# Supplementary material for: A highly enantioselective catalytic Strecker reaction of cyclic (Z)-aldimines
Source: Royal Society of Chemistry journal article supplement (doi:10.1039/c2cc31001e), 2012-01-01
Supplement: c2cc31001e.pdf [file c2cc31001e.pdf]

## A highly enantioselective catalytic Strecker reaction of cyclic (*Z*)-aldimines

You-Dong Shao<sup>a</sup> and Shi-Kai Tian<sup>\*a,b</sup>

<sup>a</sup> Joint Laboratory of Green Synthetic Chemistry, Department of Chemistry, University of Science and Technology of China, Hefei, Anhui 230026, China

<sup>b</sup> Key Laboratory of Synthetic Chemistry of Natural Substances, Shanghai Institute of Organic Chemistry, Chinese Academy of Sciences, 354 Fenglin Road, Shanghai 200032, China

### Supporting information

#### Table of contents

|                                                                                                        |      |
|--------------------------------------------------------------------------------------------------------|------|
| General information.....                                                                               | S-2  |
| Preparation of cyclic ( <i>Z</i> )-aldimines.....                                                      | S-2  |
| General procedure for the catalytic asymmetric Strecker reaction of cyclic ( <i>Z</i> )-aldimines..... | S-4  |
| Analytical data for the products.....                                                                  | S-5  |
| Transformation of compound <b>3a</b> .....                                                             | S-13 |
| References.....                                                                                        | S-14 |
| Copies of <sup>1</sup> H and <sup>13</sup> C NMR spectra.....                                          | S-15 |
| Copies of HPLC spectra.....                                                                            | S-30 |
| Crystal data.....                                                                                      | S-52 |

### General information

$^1\text{H}$  and  $^{13}\text{C}$  NMR spectra were recorded on a Bruker AC-400 FT (400 MHz and 100 MHz, respectively) using tetramethylsilane as an internal reference. Chemical shifts ( $\delta$ ) and coupling constants ( $J$ ) were expressed in ppm and Hz, respectively. High resolution mass spectra were recorded on a LC-TOF spectrometer (Micromass). ESI-MS data were acquired using a Thermo LTQ Orbitrap XL instrument equipped with an ESI source and controlled by Xcalibur software. High pressure liquid chromatography (HPLC) analyses were performed on a Hewlett-Packard 1200 Series instrument equipped with an isostatic pump, using a chiral stationary phase column (Daicel Co. CHIRALPAK), and the UV detection was monitored at 254 nm. The chiral HPLC methods were calibrated with the corresponding racemic mixtures. Optical rotations were measured on a Perkin-Elmer 343 Polarimeter with a sodium lamp at  $\lambda = 589$  nm and reported as  $[\alpha]_{\text{D}}^{25}$  ( $c = \text{g}/100$  mL, solvent). Melting points were uncorrected.

Toluene and ethyl ether were distilled over sodium/benzophenone. Dichloromethane, chloroform, and 1,2-dichloroethane were distilled over calcium hydride. Ethyl acetate and acetonitrile were dried over aluminum oxide prior to use. Methanol was distilled over sodium. Chemicals were purchased from the Sinopharm Chemical Reagent Co., Meryer, Acros, Alfa Aesar, and AstaTech Pharmaceutical Co., and used as received. Cinchona alkaloid-derived thiourea catalysts were prepared according to known procedures.<sup>1</sup>

### Preparation of cyclic (Z)-aldimines

3*H*-Indoles **1a-b**, **1e**, and **1h**<sup>2</sup> and 2*H*-benzo[*b*][1,4]thiazines **1m-n**<sup>3</sup> are known compounds, and they were prepared according to literature procedures. New 3*H*-indoles were prepared as shown below.<sup>2</sup>

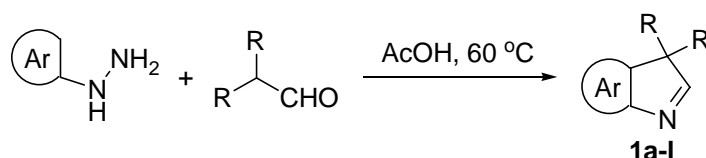

To a solution of the aldehyde (2.0 mmol) in acetic acid (20 mL) was added the arylhydrazine (2.0 mmol). The mixture was heated at 60 °C for 0.5-2 h, cooled to room temperature, and concentrated under reduced pressure. The residue was dissolved in ethyl acetate (30 mL), and washed with ice-cold saturated aqueous sodium bicarbonate. The organic layer was dried over anhydrous sodium sulfate, and concentrated. The residue was subjected to column chromatography on silica gel, using ethyl acetate/petroleum ether (1:20 to 1:5) as eluent, to give a 3*H*-indole.

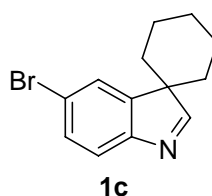

**1c** was obtained in 54% yield. Brown oil;  $^1\text{H}$  NMR (400 MHz,  $\text{CDCl}_3$ )  $\delta$  8.44 (s, 1H), 7.52-7.48 (m, 1H), 7.32-7.28 (m, 1H), 7.15-7.10 (m, 1H), 1.94-1.55 (m, 10H);  $^{13}\text{C}$  NMR (100 MHz,  $\text{CDCl}_3$ )  $\delta$  179.4, 152.6, 146.5, 131.2, 127.5, 121.2, 115.1, 59.8, 31.7, 25.5, 23.9; HRMS (EI) calcd for  $\text{C}_{13}\text{H}_{14}\text{BrN}$  (M) 263.0310, found 263.0311.

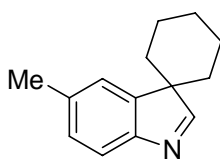

**1d**

**1d** was obtained in 55% yield. Yellowish oil;  $^1\text{H}$  NMR (400 MHz,  $\text{CDCl}_3$ )  $\delta$  8.28 (s, 1H), 7.53-7.49 (m, 1H), 7.18 (s, 1H), 7.15-7.12 (m, 1H), 2.41 (s, 3H), 1.94-1.54 (m, 10H);  $^{13}\text{C}$  NMR (100 MHz,  $\text{CDCl}_3$ )  $\delta$  177.5, 152.6, 145.0, 135.8, 128.4, 123.1, 120.8, 57.7, 32.0, 25.7, 24.1, 21.7; HRMS (EI) calcd for  $\text{C}_{14}\text{H}_{17}\text{N}$  (M) 199.1361, found 199.1358.

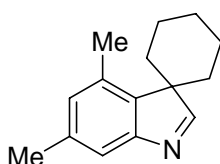

**1f**

**1f** was obtained in 63% yield. Yellowish solid, m.p. 110 °C;  $^1\text{H}$  NMR (400 MHz,  $\text{CDCl}_3$ )  $\delta$  8.53 (s, 1H), 7.30 (s, 1H), 6.83 (s, 1H), 2.44 (s, 3H), 2.36 (s, 3H), 2.28-2.18 (m, 2H), 2.00-1.88 (m, 3H), 1.77-1.70 (m, 2H), 1.50-1.40 (m, 3H);  $^{13}\text{C}$  NMR (100 MHz,  $\text{CDCl}_3$ )  $\delta$  177.7, 154.8, 138.7, 137.7, 132.7, 129.5, 119.7, 58.7, 29.8, 25.9, 25.0, 21.3, 18.1; HRMS (EI) calcd for  $\text{C}_{15}\text{H}_{19}\text{N}$  (M) 213.1517, found 213.1520.

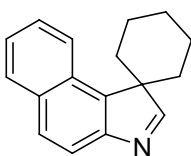

**1g**

**1g** was obtained in 70% yield. Brown solid, m.p. 98-99 °C;  $^1\text{H}$  NMR (400 MHz,  $\text{CDCl}_3$ )  $\delta$  8.76 (s, 1H), 8.13-8.09 (m, 1H), 7.98-7.95 (m, 1H), 7.90-7.85 (m, 2H), 7.58-7.54 (m, 1H), 7.49-7.45 (m, 1H), 2.46-2.37 (m, 2H), 2.11-2.00 (m, 3H), 1.92-1.78 (m, 2H), 1.65-1.56 (m, 1H), 1.53-1.47 (m, 2H);  $^{13}\text{C}$  NMR (100 MHz,  $\text{CDCl}_3$ )  $\delta$  179.2, 151.1, 138.1, 133.0, 129.7, 129.1, 128.6, 126.2, 124.8, 123.0, 120.6, 60.0, 31.7, 25.9, 25.1; HRMS (EI) calcd for  $\text{C}_{17}\text{H}_{17}\text{N}$  (M) 235.1361, found 235.1342.

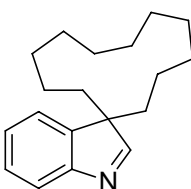

**1i**

**1i** was obtained in 47% yield. Yellowish oil;  $^1\text{H}$  NMR (400 MHz,  $\text{CDCl}_3$ )  $\delta$  8.12 (s, 1H), 7.65-7.61 (m, 1H), 7.37-7.30 (m, 2H), 7.22-7.17 (m, 1H), 1.76-1.41 (m, 22H);  $^{13}\text{C}$  NMR (100 MHz,  $\text{CDCl}_3$ )  $\delta$  179.2, 154.6, 144.3, 127.6, 125.5, 123.0, 121.2, 60.1, 28.0, 26.7, 26.1, 22.7, 22.1, 21.0; HRMS (EI) calcd for  $\text{C}_{19}\text{H}_{27}\text{N}$  (M) 269.2143, found 269.2149.

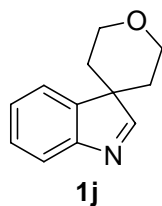

**1j** was obtained in 51% yield. Yellowish solid, m.p. 112-123 °C; <sup>1</sup>H NMR (400 MHz, CDCl<sub>3</sub>) δ 8.46 (s, 1H), 7.70-7.67 (m, 1H), 7.52-7.44 (m, 1H), 7.41-7.36 (m, 1H), 7.32-7.28 (m, 1H), 4.17-4.10 (m, 2H), 3.96-3.88 (m, 2H), 2.02-1.94 (m, 2H), 1.68-1.61 (m, 2H); <sup>13</sup>C NMR (100 MHz, CDCl<sub>3</sub>) δ 176.0, 154.3, 143.1, 128.3, 126.5, 122.2, 121.5, 65.5, 55.0, 31.1; HRMS (EI) calcd for C<sub>12</sub>H<sub>13</sub>NO (M) 187.0997, found 187.0983.

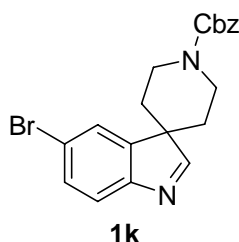

**1k** was obtained in 67% yield. Brown solid, m.p. 56-57 °C; <sup>1</sup>H NMR (400 MHz, CDCl<sub>3</sub>) δ 8.40 (s, 1H), 7.57-7.50 (m, 3H), 7.42-7.31 (m, 5H), 5.20 (s, 2H), 4.13-4.07 (m, 2H), 3.60-3.51 (m, 2H), 1.86-1.79 (m, 2H), 1.71-1.65 (m, 2H); <sup>13</sup>C NMR (100 MHz, CDCl<sub>3</sub>) δ 176.2, 155.5, 153.1, 144.8, 136.6, 131.7, 128.7, 128.4, 128.2, 125.9, 123.0, 120.7, 67.6, 56.4, 42.0, 30.6; HRMS (EI) calcd for C<sub>20</sub>H<sub>19</sub>N<sub>2</sub>O<sub>2</sub>Br (M) 398.0630, found 398.0638.

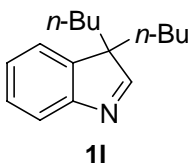

**1l** was obtained in 32% yield. Red oil; <sup>1</sup>H NMR (400 MHz, CDCl<sub>3</sub>) δ 8.01 (s, 1H), 7.63-7.60 (m, 1H), 7.35-7.28 (m, 1H), 7.26-7.23 (m, 2H), 1.91-1.74 (m, 4H), 1.25-1.11 (m, 4H), 1.05-0.94 (m, 2H), 0.88-0.78 (m, 2H), 0.77 (t, *J* = 7.2 Hz, 6H); <sup>13</sup>C NMR (100 MHz, CDCl<sub>3</sub>) δ 179.6, 155.8, 142.6, 127.6, 126.0, 121.9, 121.1, 62.2, 35.2, 26.6, 23.2, 13.9; HRMS (EI) calcd for C<sub>16</sub>H<sub>23</sub>N (M) 229.1830, found 229.1801.

### General procedure for the catalytic asymmetric Strecker reaction of cyclic (*Z*)-aldimines

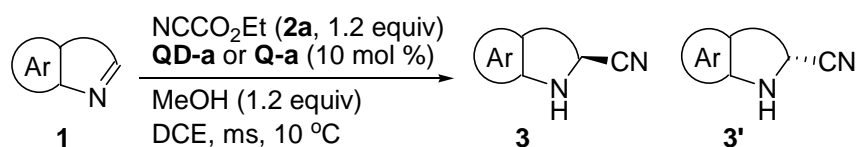

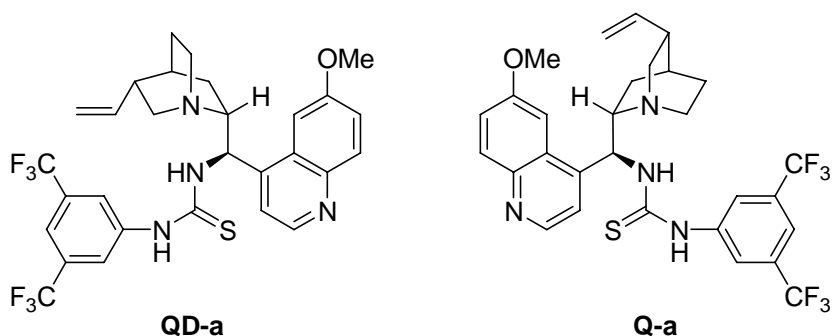

To a flame dried reaction vial equipped with a magnetic stirring bar were added powdered 3 Å molecular sieves (20.0 mg). The molecular sieves were thermally activated under vacuum for 30 min, and cooled to 10 °C under nitrogen. To the reaction vial were added cyclic (*Z*)-aldimine **1** (0.10 mmol), catalyst **QD-a** or **Q-a** (5.9 mg, 0.010 mmol), 1,2-dichloroethane (1.0 mL), ethyl cyanoformate (**2a**, 12.0 mg, 0.12 mmol), and methanol (3.8 mg, 0.12 mmol). The resulting mixture was stirred at 10 °C for a period as specified in Table 2, and directly charged onto silica gel. Product **3** or **3'** was isolated using petroleum ether/ethyl acetate (20/1~3/1) as eluent.

The absolute configuration of 2-cyanoindoline **3b** and 3-cyano-3,4-dihydro-2*H*-benzo[*b*][1,4]thiazine **3m** was determined to be *S* and *R*, respectively, by single-crystal X-ray analysis, and that of the rest products was determined by analogy.

#### Analytical data for the products

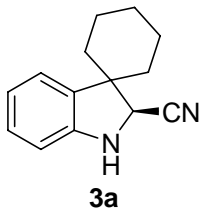

**3a** was obtained as a white solid in 99% yield and 96% ee from a reaction catalyzed by **QD-a**. The ee value was determined by chiral stationary phase HPLC analysis [Hypersil + Chiralpak IC, isopropanol/hexane (10:90), 1.0 mL/min,  $\lambda = 254$  nm,  $t_r$  (major) = 25.1 min,  $t_r$  (minor) = 32.8 min]. m.p. 82-84 °C;  $[\alpha]_D^{25} = +169.0$  ( $c = 1.0$ ,  $\text{CHCl}_3$ );  $^1\text{H NMR}$  (400 MHz,  $\text{CDCl}_3$ )  $\delta$  7.12-7.07 (m, 2H), 6.87-6.82 (m, 1H), 6.72-6.68 (m, 1H), 4.47 (s, 1H), 4.13 (br., s, 1H), 2.20-2.14 (m, 1H), 2.02-1.72 (m, 5H), 1.51-1.36 (m, 4H);  $^{13}\text{C NMR}$  (100 MHz,  $\text{CDCl}_3$ )  $\delta$  147.2, 135.1, 128.4, 123.0, 120.6, 119.6, 110.6, 57.2, 49.9, 35.6, 33.0, 25.5, 23.3, 23.2; HRMS (EI) calcd for  $\text{C}_{14}\text{H}_{16}\text{N}_2$  (M) 212.1313, found 212.1316.

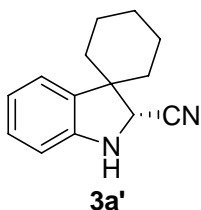

**3a'** was obtained as a white solid in 99% yield and 97% ee from a reaction catalyzed by **Q-a**.

The ee value was determined by chiral stationary phase HPLC analysis [Hypersil + Chiralpak IC, isopropanol/hexane (10:90), 1.0 mL/min,  $\lambda = 254$  nm,  $t_r$  (minor) = 23.8 min,  $t_r$  (major) = 30.1 min].  $[\alpha]_D^{25} = -171.4$  ( $c = 1.0$ ,  $\text{CHCl}_3$ ).

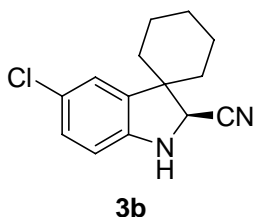

**3b** was obtained as a white solid in 73% yield and 97% ee from a reaction catalyzed by **QD-a**. The ee value was determined by chiral stationary phase HPLC analysis [Hypersil + Chiralpak IC, isopropanol/hexane (5:95), 1.0 mL/min,  $\lambda = 254$  nm,  $t_r$  (major) = 13.6 min,  $t_r$  (minor) = 18.3 min]. m.p. 101-102 °C;  $[\alpha]_D^{25} = +152.5$  ( $c = 1.0$ ,  $\text{CHCl}_3$ );  $^1\text{H}$  NMR (400 MHz,  $\text{CDCl}_3$ )  $\delta$  7.07-7.02 (m, 2H), 6.63-6.60 (m, 1H), 4.49 (s, 1H), 2.19-2.14 (m, 1H), 1.97-1.73 (m, 5H), 1.49-1.35 (m, 4H);  $^{13}\text{C}$  NMR (100 MHz,  $\text{CDCl}_3$ )  $\delta$  145.8, 137.0, 128.2, 125.3, 123.4, 119.1, 111.4, 57.5, 50.0, 35.4, 32.8, 25.3, 23.1, 23.0; HRMS (EI) calcd for  $\text{C}_{14}\text{H}_{15}\text{N}_2\text{Cl}$  (M) 246.0924, found 246.0941.

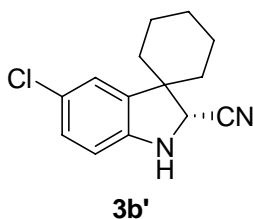

**3b'** was obtained as a white solid in 80% yield and 97% ee from a reaction catalyzed by **Q-a**. The ee value was determined by chiral stationary phase HPLC analysis [Hypersil + Chiralpak IC, isopropanol/hexane (5:95), 1.0 mL/min,  $\lambda = 254$  nm,  $t_r$  (minor) = 13.6 min,  $t_r$  (major) = 17.4 min].  $[\alpha]_D^{25} = -153.2$  ( $c = 1.0$ ,  $\text{CHCl}_3$ ).

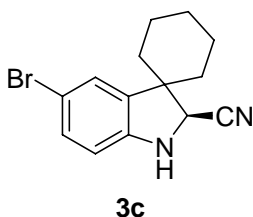

**3c** was obtained as a white solid in 83% yield and 98% ee from a reaction catalyzed by **QD-a**. The ee value was determined by chiral stationary phase HPLC analysis [Chiralpak IC, isopropanol/hexane (5:95), 1.0 mL/min,  $\lambda = 254$  nm,  $t_r$  (major) = 13.8 min,  $t_r$  (minor) = 18.9 min]. m.p. 97-98 °C;  $[\alpha]_D^{25} = +149.5$  ( $c = 2.0$ ,  $\text{CHCl}_3$ );  $^1\text{H}$  NMR (400 MHz,  $\text{CDCl}_3$ )  $\delta$  7.21-7.17 (m, 2H), 6.58-6.54 (m, 1H), 4.48 (s, 1H), 2.18-2.13 (m, 1H), 1.96-1.70 (m, 5H), 1.49-1.34 (m, 4H);  $^{13}\text{C}$  NMR (100 MHz,  $\text{CDCl}_3$ )  $\delta$  146.3, 137.5, 131.1, 126.2, 119.1, 112.4, 112.0, 57.4, 50.0, 35.5, 32.8, 25.3, 23.1, 23.0; HRMS (EI) calcd for  $\text{C}_{14}\text{H}_{15}\text{N}_2\text{Br}$  (M) 290.0419, found 290.0426.

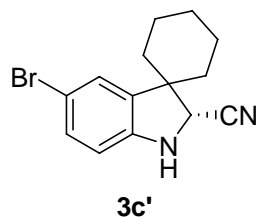

**3c'** was obtained as a white solid in 90% yield and 96% ee from a reaction catalyzed by **Q-a**. The ee value was determined by chiral stationary phase HPLC analysis [Chiralpak IC, isopropanol/hexane (5:95), 1.0 mL/min,  $\lambda = 254$  nm,  $t_r$  (minor) = 12.0 min,  $t_r$  (major) = 15.8 min].  $[\alpha]_D^{25} = -142.8$  ( $c = 1.1$ ,  $\text{CHCl}_3$ ).

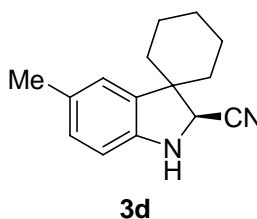

**3d** was obtained as a white solid in 99% yield and 97% ee from a reaction catalyzed by **QD-a**. The ee value was determined by chiral stationary phase HPLC analysis [Chiralpak IC, isopropanol/hexane (10:90), 1.0 mL/min,  $\lambda = 254$  nm,  $t_r$  (major) = 12.5 min,  $t_r$  (minor) = 14.2 min]. m.p. 92-94 °C;  $[\alpha]_D^{25} = +168.6$  ( $c = 1.0$ ,  $\text{CHCl}_3$ );  $^1\text{H}$  NMR (400 MHz,  $\text{CDCl}_3$ )  $\delta$  6.91-6.88 (m, 2H), 6.61-6.58 (m, 1H), 4.45 (s, 1H), 2.28 (s, 3H), 2.18-2.13 (m, 1H), 2.00-1.71 (m, 5H), 1.50-1.34 (m, 4H);  $^{13}\text{C}$  NMR (100 MHz,  $\text{CDCl}_3$ )  $\delta$  144.9, 135.4, 130.0, 128.8, 123.6, 119.7, 110.5, 57.4, 49.9, 35.5, 33.0, 25.5, 23.3, 23.2, 21.1; HRMS (EI) calcd for  $\text{C}_{15}\text{H}_{18}\text{N}_2$  (M) 226.1470, found 226.1477.

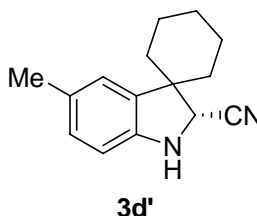

**3d'** was obtained as a white solid in 99% yield and 98% ee from a reaction catalyzed by **Q-a**. The ee value was determined by chiral stationary phase HPLC analysis [Chiralpak IC, isopropanol/hexane (10:90), 1.0 mL/min,  $\lambda = 254$  nm,  $t_r$  (minor) = 12.4 min,  $t_r$  (major) = 14.1 min].  $[\alpha]_D^{25} = -170.6$  ( $c = 1.0$ ,  $\text{CHCl}_3$ ).

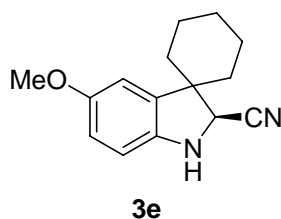

**3e** was obtained as a white solid in 99% yield and 97% ee from a reaction catalyzed by **QD-a**. The ee value was determined by chiral stationary phase HPLC analysis [Chiralpak AD,

isopropanol/hexane (10:90), 1.0 mL/min,  $\lambda = 254$  nm,  $t_r$  (minor) = 14.6 min,  $t_r$  (major) = 18.5 min]. m.p. 92-93 °C;  $[\alpha]_D^{25} = +196.1$  ( $c = 1.0$ ,  $\text{CHCl}_3$ );  $^1\text{H NMR}$  (400 MHz,  $\text{CDCl}_3$ )  $\delta$  6.71-6.60 (m, 3H), 4.46 (s, 1H), 3.97 (br., s, 1H), 3.76 (s, 3H), 2.19-2.13 (m, 1H), 1.97-1.70 (m, 5H), 1.49-1.35 (m, 4H);  $^{13}\text{C NMR}$  (100 MHz,  $\text{CDCl}_3$ )  $\delta$  154.7, 140.8, 136.9, 119.7, 113.0, 111.2, 110.0, 57.7, 56.0, 50.1, 35.3, 32.9, 25.4, 23.3, 23.1; HRMS (EI) calcd for  $\text{C}_{15}\text{H}_{18}\text{N}_2\text{O}$  (M) 242.1419, found 242.1422.

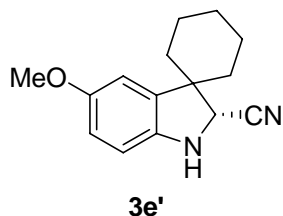

**3e'** was obtained as a white solid in 99% yield and 97% ee from a reaction catalyzed by **Q-a**. The ee value was determined by chiral stationary phase HPLC analysis [Chiralpak AD, isopropanol/hexane (10:90), 1.0 mL/min,  $\lambda = 254$  nm,  $t_r$  (major) = 14.9 min,  $t_r$  (minor) = 18.1 min].  $[\alpha]_D^{25} = -194.3$  ( $c = 1.0$ ,  $\text{CHCl}_3$ ).

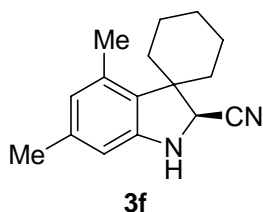

**3f** was obtained as a white solid in 99% yield and 98% ee from a reaction catalyzed by **QD-a**. The ee value was determined by chiral stationary phase HPLC analysis [Chiralpak IC, isopropanol/hexane (5:95), 1.0 mL/min,  $\lambda = 254$  nm,  $t_r$  (major) = 15.3 min,  $t_r$  (minor) = 18.0 min]. m.p. 77-79 °C;  $[\alpha]_D^{25} = +173.1$  ( $c = 1.0$ ,  $\text{CHCl}_3$ );  $^1\text{H NMR}$  (400 MHz,  $\text{CDCl}_3$ )  $\delta$  6.41 (s, 1H), 6.37 (s, 1H), 4.53 (s, 1H), 2.40-2.25 (m, 5H), 2.22 (s, 3H), 1.87-1.72 (m, 4H), 1.63-1.54 (m, 1H), 1.46-1.28 (m, 3H);  $^{13}\text{C NMR}$  (100 MHz,  $\text{CDCl}_3$ )  $\delta$  147.9, 138.2, 134.0, 128.5, 124.8, 120.2, 109.5, 56.4, 51.5, 32.9, 31.8, 25.5, 23.6, 23.3, 21.2, 19.5; HRMS (EI) calcd for  $\text{C}_{16}\text{H}_{20}\text{N}_2$  (M) 240.1626, found 240.1655.

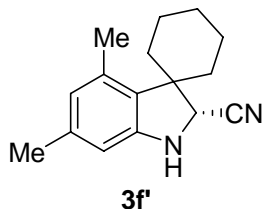

**3f'** was obtained as a white solid in 99% yield and 97% ee from a reaction catalyzed by **Q-a**. The ee value was determined by chiral stationary phase HPLC analysis [Chiralpak IC, isopropanol/hexane (5:95), 1.0 mL/min,  $\lambda = 254$  nm,  $t_r$  (minor) = 15.2 min,  $t_r$  (major) = 17.9 min].  $[\alpha]_D^{25} = -167.3$  ( $c = 1.0$ ,  $\text{CHCl}_3$ ).



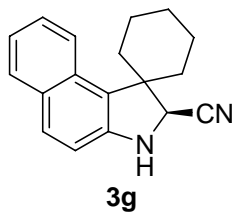

**3g** was obtained as a white solid in 99% yield and 95% ee from a reaction catalyzed by **QD-a**. The ee value was determined by chiral stationary phase HPLC analysis [Hypersil + Chiralpak IC, isopropanol/hexane (5:95), 1.0 mL/min,  $\lambda = 254$  nm,  $t_r$  (major) = 19.7 min,  $t_r$  (minor) = 28.4 min]. m.p. 160-161 °C;  $[\alpha]_D^{25} = +283.0$  (c = 0.4, CHCl<sub>3</sub>); <sup>1</sup>H NMR (400 MHz, CDCl<sub>3</sub>)  $\delta$  8.05 (d,  $J = 8.4$ , Hz, 1H), 7.80-7.76 (m, 1H), 7.66 (d,  $J = 8.8$  Hz, 1H), 7.45-7.40 (m, 1H), 7.28-7.23 (m, 1H), 7.00 (d,  $J = 8.8$  Hz, 1H), 4.72 (s, 1H), 4.27 (br., s, 1H), 2.86-2.76 (m, 1H), 2.49-2.43 (m, 1H), 2.04-1.80 (m, 5H), 1.53-1.43 (m, 3H); <sup>13</sup>C NMR (100 MHz, CDCl<sub>3</sub>)  $\delta$  145.2, 130.6, 130.5, 130.3, 129.9, 126.6, 124.0, 122.5, 121.5, 120.1, 113.1, 57.0, 52.9, 33.5, 32.6, 25.6, 23.8, 23.4; HRMS (EI) calcd for C<sub>18</sub>H<sub>18</sub>N<sub>2</sub> (M) 262.1470, found 262.1485.

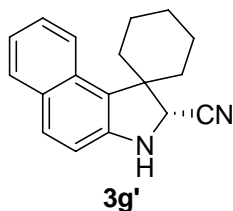

**3g'** was obtained as a white solid in 99% yield and 97% ee from a reaction catalyzed by **Q-a**. The ee value was determined by chiral stationary phase HPLC analysis [Hypersil + Chiralpak IC, isopropanol/hexane (5:95), 1.0 mL/min,  $\lambda = 254$  nm,  $t_r$  (minor) = 19.9 min,  $t_r$  (major) = 28.6 min].  $[\alpha]_D^{25} = -304.4$  (c = 0.4, CHCl<sub>3</sub>).

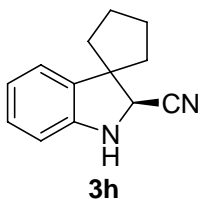

**3h** was obtained as a yellowish oil in 93% yield and 92% ee from a reaction catalyzed by **QD-a**. The ee value was determined by chiral stationary phase HPLC analysis [Chiralpak IC, isopropanol/hexane (10:90), 1.0 mL/min,  $\lambda = 254$  nm,  $t_r$  (major) = 9.9 min,  $t_r$  (minor) = 17.8 min].  $[\alpha]_D^{25} = +159.1$  (c = 1.0, CHCl<sub>3</sub>); <sup>1</sup>H NMR (400 MHz, CDCl<sub>3</sub>)  $\delta$  7.12-7.05 (m, 2H), 6.87-6.83 (m, 1H), 6.70 (d,  $J = 8.0$  Hz, 1H), 4.29 (s, 1H), 2.32-2.25 (m, 1H), 2.06-1.74 (m, 7H); <sup>13</sup>C NMR (100 MHz, CDCl<sub>3</sub>)  $\delta$  147.5, 134.9, 128.2, 122.5, 120.9, 119.3, 110.5, 60.2, 56.7, 39.7, 36.1, 25.0, 24.9; HRMS (EI) calcd for C<sub>13</sub>H<sub>14</sub>N<sub>2</sub> (M) 198.1157, found 198.1176.

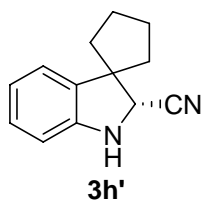

**3h'** was obtained as a yellowish oil in 83% yield and 98% ee from a reaction catalyzed by **Q-a**. The ee value was determined by chiral stationary phase HPLC analysis [Chiralpak IC, isopropanol/hexane (10:90), 1.0 mL/min,  $\lambda = 254$  nm,  $t_r$  (minor) = 9.3 min,  $t_r$  (major) = 15.9 min].  $[\alpha]_D^{25} = -171.6$  ( $c = 1.0$ ,  $\text{CHCl}_3$ ).

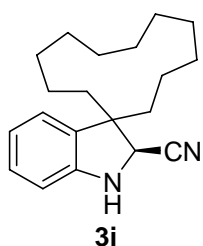

**3i** was obtained as a white solid in 99% yield and 93% ee from a reaction catalyzed by **QD-a**. The ee value was determined by chiral stationary phase HPLC analysis [Chiralpak IC, isopropanol/hexane (5:95), 1.0 mL/min,  $\lambda = 254$  nm,  $t_r$  (major) = 10.0 min,  $t_r$  (minor) = 13.0 min]. m.p. 119-120 °C;  $[\alpha]_D^{25} = +100.2$  ( $c = 1.0$ ,  $\text{CHCl}_3$ );  $^1\text{H}$  NMR (400 MHz,  $\text{CDCl}_3$ )  $\delta$  7.11-7.06 (m, 1H), 7.05-7.02 (m, 1H), 6.83-6.79 (m, 1H), 6.69 (d,  $J = 7.6$  Hz, 1H), 4.22 (s, 1H), 2.00-1.87 (m, 3H), 1.61-1.31 (m, 19H);  $^{13}\text{C}$  NMR (100 MHz,  $\text{CDCl}_3$ )  $\delta$  147.1, 133.9, 128.2, 124.2, 120.1, 119.3, 110.6, 59.8, 51.7, 31.3, 28.6, 26.5, 26.4, 26.2, 22.7, 22.6, 22.2, 22.1, 19.4, 19.3; HRMS (EI) calcd for  $\text{C}_{20}\text{H}_{28}\text{N}_2$  (M) 296.2252, found 296.2259.

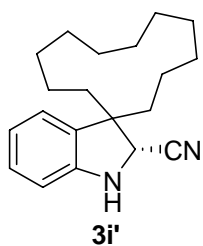

**3i'** was obtained as a white solid in 99% yield and 94% ee from a reaction catalyzed by **Q-a**. The ee value was determined by chiral stationary phase HPLC analysis [Chiralpak IC, isopropanol/hexane (5:95), 1.0 mL/min,  $\lambda = 254$  nm,  $t_r$  (minor) = 10.0 min,  $t_r$  (major) = 13.0 min].  $[\alpha]_D^{25} = -104.9$  ( $c = 1.0$ ,  $\text{CHCl}_3$ ).

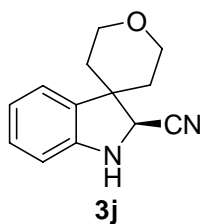

**3j** was obtained as a white solid in 99% yield and 91% ee from a reaction catalyzed by **QD-a**. The ee value was determined by chiral stationary phase HPLC analysis [Hypersil + Chiralpak IC, isopropanol/hexane (10:90), 1.0 mL/min,  $\lambda = 254$  nm,  $t_r$  (major) = 21.8 min,  $t_r$  (minor) = 27.6 min]. m.p. 217-218 °C;  $[\alpha]_D^{25} = +146.5$  ( $c = 0.2$ ,  $\text{CHCl}_3$ );  $^1\text{H}$  NMR (400 MHz,  $\text{DMSO-}d_6$ )  $\delta$  7.17 (d,  $J = 7.6$  Hz, 1H), 7.08-7.02 (m, 1H), 6.75-6.69 (m, 1H), 6.67-6.63 (m, 2H), 4.91 (s, 1H), 3.97-3.91 (m, 1H), 3.76-3.64 (m, 2H), 3.53-3.45 (m, 1H), 2.28-2.20 (m, 1H), 1.90-1.82 (m, 1H), 1.67-1.60 (m, 1H), 1.55-1.47 (m, 1H);  $^{13}\text{C}$  NMR (100 MHz,  $\text{DMSO-}d_6$ )  $\delta$  148.4, 133.8, 128.2, 122.7, 119.8, 118.9, 109.7, 63.8, 63.6, 56.1, 46.7, 34.9, 32.2; HRMS (EI) calcd for  $\text{C}_{13}\text{H}_{12}\text{N}_2\text{O}$  (M) 214.1106, found 214.1112.

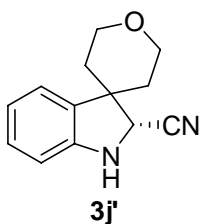

**3j'** was obtained as a white solid in 99% yield and 98% ee from a reaction catalyzed by **Q-a**. The ee value was determined by chiral stationary phase HPLC analysis [Hypersil + Chiralpak IC, isopropanol/hexane (10:90), 1.0 mL/min,  $\lambda = 254$  nm,  $t_r$  (minor) = 22.7 min,  $t_r$  (major) = 28.5 min].  $[\alpha]_D^{25} = -166.7$  ( $c = 0.2$ ,  $\text{CHCl}_3$ ).

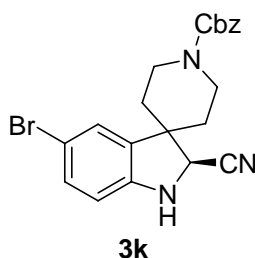

**3k** was obtained as a white solid in 85% yield and 97% ee from a reaction catalyzed by **QD-a**. The ee value was determined by chiral stationary phase HPLC analysis [Chiralpak IC, isopropanol/hexane (20:80), 1.0 mL/min,  $\lambda = 254$  nm,  $t_r$  (major) = 17.9 min,  $t_r$  (minor) = 22.6 min]. m.p. 67-69 °C;  $[\alpha]_D^{25} = +145.5$  ( $c = 1.0$ ,  $\text{CHCl}_3$ );  $^1\text{H}$  NMR (400 MHz,  $\text{CDCl}_3$ )  $\delta$  7.41-7.30 (m, 5H), 7.22 (dd,  $J = 8.4, 2.0$  Hz, 1H), 7.17 (d,  $J = 2.0$  Hz, 1H), 6.59 (d,  $J = 8.4$  Hz, 1H), 5.17 (s, 2H), 4.49 (s, 1H), 4.20-4.15 (m, 1H), 4.08-4.04 (m, 1H), 3.17-3.07 (m, 2H), 2.20-2.06 (m, 2H), 1.84-1.80 (m, 1H), 1.65-1.56 (m, 1H);  $^{13}\text{C}$  NMR (100 MHz,  $\text{CDCl}_3$ )  $\delta$  155.3, 146.3, 136.6, 135.3, 131.8, 128.7, 128.3, 128.1, 126.3, 118.3, 112.6, 112.2, 67.5, 56.8, 48.3, 41.1, 40.9, 34.5, 32.0; HRMS (EI) calcd for  $\text{C}_{21}\text{H}_{20}\text{N}_3\text{O}_2\text{Br}$  (M) 425.0739, found 425.0772.

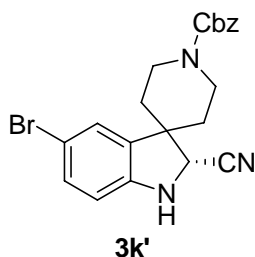

**3k'** was obtained as a white solid in 79% yield and 97% ee from a reaction catalyzed by **Q-a**. The ee value was determined by chiral stationary phase HPLC analysis [Chiralpak IC, isopropanol/hexane (20:80), 1.0 mL/min,  $\lambda = 254$  nm,  $t_r$  (minor) = 18.0 min,  $t_r$  (major) = 22.4 min].  $[\alpha]_D^{25} = -146.8$  ( $c = 1.0$ ,  $\text{CHCl}_3$ ).

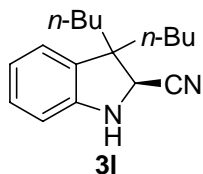

**3l** was obtained as a yellowish oil in 98% yield and 96% ee from a reaction catalyzed by **QD-a**. The ee value was determined by chiral stationary phase HPLC analysis [Chiralpak AD, isopropanol/hexane (2:98), 1.0 mL/min,  $\lambda = 254$  nm,  $t_r$  (major) = 12.2 min,  $t_r$  (minor) = 17.2 min].  $[\alpha]_D^{25} = +169.7$  ( $c = 1.0$ ,  $\text{CHCl}_3$ );  $^1\text{H NMR}$  (400 MHz,  $\text{CDCl}_3$ )  $\delta$  7.12-7.06 (m, 1H), 7.00 (d,  $J = 7.2$  Hz, 1H), 6.86-6.80 (m, 1H), 6.68 (d,  $J = 7.6$  Hz, 1H), 4.37 (d,  $J = 2.8$  Hz, 1H), 4.11 (br. s, 1H), 2.01-1.92 (m, 1H), 1.84-1.61 (m, 3H), 1.45-1.11 (m, 8H), 1.00-0.85 (m, 6H);  $^{13}\text{C NMR}$  (100 MHz,  $\text{CDCl}_3$ )  $\delta$  147.8, 133.1, 128.3, 123.9, 120.2, 119.0, 110.4, 58.8, 52.4, 36.8, 35.5, 26.3, 26.2, 23.3, 23.2, 14.1; HRMS (EI) calcd for  $\text{C}_{17}\text{H}_{24}\text{N}_2$  (M) 256.1939, found 256.1959.

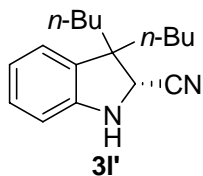

**3l'** was obtained as a yellowish oil in 95% yield and 98% ee from a reaction catalyzed by **Q-a**. The ee value was determined by chiral stationary phase HPLC analysis [Chiralpak AD, isopropanol/hexane (2:98), 1.0 mL/min,  $\lambda = 254$  nm,  $t_r$  (minor) = 12.1 min,  $t_r$  (major) = 17.1 min].  $[\alpha]_D^{25} = -177.9$  ( $c = 1.0$ ,  $\text{CHCl}_3$ ).

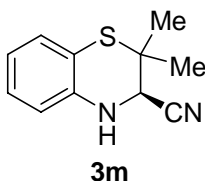

**3m** was obtained as a white solid in 90% yield and 94% ee from a reaction catalyzed by **QD-a**. The ee value was determined by chiral stationary phase HPLC analysis [Hypersil + Chiralpak IC, isopropanol/hexane (5:95), 1.0 mL/min,  $\lambda = 254$  nm,  $t_r$  (major) = 20.0 min,  $t_r$  (minor) = 23.0 min]. m.p. 120-121 °C;  $[\alpha]_D^{25} = +179.5$  ( $c = 1.0$ ,  $\text{CHCl}_3$ );  $^1\text{H NMR}$  (400 MHz,  $\text{CDCl}_3$ )  $\delta$  7.02-6.94 (m, 2H), 6.80-6.74 (m, 1H), 6.60 (dd,  $J = 8.0, 1.2$  Hz, 1H), 4.20 (s, 1H), 1.57 (s, 3H), 1.49 (s, 3H);  $^{13}\text{C NMR}$  (100 MHz,  $\text{CDCl}_3$ )  $\delta$  136.5, 127.9, 126.1, 120.4, 117.7, 116.0, 115.9, 54.3, 40.8, 27.8, 26.3; HRMS (EI) calcd for  $\text{C}_{11}\text{H}_{12}\text{N}_2\text{S}$  (M) 204.0721, found 204.0726.

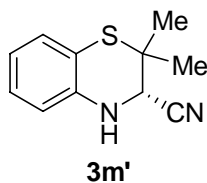

**3m'** was obtained as a white solid in 98% yield and 97% ee from a reaction catalyzed by **Q-a**. The ee value was determined by chiral stationary phase HPLC analysis [Hypersil + Chiralpak IC, isopropanol/hexane (5:95), 1.0 mL/min,  $\lambda = 254$  nm,  $t_r$  (minor) = 20.3 min,  $t_r$  (major) = 23.5 min].  $[\alpha]_D^{25} = -186.6$  (c = 1.0,  $\text{CHCl}_3$ ).

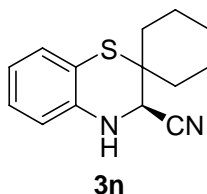

**3n** was obtained as a white solid in 99% yield and 94% ee from a reaction catalyzed by **QD-a**. The ee value was determined by chiral stationary phase HPLC analysis [Chiralpak IC, isopropanol/hexane (5:95), 1.0 mL/min,  $\lambda = 254$  nm,  $t_r$  (major) = 18.2 min,  $t_r$  (minor) = 20.1 min]. m.p. 121-122 °C;  $[\alpha]_D^{25} = +224.3$  (c = 1.0,  $\text{CHCl}_3$ );  $^1\text{H}$  NMR (400 MHz,  $\text{CDCl}_3$ )  $\delta$  7.03 (dd,  $J = 8.0$ , 1.2 Hz, 1H), 7.00-6.93 (m, 1H), 6.78-6.73 (m, 1H), 6.58-6.55 (m, 1H), 4.40 (br. s, 1H), 4.26 (s, 1H), 2.09-2.01 (m, 1H), 1.92-1.46 (m, 8H), 1.37-1.27 (m, 1H);  $^{13}\text{C}$  NMR (100 MHz,  $\text{CDCl}_3$ )  $\delta$  136.9, 127.9, 125.8, 120.2, 117.7, 115.8, 115.5, 53.7, 45.5, 35.1, 34.8, 25.6, 21.6, 21.5; HRMS (EI) calcd for  $\text{C}_{14}\text{H}_{16}\text{N}_2\text{S}$  (M) 244.1034, found 244.1035.

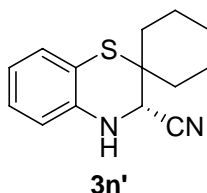

**3n'** was obtained as a white solid in 99% yield and 97% ee from a reaction catalyzed by **Q-a**. The ee value was determined by chiral stationary phase HPLC analysis [Chiralpak IC, isopropanol/hexane (5:95), 1.0 mL/min,  $\lambda = 254$  nm,  $t_r$  (minor) = 18.1 min,  $t_r$  (major) = 19.9 min].  $[\alpha]_D^{25} = -233.6$  (c = 1.0,  $\text{CHCl}_3$ ).

#### Transformation of compound **3a**<sup>4</sup>

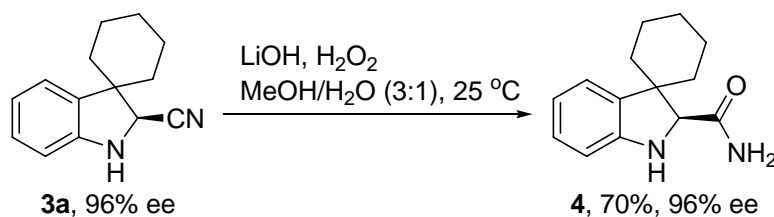

To a solution of compound **3a** (96% ee, 21.2 mg, 0.10 mmol) in methanol (1.0 mL) at room temperature were added LiOH· $\text{H}_2\text{O}$  (8.4 mg, 0.20 mmol), aqueous  $\text{H}_2\text{O}_2$  (30 wt%, 48  $\mu\text{L}$ , 0.50

mmol), and water (0.30 mL). The mixture was stirred for 1 h, added water (5 mL), and extracted with ethyl acetate ( $4 \times 10$  mL). The organic phases were combined, washed with brine, dried over anhydrous sodium sulfate, and concentrated. The residue was subjected to column chromatography on silica gel, using petroleum ether/ethyl acetate (5/1~1/1) as eluent, to give compound **4** (16.2 mg, 70%) as a white solid. The ee value was determined by chiral stationary phase HPLC analysis [Chiralpak AD, isopropanol/hexane (15:85), 1.0 mL/min,  $\lambda = 254$  nm,  $t_r$  (minor) = 7.4 min,  $t_r$  (major) = 15.8 min]. m.p. 165-166 °C;  $[\alpha]_D^{25} = -112.0$  ( $c = 0.15$ , EtOAc);  $^1\text{H}$  NMR (400 MHz,  $\text{CDCl}_3$ )  $\delta$  7.40 (d,  $J = 7.6$  Hz, 1H), 7.13-7.08 (m, 1H), 6.86-6.81 (m, 1H), 6.79 (br., s, 1H), 6.73 (d,  $J = 7.6$  Hz, 1H), 5.61 (br., s, 1H), 4.04 (s, 1H), 2.05-1.40 (m, 10H);  $^{13}\text{C}$  NMR (100 MHz,  $\text{CDCl}_3$ )  $\delta$  174.6, 148.0, 136.9, 127.7, 125.2, 120.1, 110.5, 73.1, 48.8, 36.8, 32.4, 25.4, 22.7, 21.5; HRMS (ESI) calcd for  $\text{C}_{14}\text{H}_{19}\text{N}_2\text{O}^+$  ( $\text{M}+\text{H}$ ) $^+$  231.14919, found 231.14835.

## References

- 1 (a) J. Ye, D. J. Dixon and P. S. Hynes, *Chem. Commun.*, 2005, 4481; (b) B. Vakulya, S. Varga, A. Csámpai and T. Soós, *Org. Lett.*, 2005, **7**, 1967; (c) S. H. McCooey and S. J. Connon, *Angew. Chem., Int. Ed.*, 2005, **44**, 6367; (d) J. Luo, L.-W. Xu, R. A. S. Hay and Y. Lu, *Org. Lett.*, 2009, **11**, 437.
- 2 K. G. Liu and A. J. Robichaud, *Tetrahedron Lett.*, 2007, **48**, 461.
- 3 M. Watzke, K. Schulz, K. Johannes, P. Ullrich and J. Martens, *Eur. J. Org. Chem.*, 2008, 3859.
- 4 K. Funabashi, H. Ratni, M. Kanai and M. Shibasaki, *J. Am. Chem. Soc.*, 2001, **123**, 10784.

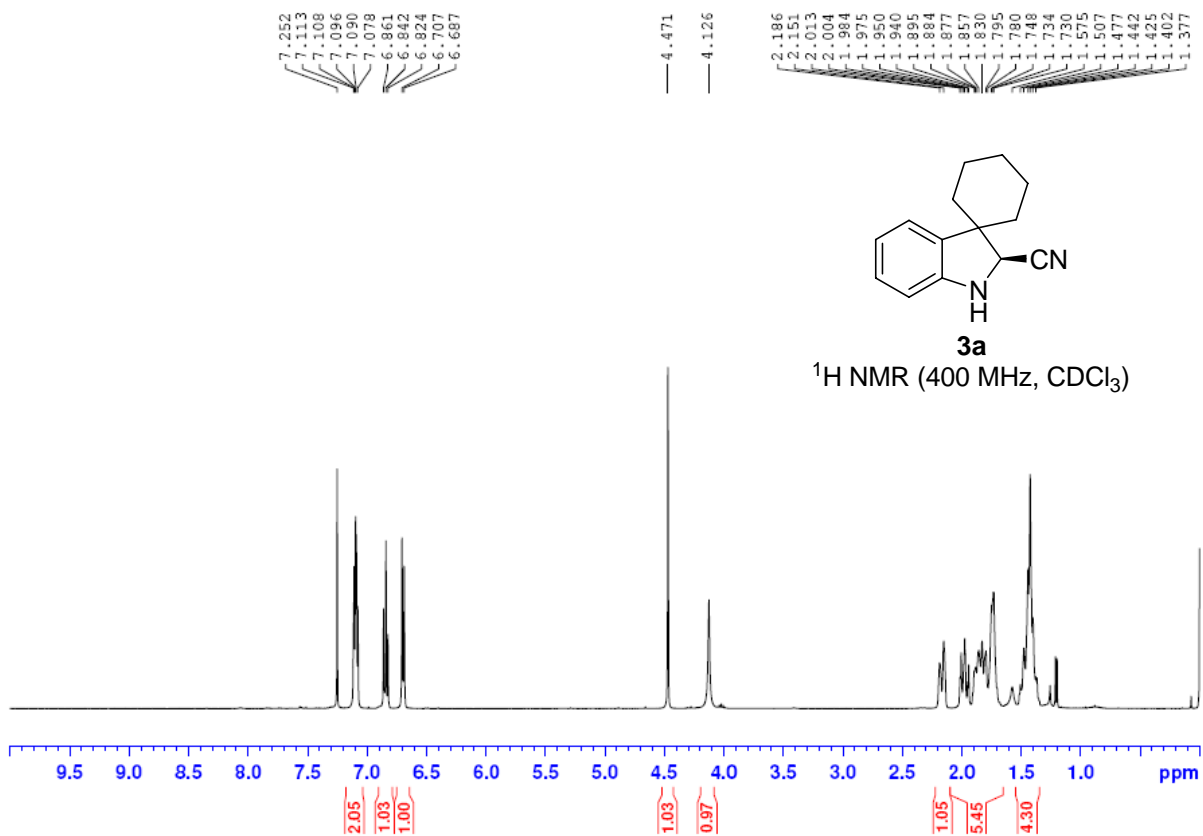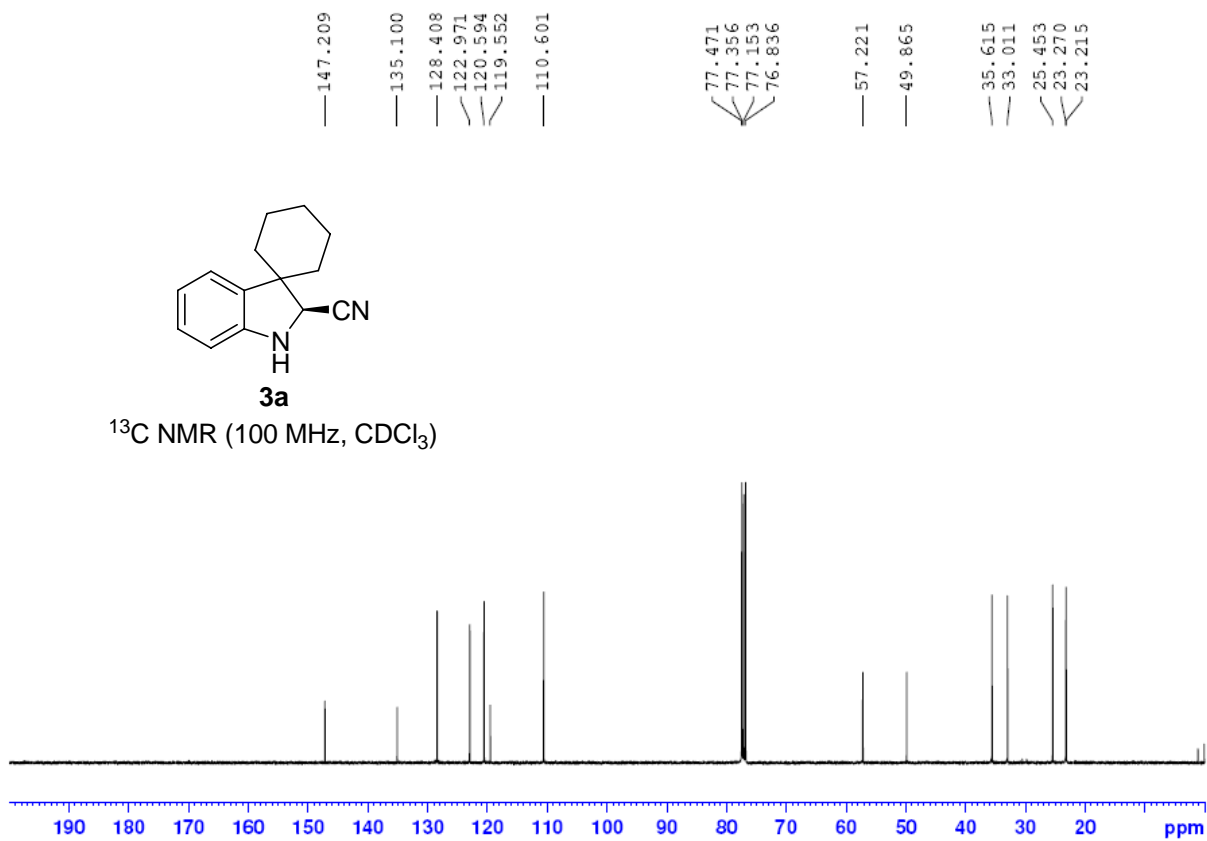

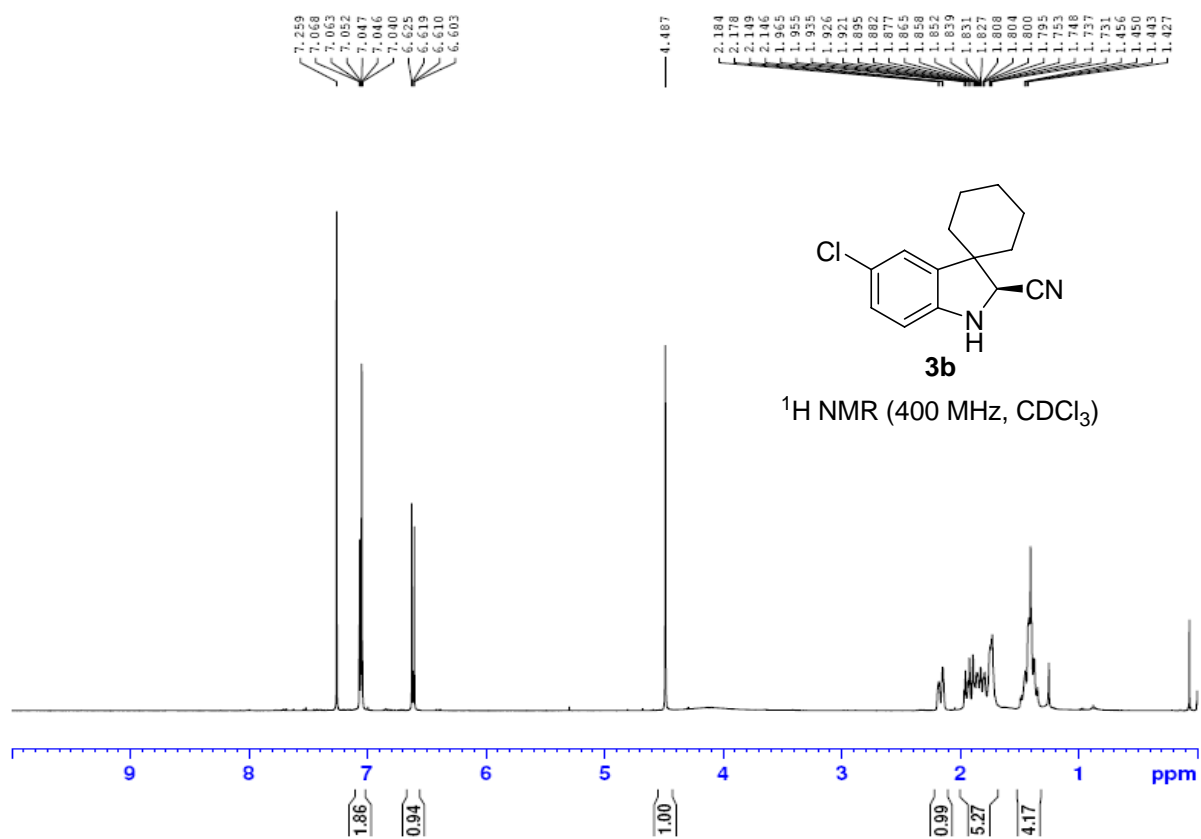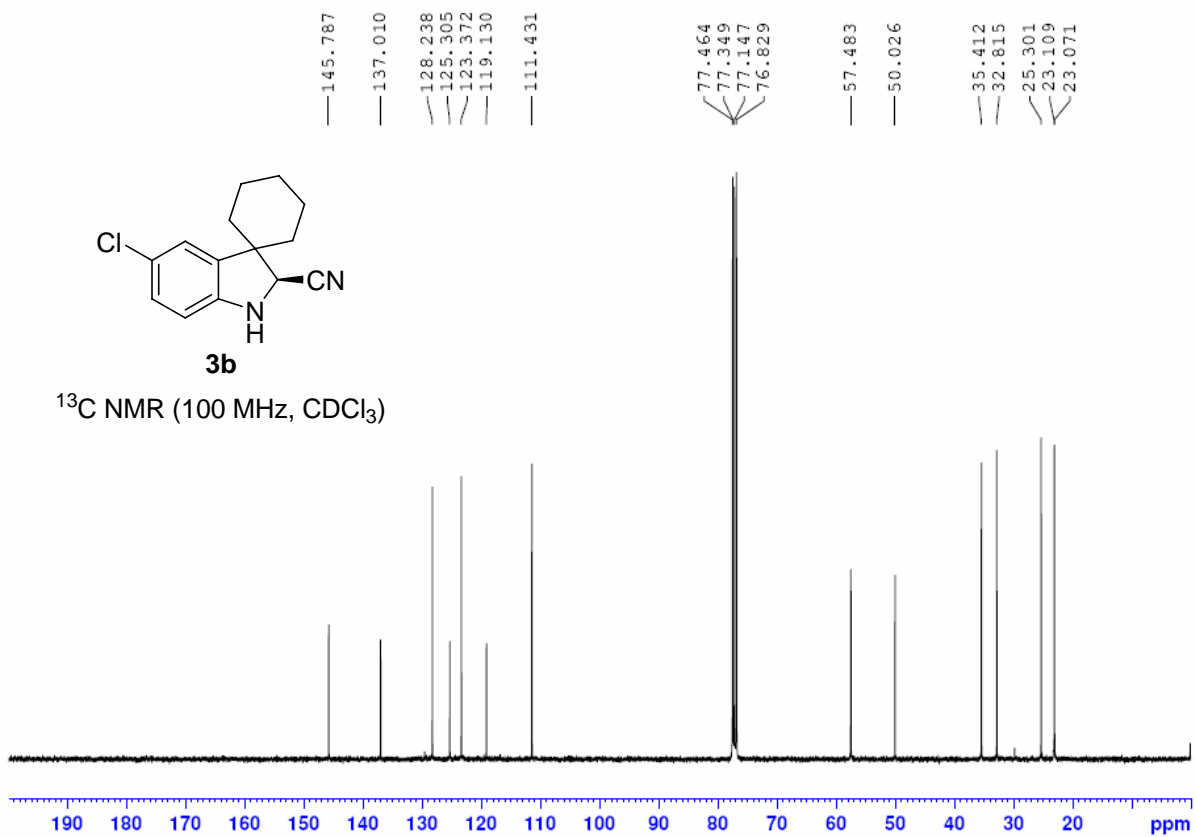



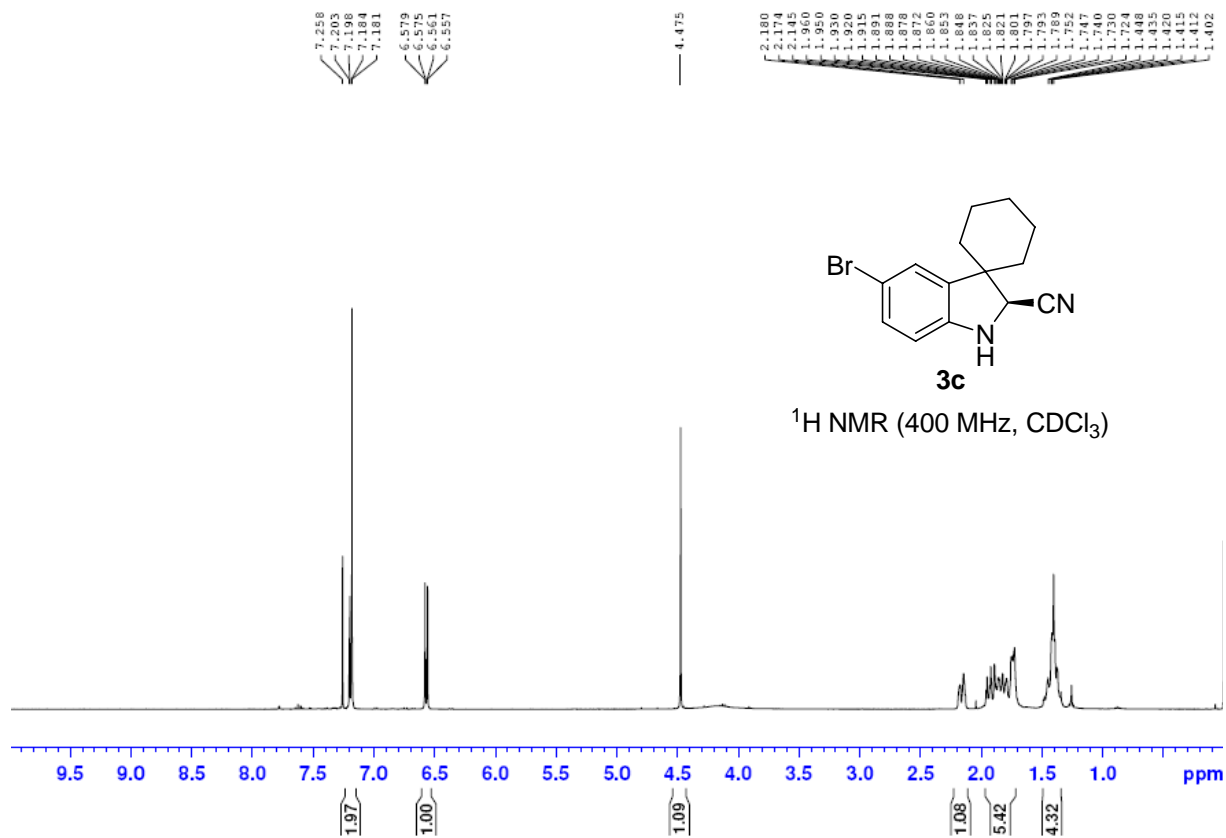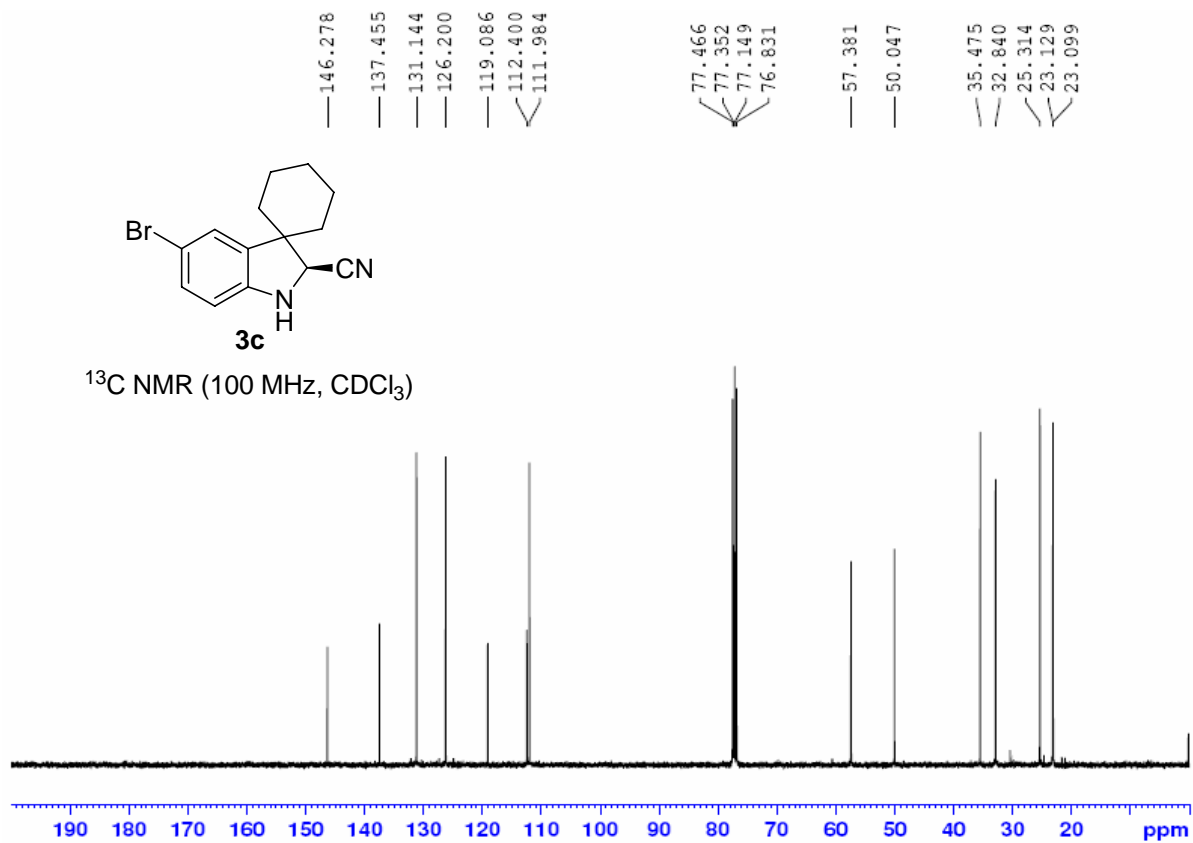

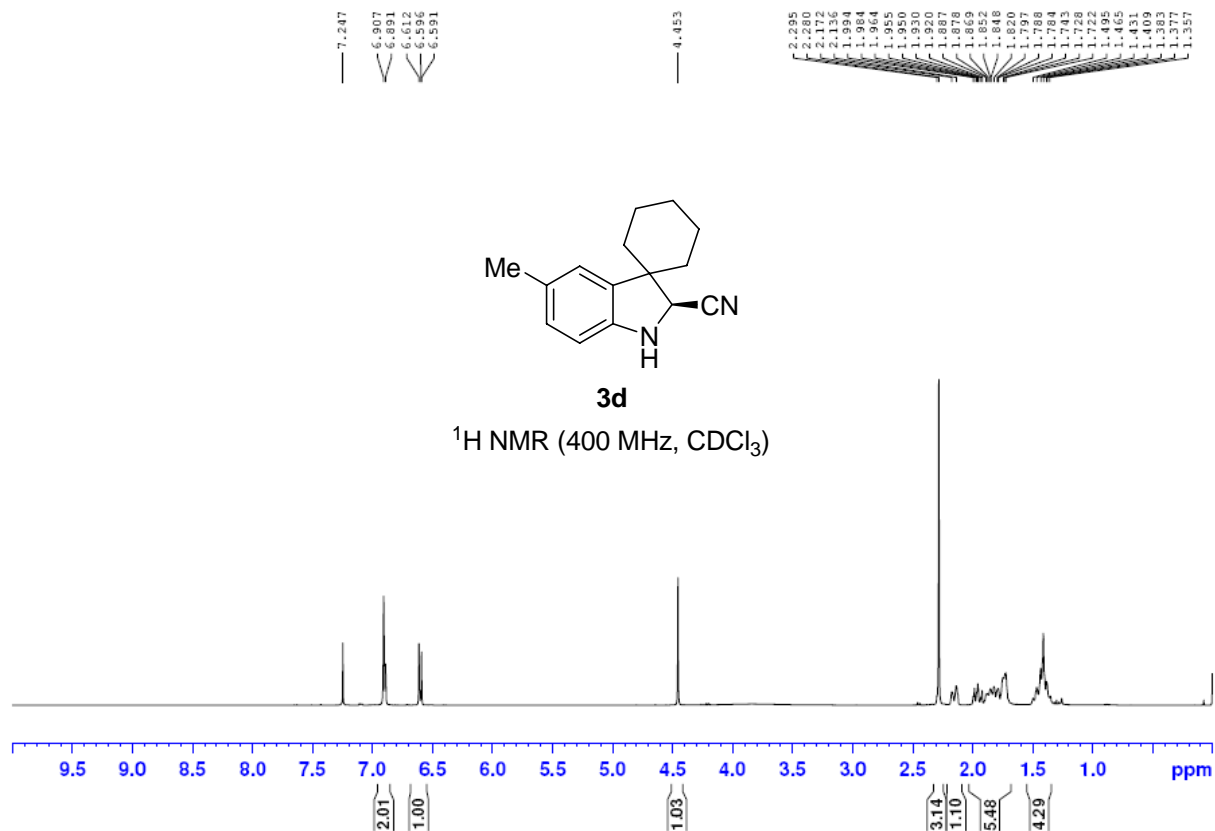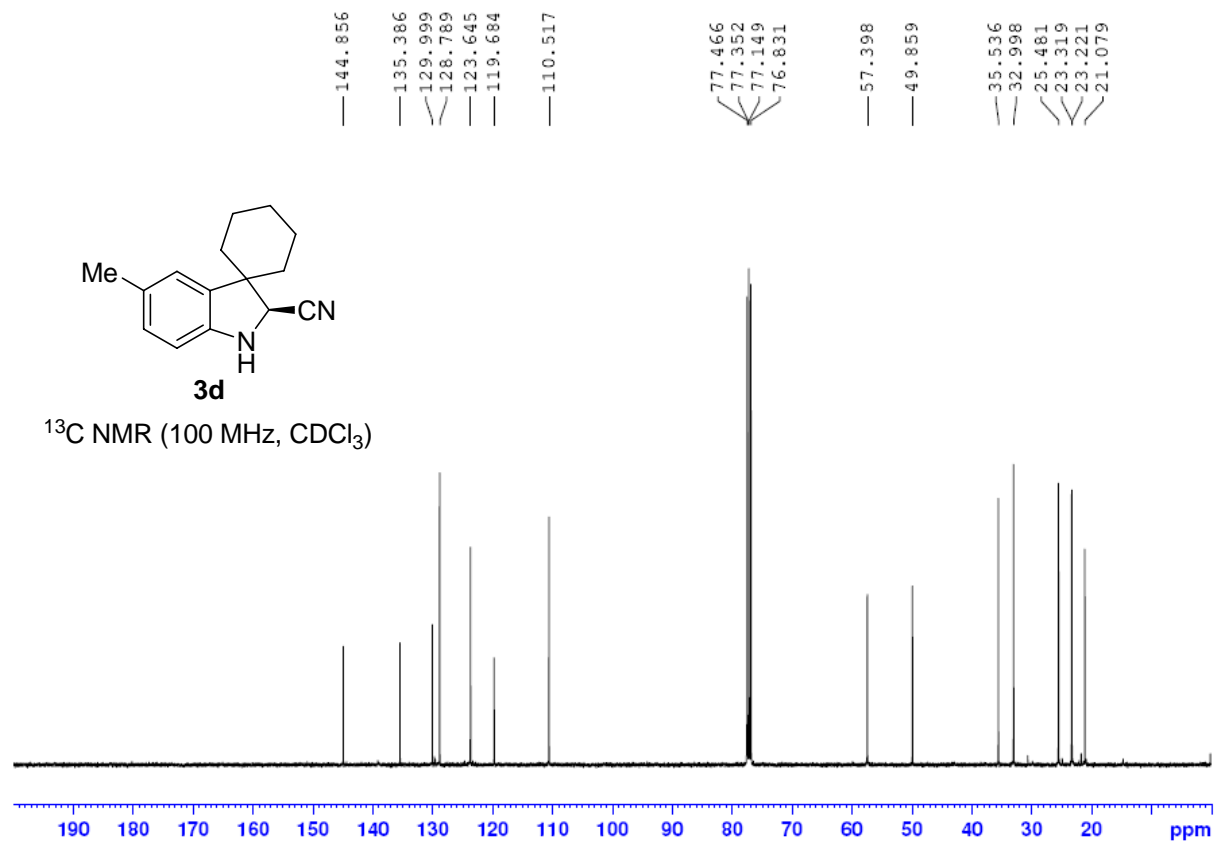

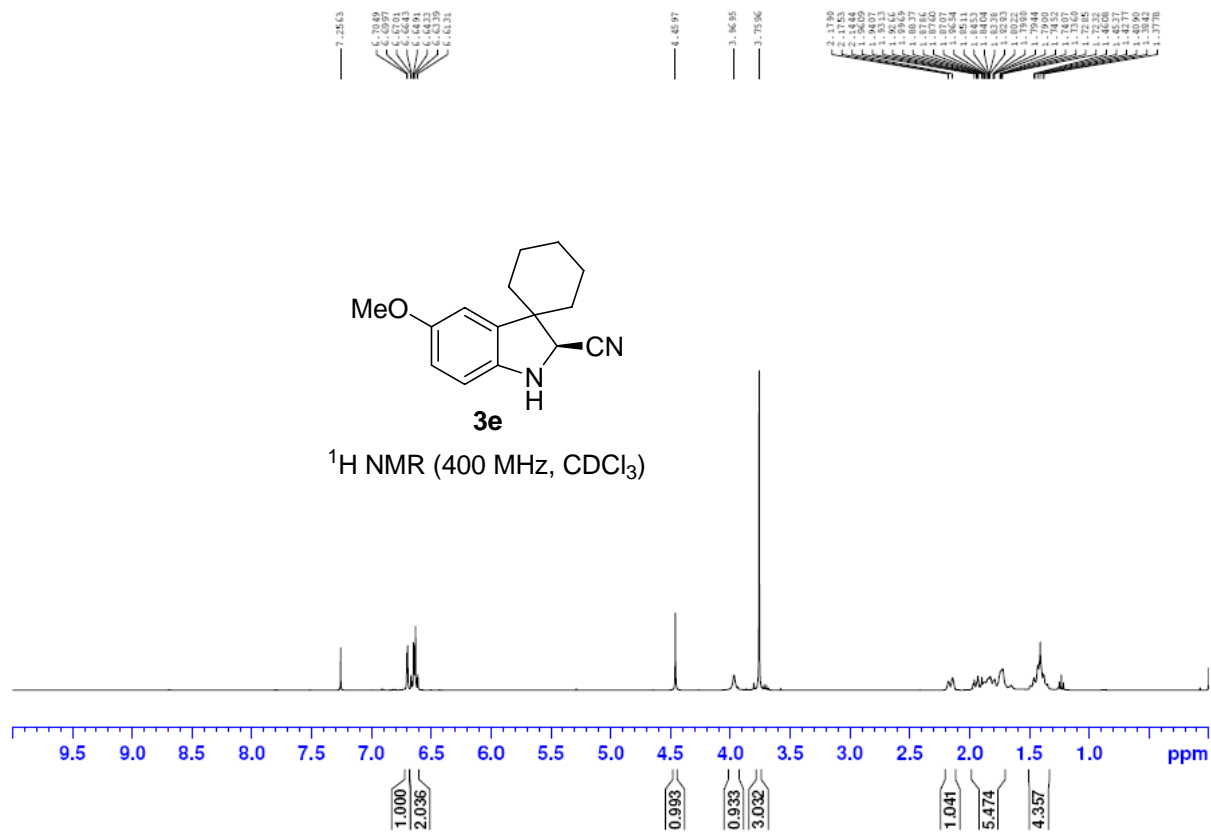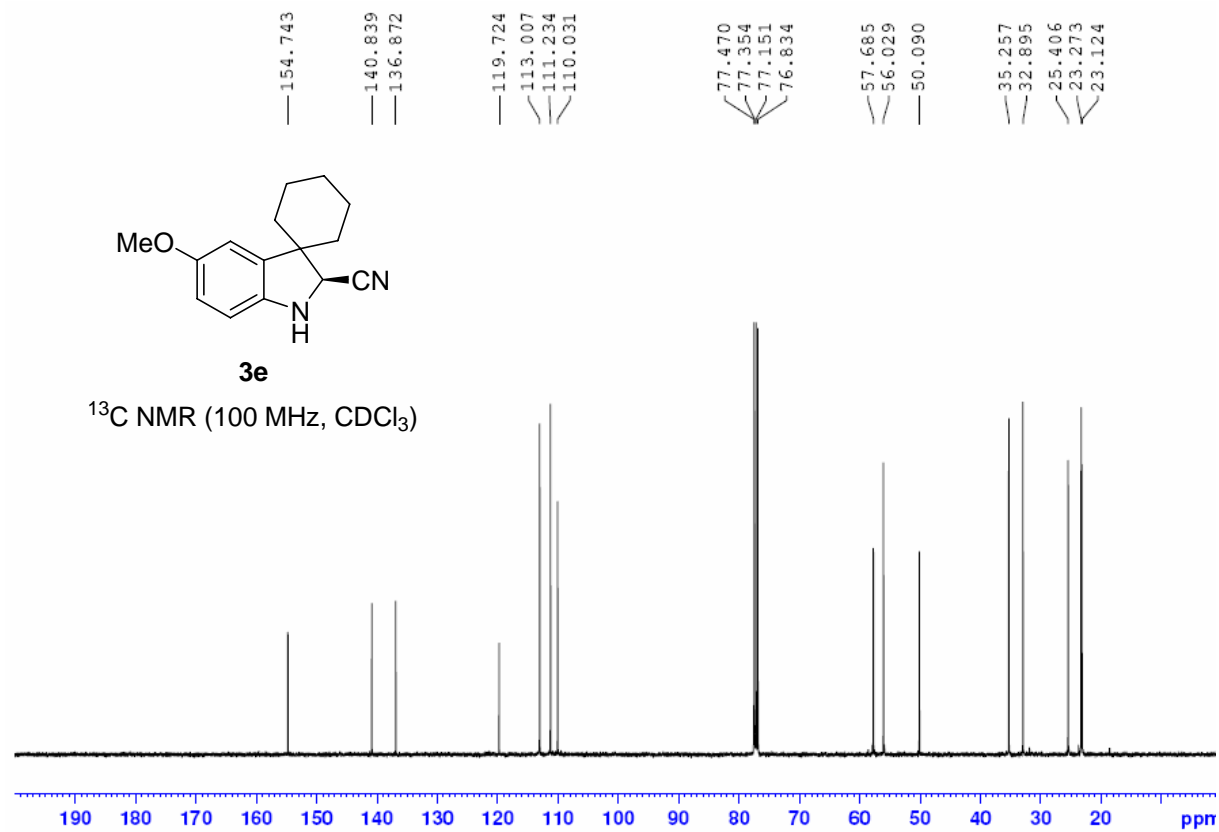

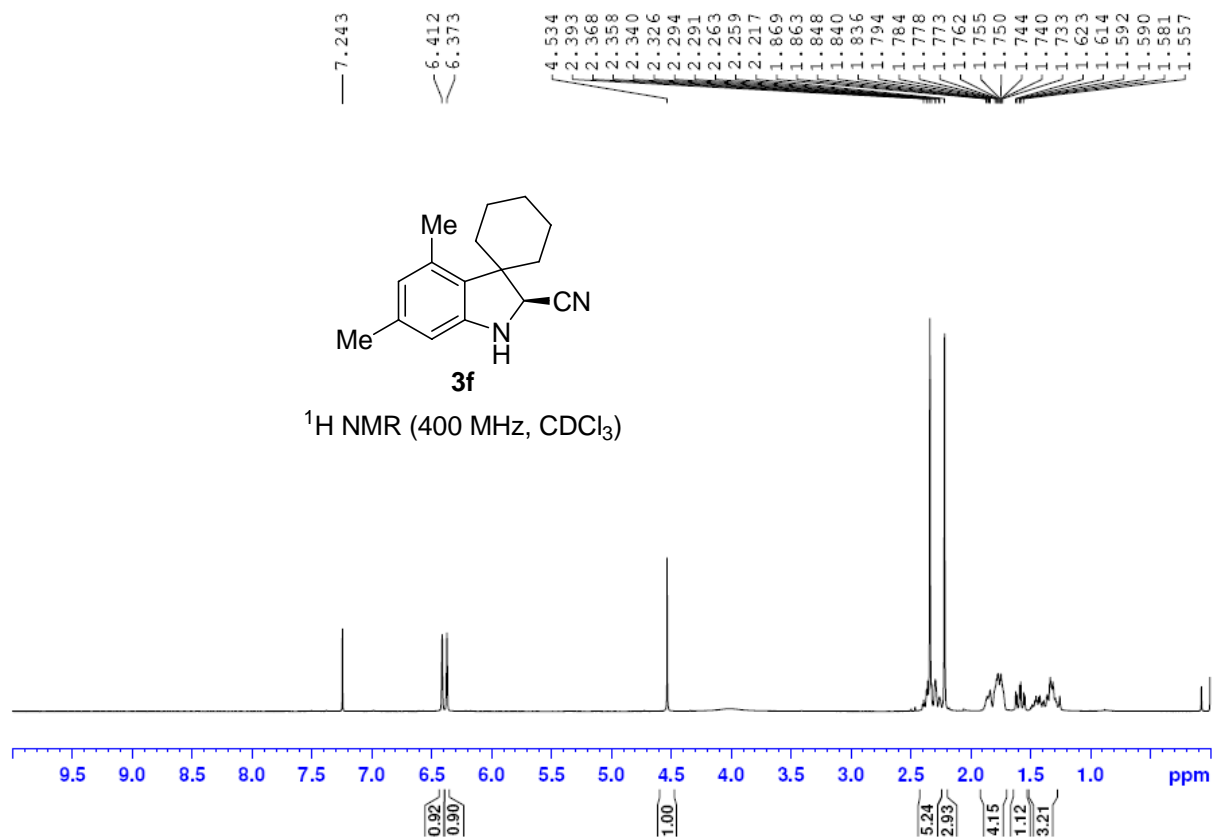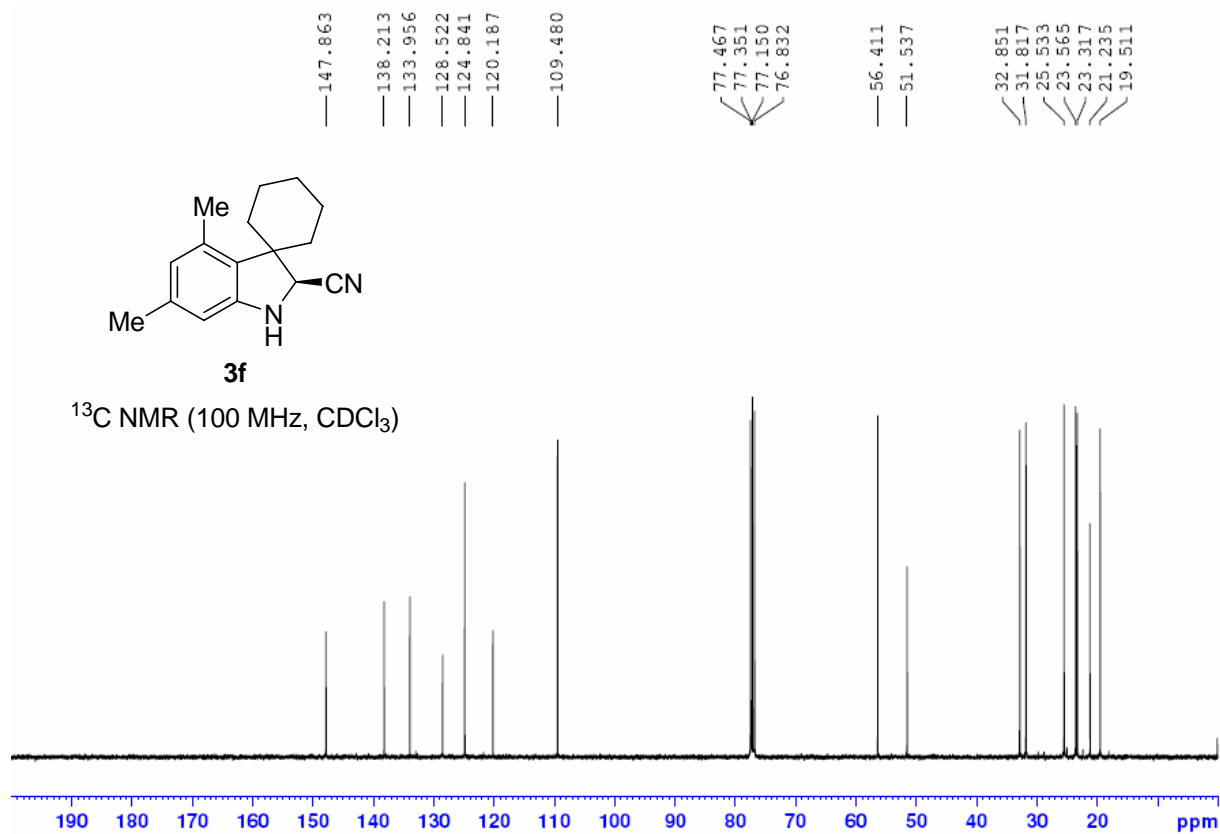

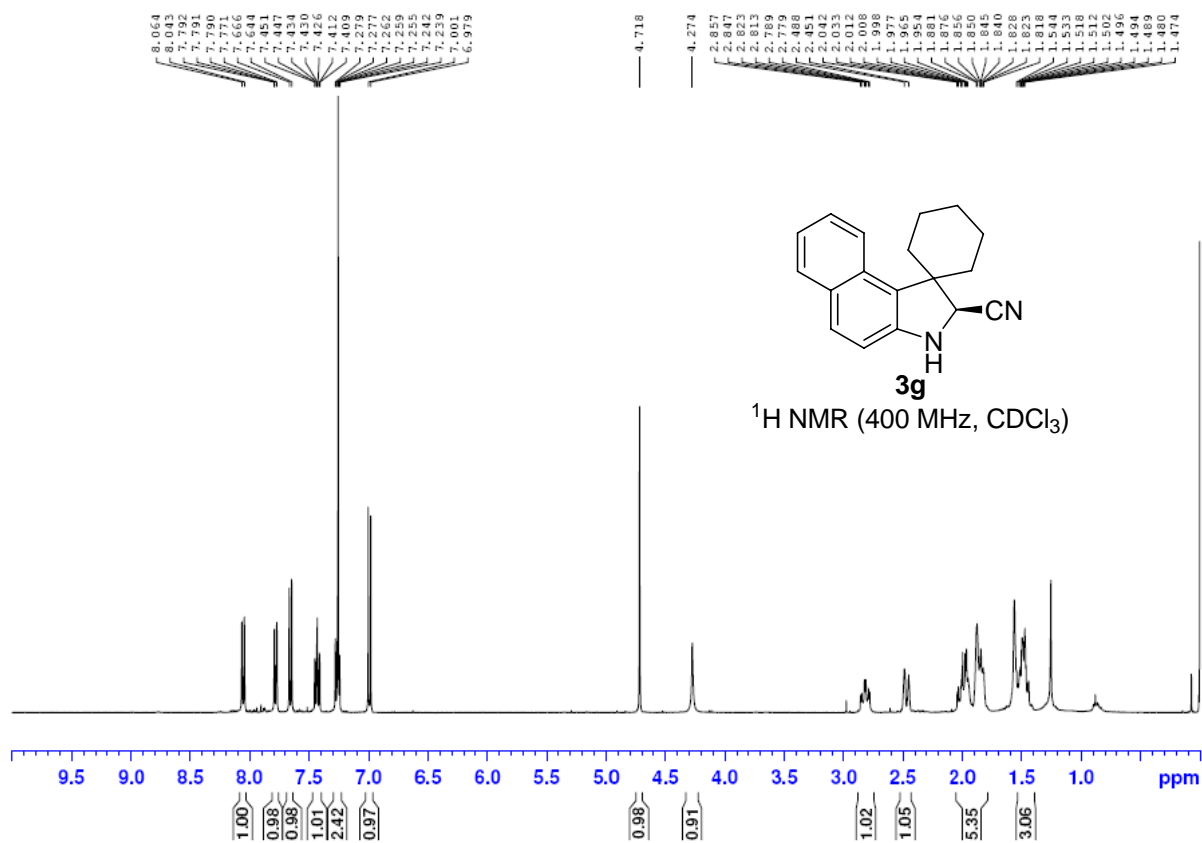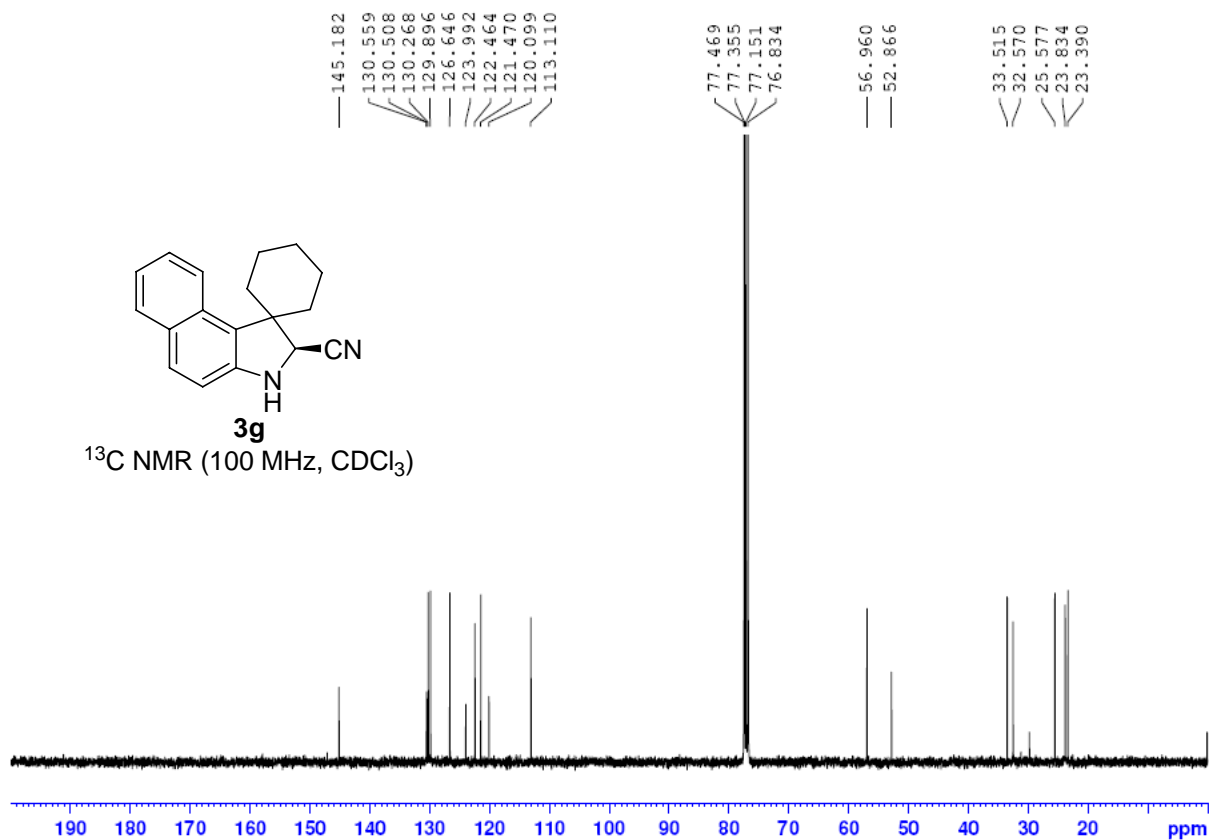

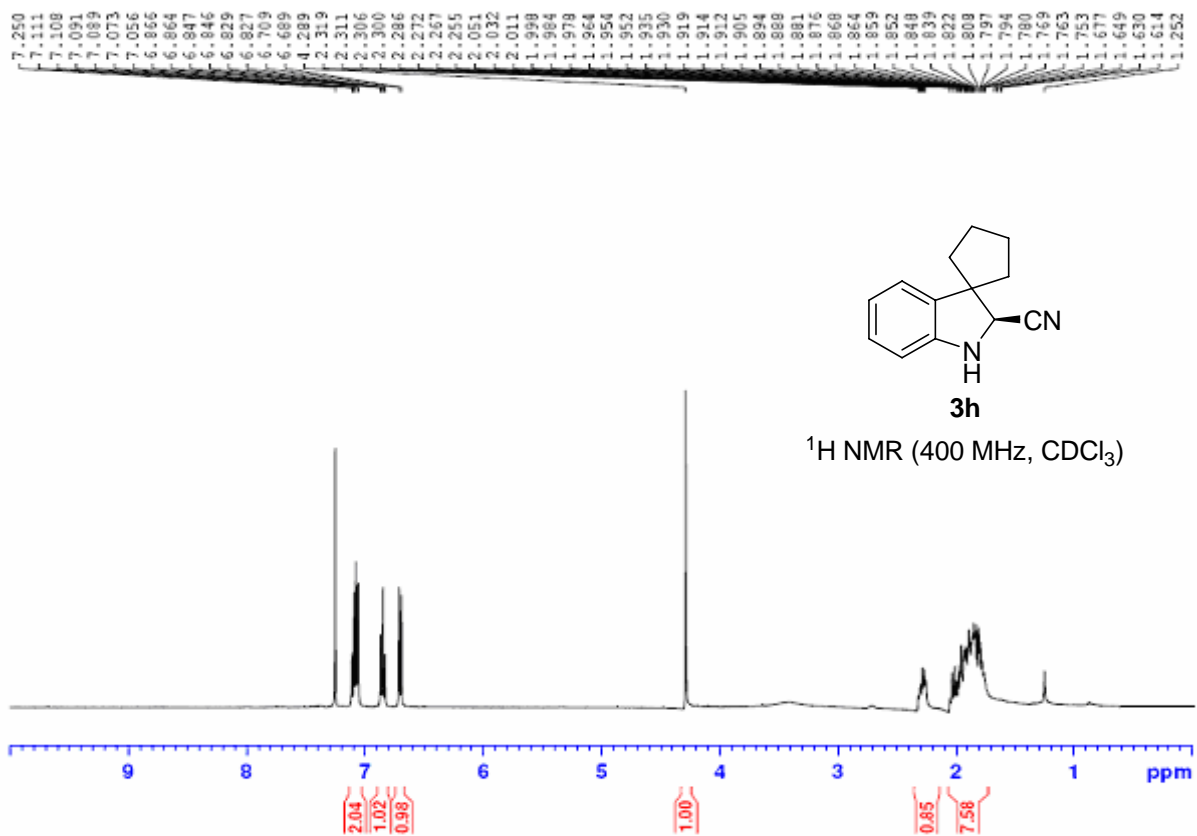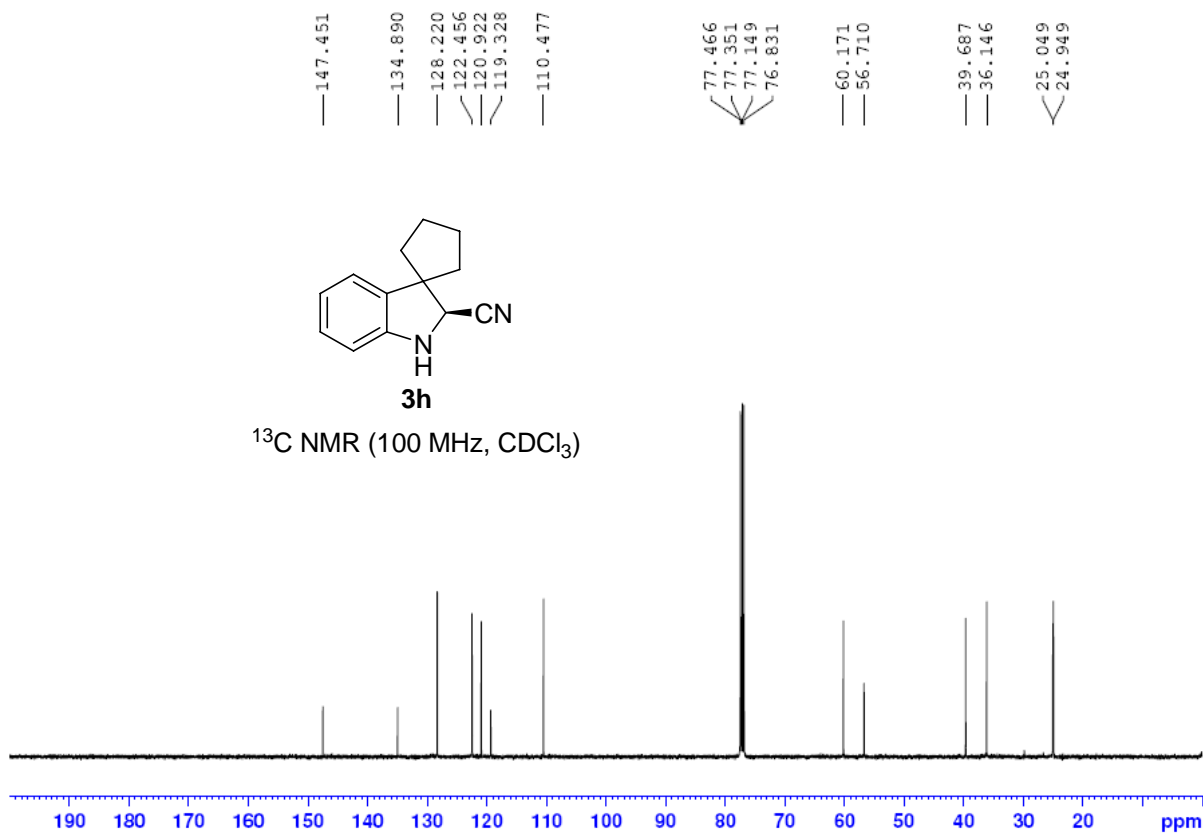

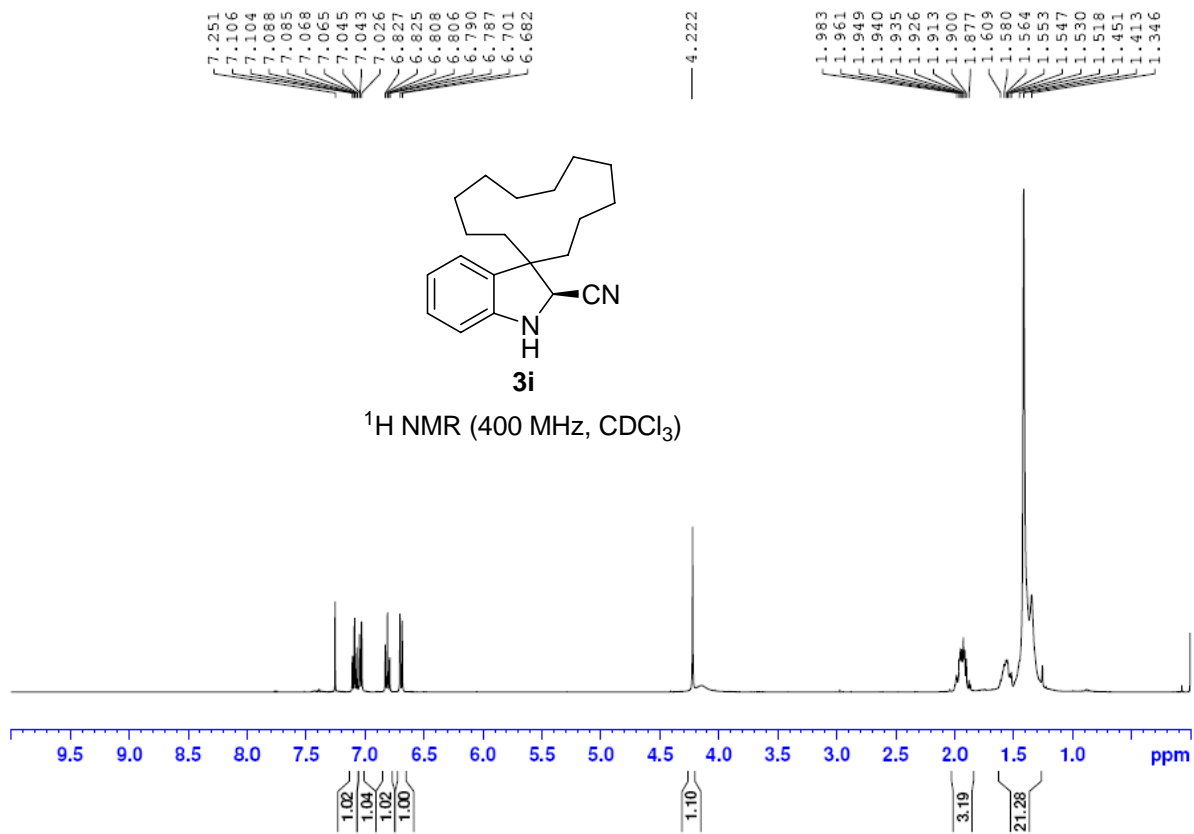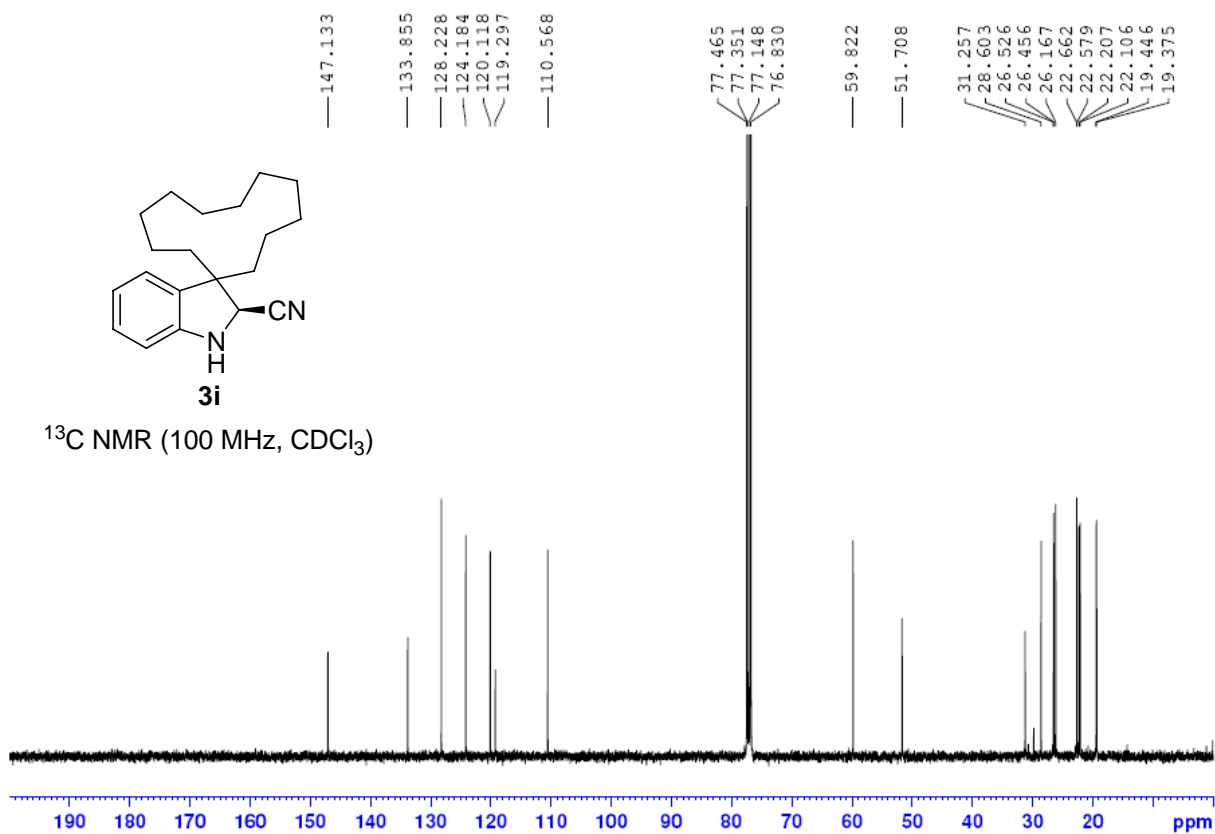

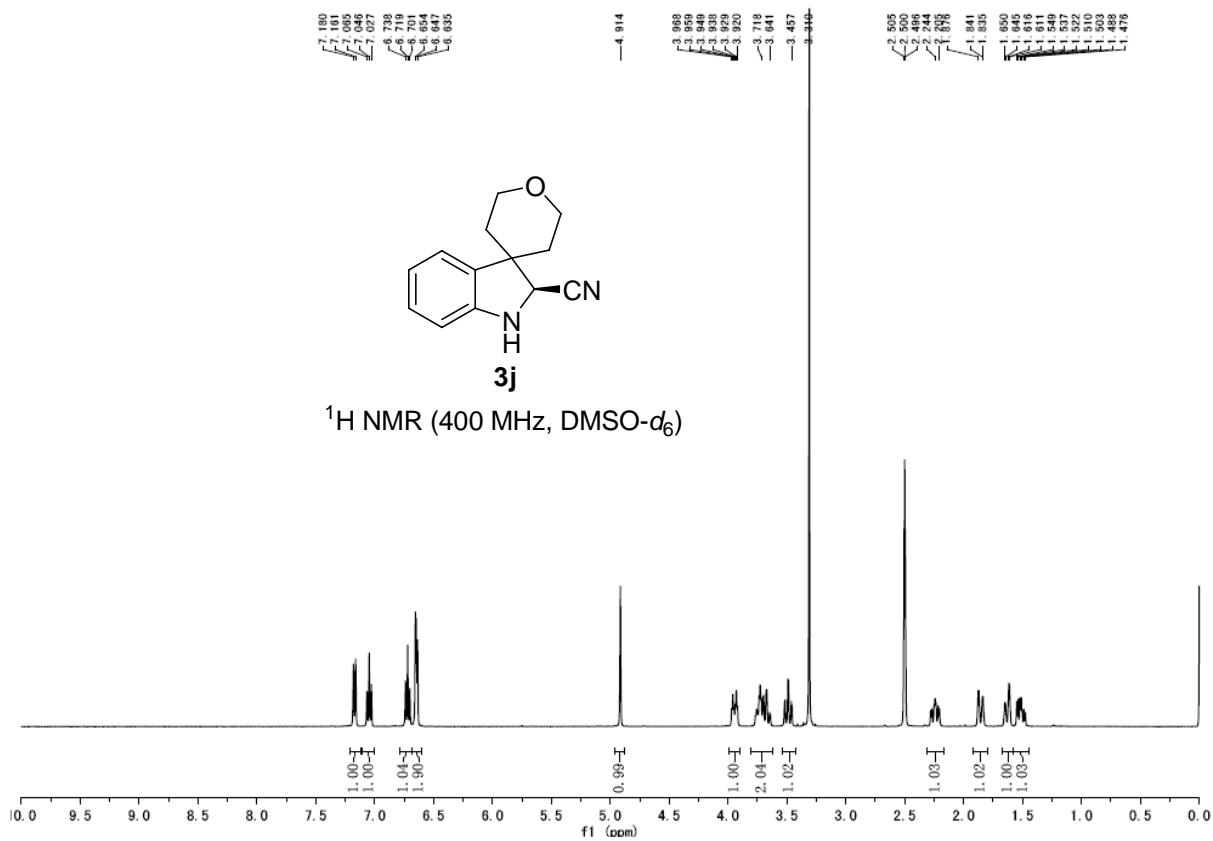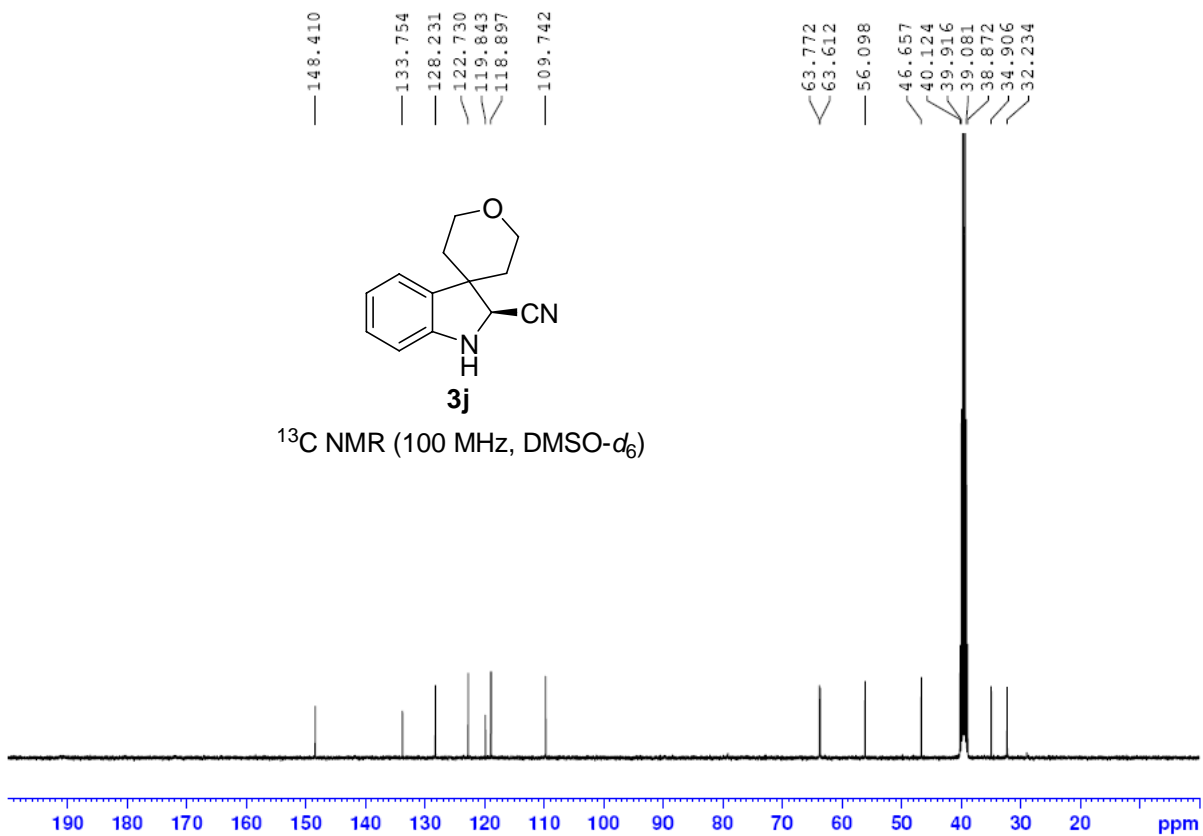



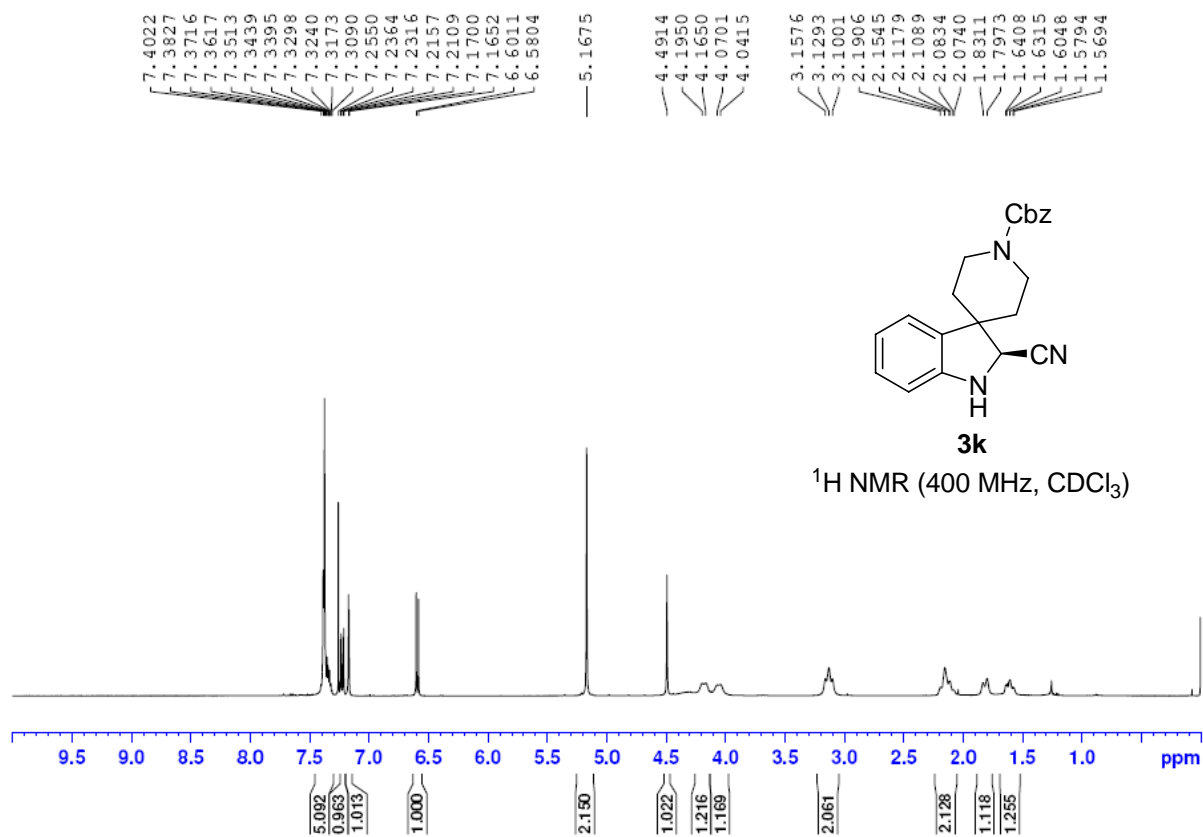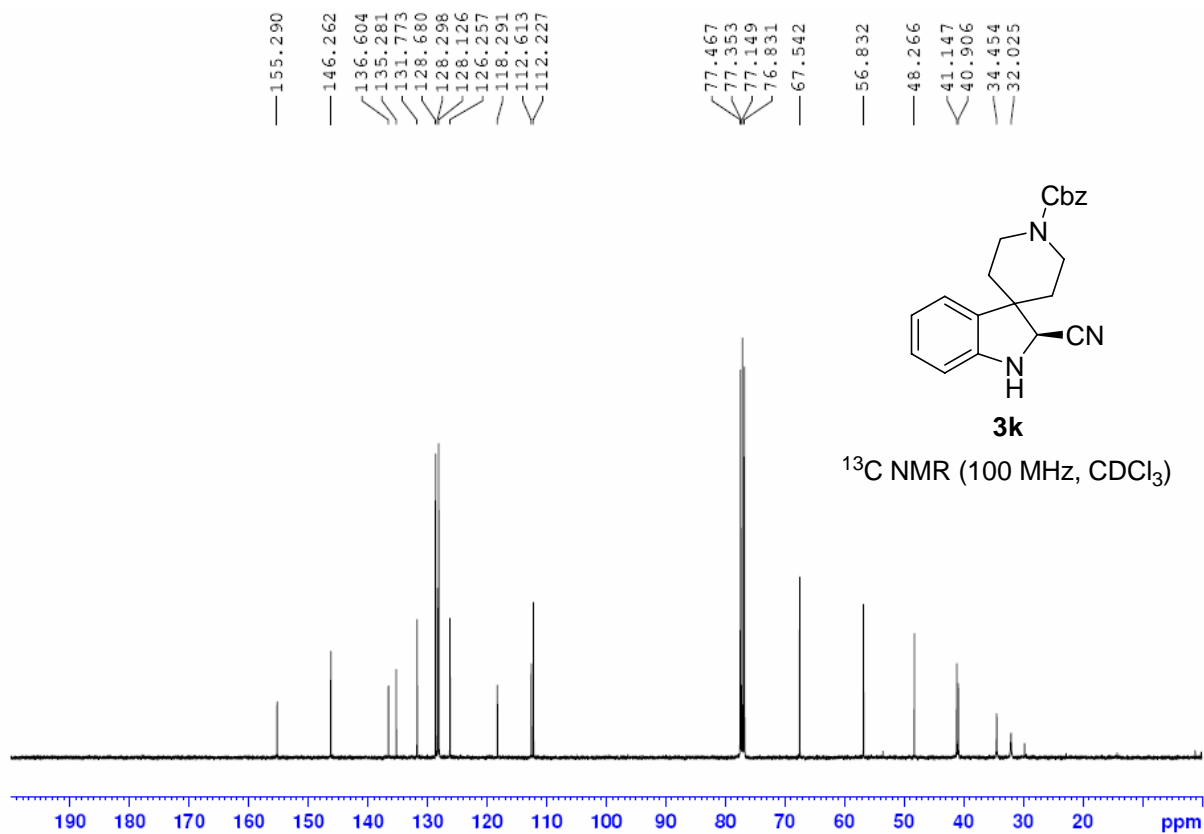

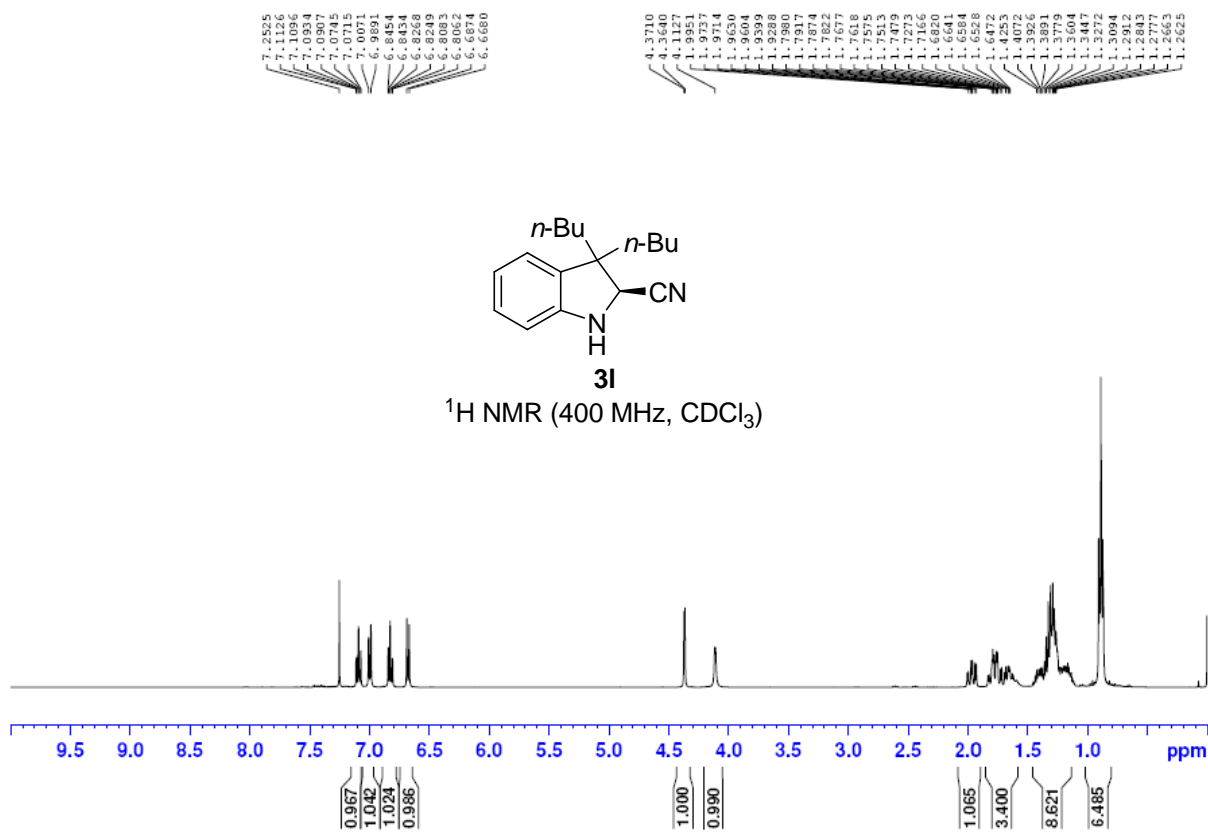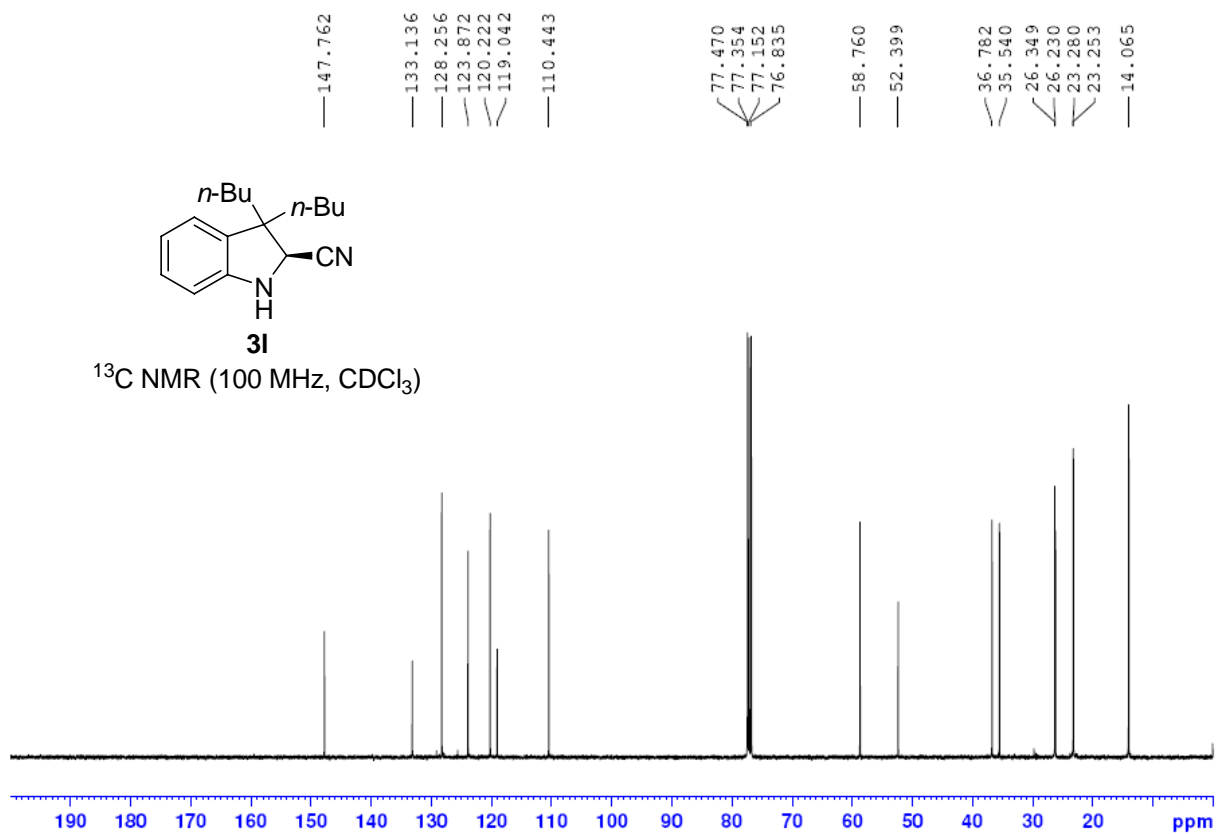

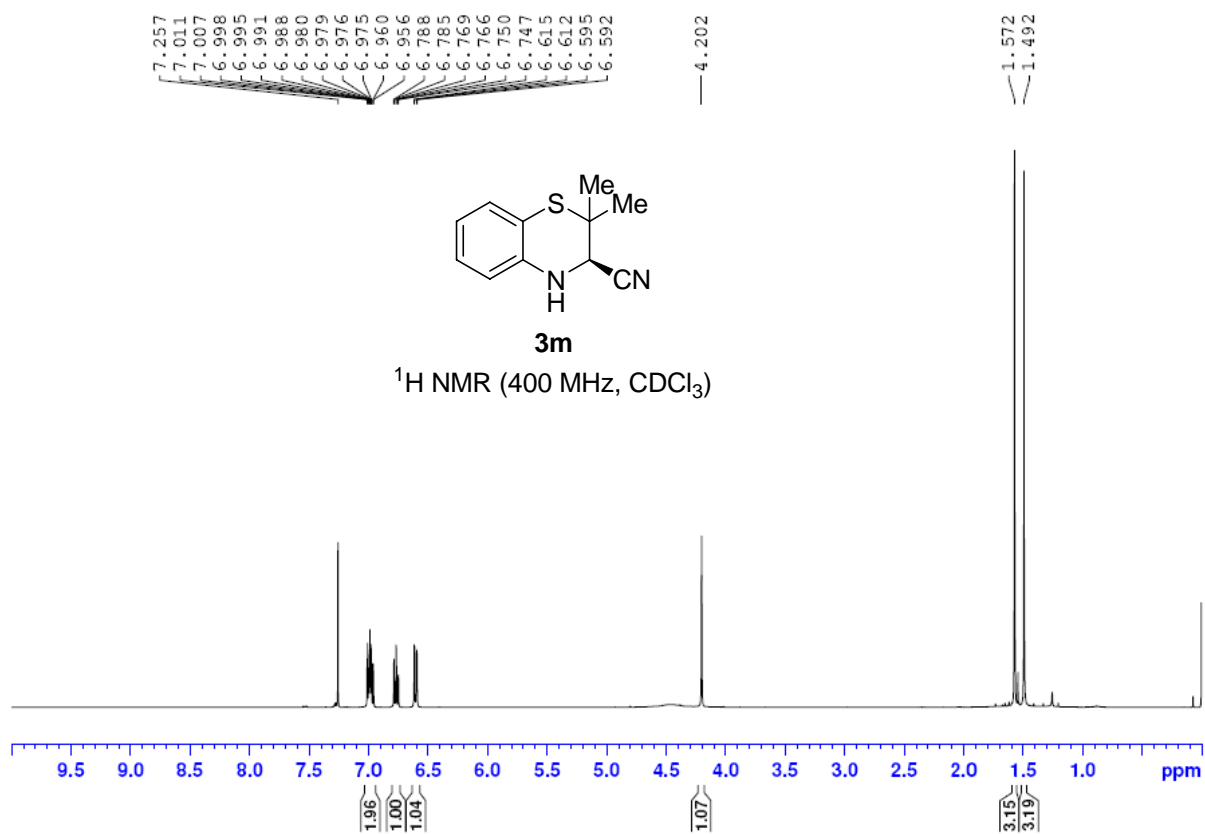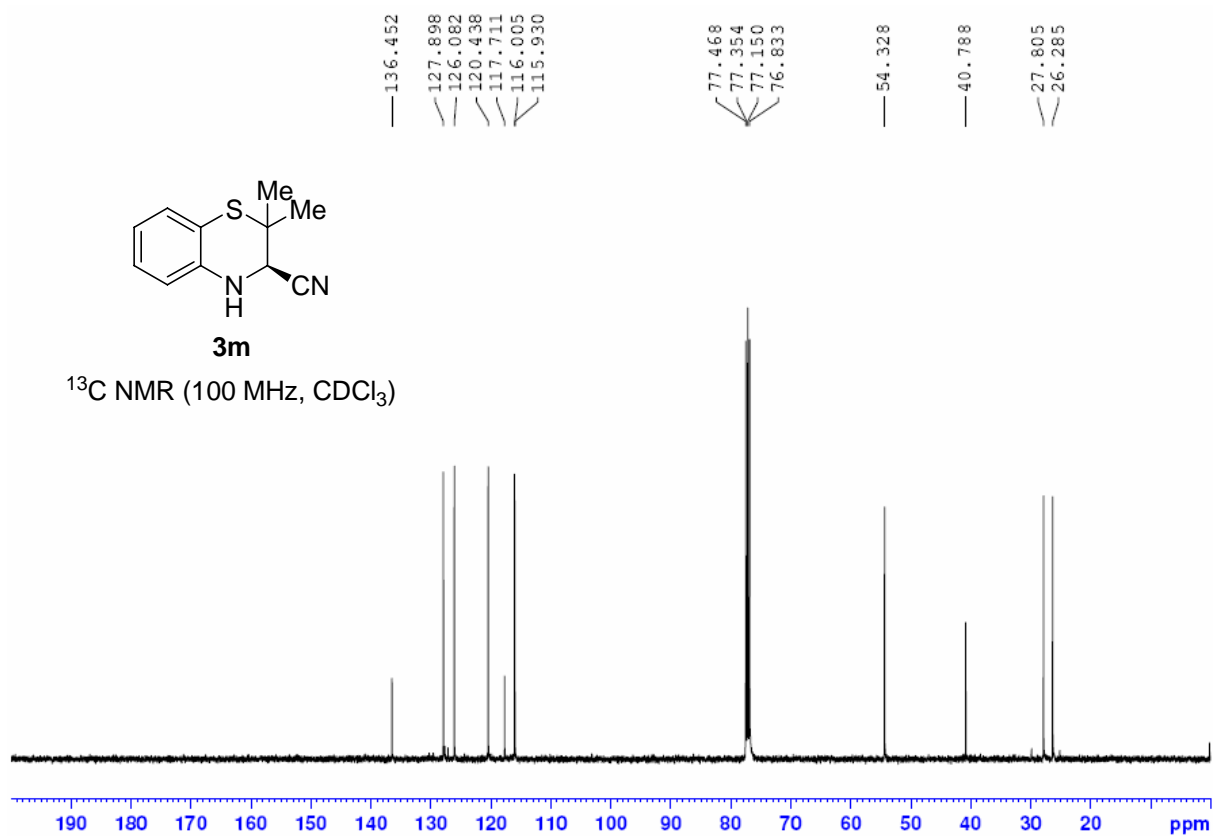

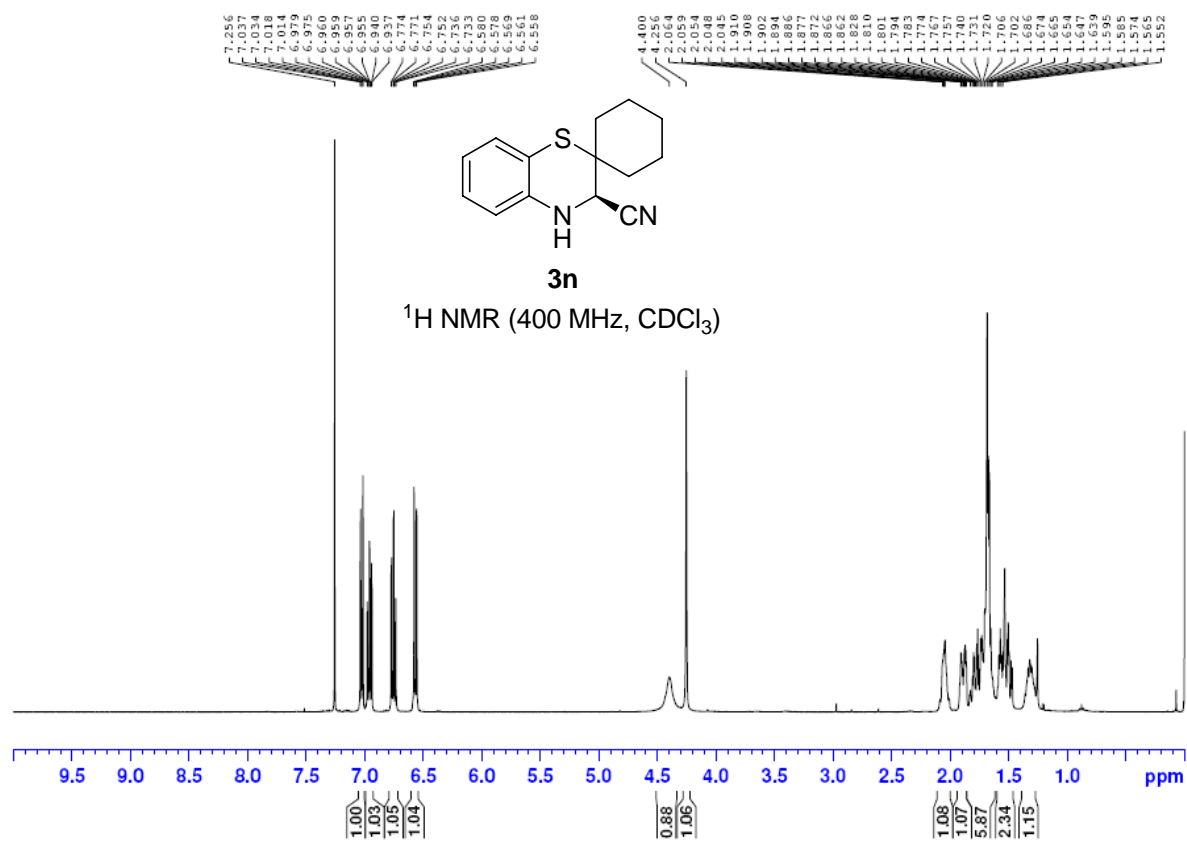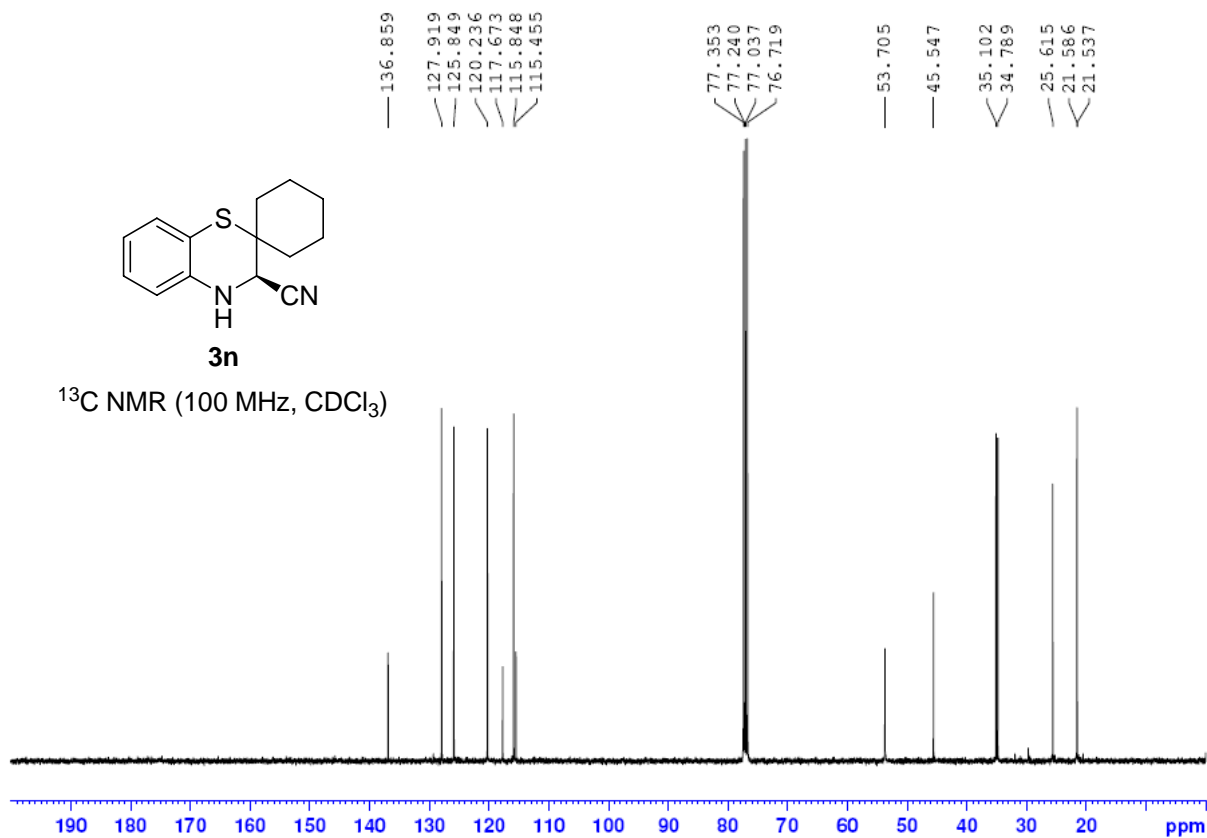

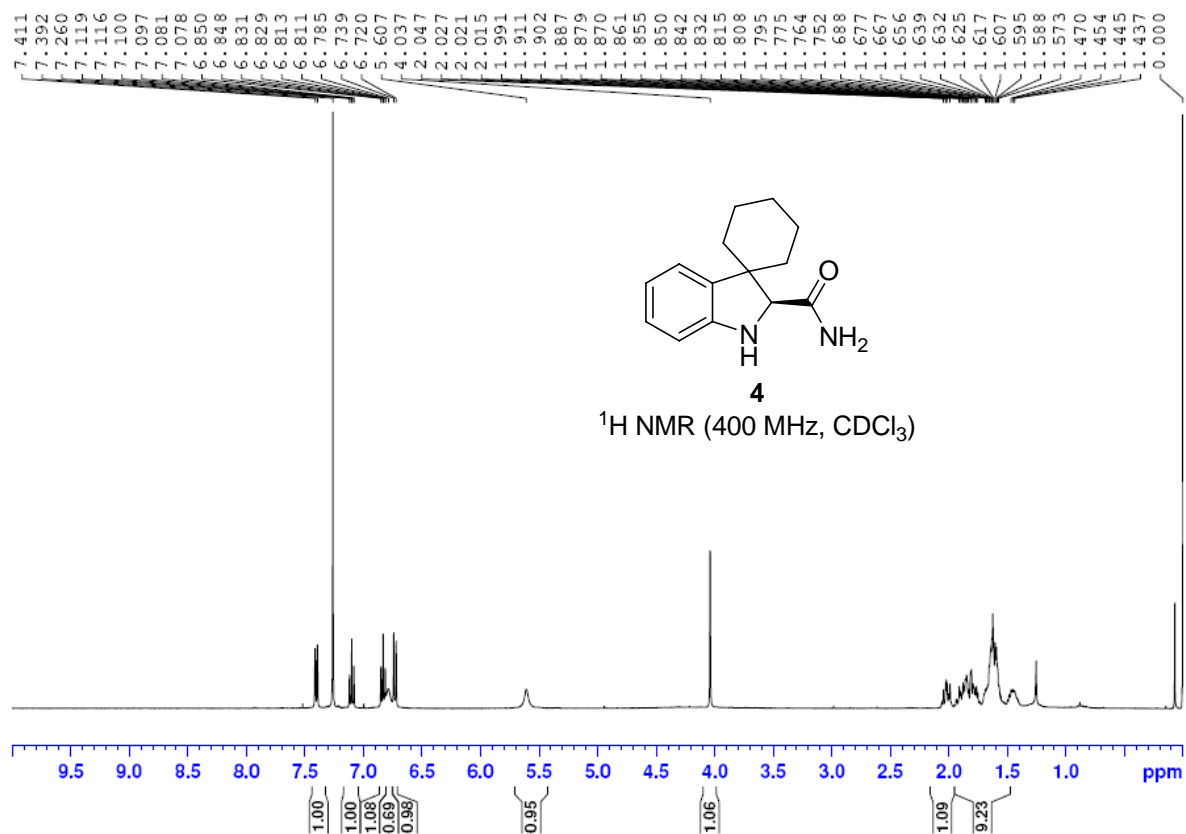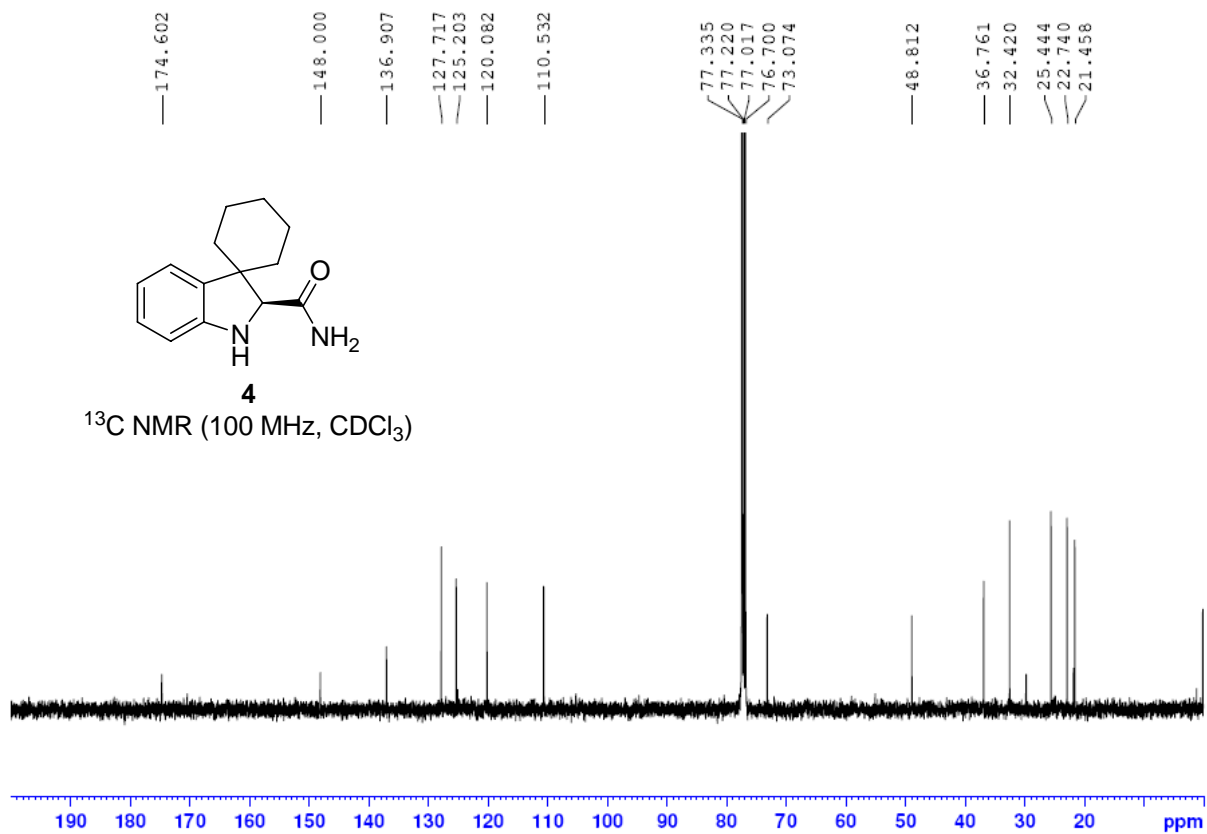

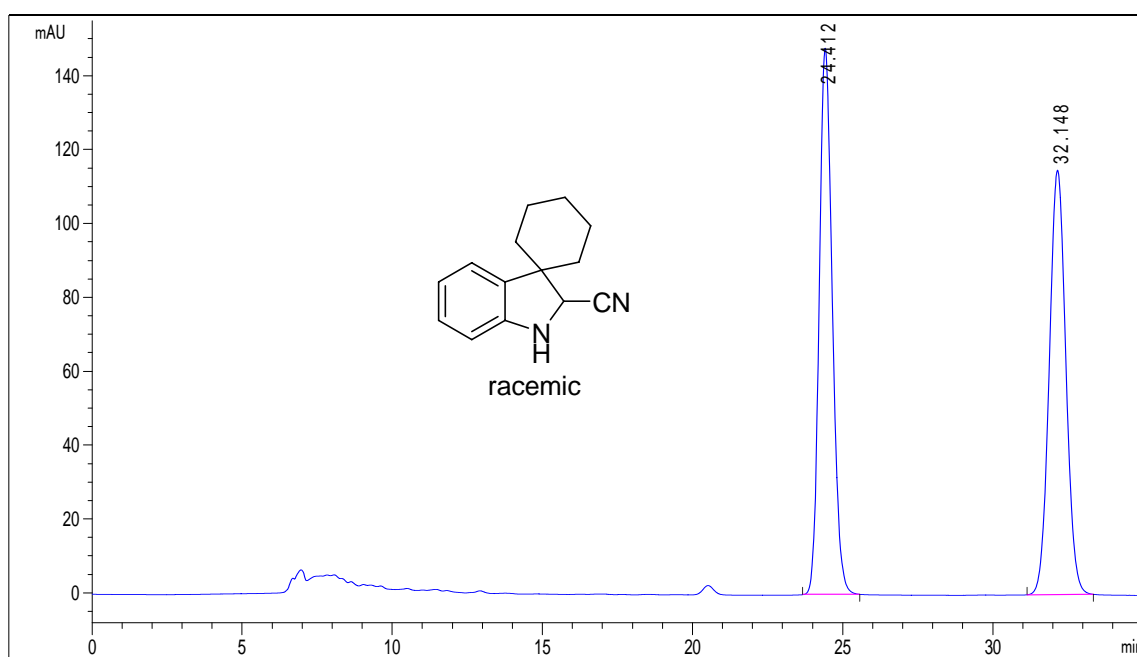

| Number | Time (min) | Area (mAU·s) | Height (mAU) | Width (min) | Symmetry factor | Area (%) |
|--------|------------|--------------|--------------|-------------|-----------------|----------|
| 1      | 24.412     | 4472.1       | 148          | 0.4676      | 0.809           | 50.327   |
| 2      | 32.148     | 4413.9       | 115          | 0.5965      | 0.947           | 49.673   |

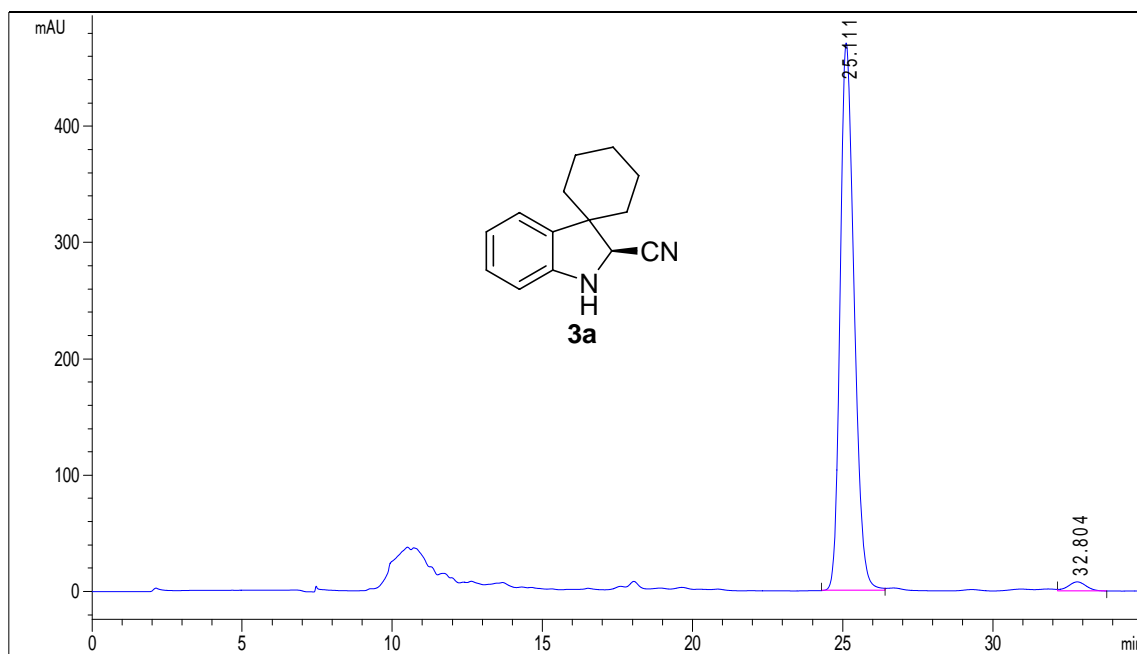

| Number | Time (min) | Area (mAU·s) | Height (mAU) | Width (min) | Symmetry factor | Area (%) |
|--------|------------|--------------|--------------|-------------|-----------------|----------|
| 1      | 25.111     | 15279.4      | 470.9        | 0.5008      | 0.715           | 97.900   |
| 2      | 32.804     | 327.7        | 7.8          | 0.6366      | 0.991           | 2.100    |

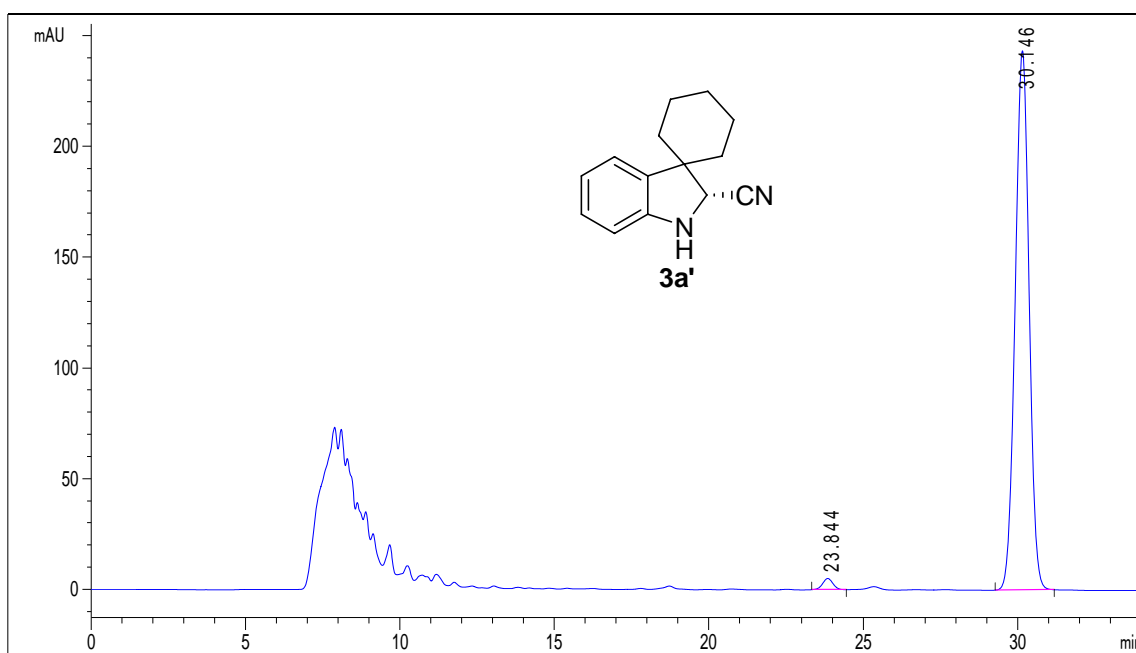

| Number | Time (min) | Area (mAU·s) | Height (mAU) | Width (min) | Symmetry factor | Area (%) |
|--------|------------|--------------|--------------|-------------|-----------------|----------|
| 1      | 23.844     | 119.1        | 5.1          | 0.3607      | 0.991           | 1.547    |
| 2      | 30.146     | 7578.6       | 243.4        | 0.487       | 1.038           | 98.453   |

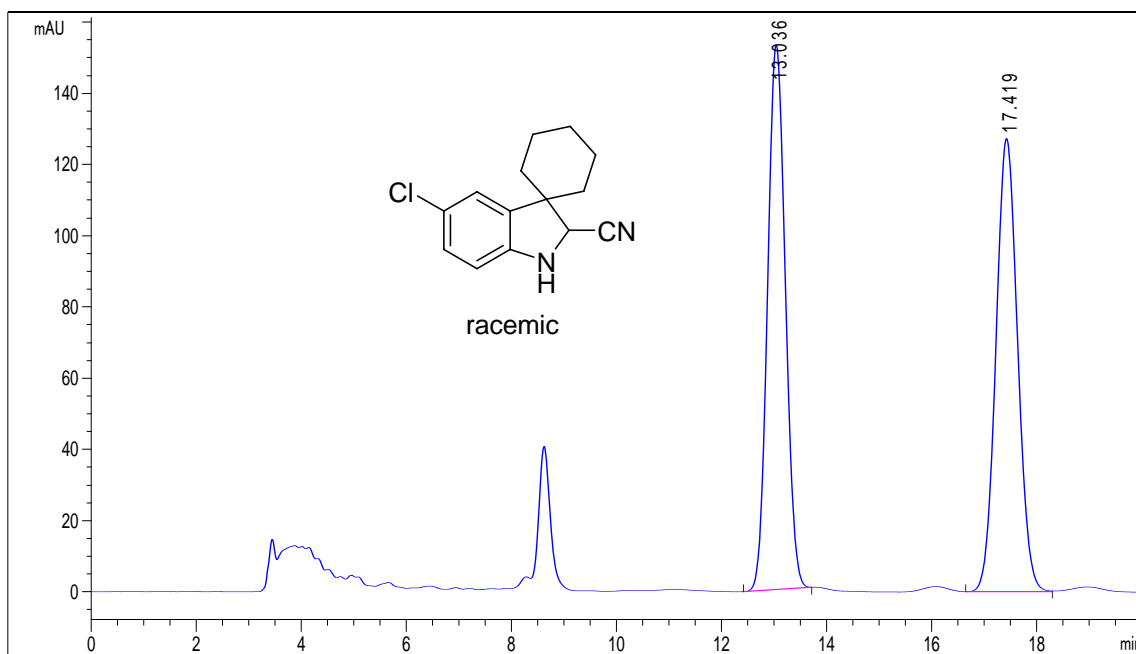

| Number | Time (min) | Area (mAU·s) | Height (mAU) | Width (min) | Symmetry factor | Area (%) |
|--------|------------|--------------|--------------|-------------|-----------------|----------|
| 1      | 13.036     | 3591.1       | 153          | 0.3685      | 0.905           | 49.654   |
| 2      | 17.419     | 3641.1       | 127.4        | 0.4457      | 0.917           | 50.346   |

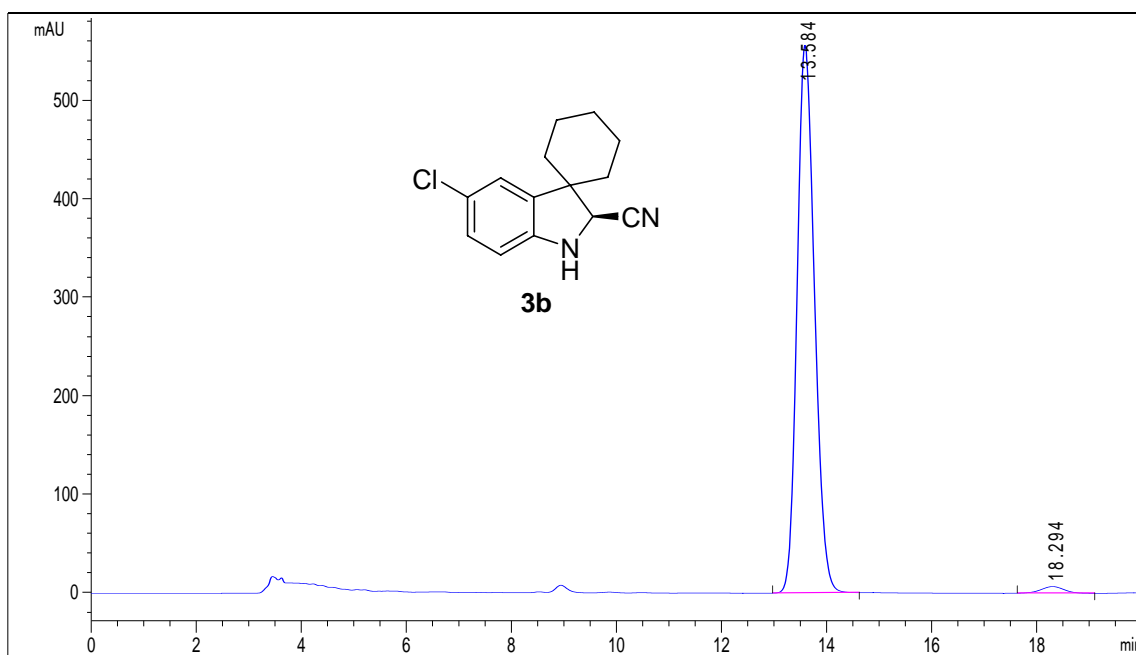

| Number | Time (min) | Area (mAU·s) | Height (mAU) | Width (min) | Symmetry factor | Area (%) |
|--------|------------|--------------|--------------|-------------|-----------------|----------|
| 1      | 13.584     | 12826.5      | 556.2        | 0.3579      | 0.787           | 98.406   |
| 2      | 18.294     | 207.7        | 6.8          | 0.4688      | 1.005           | 1.594    |

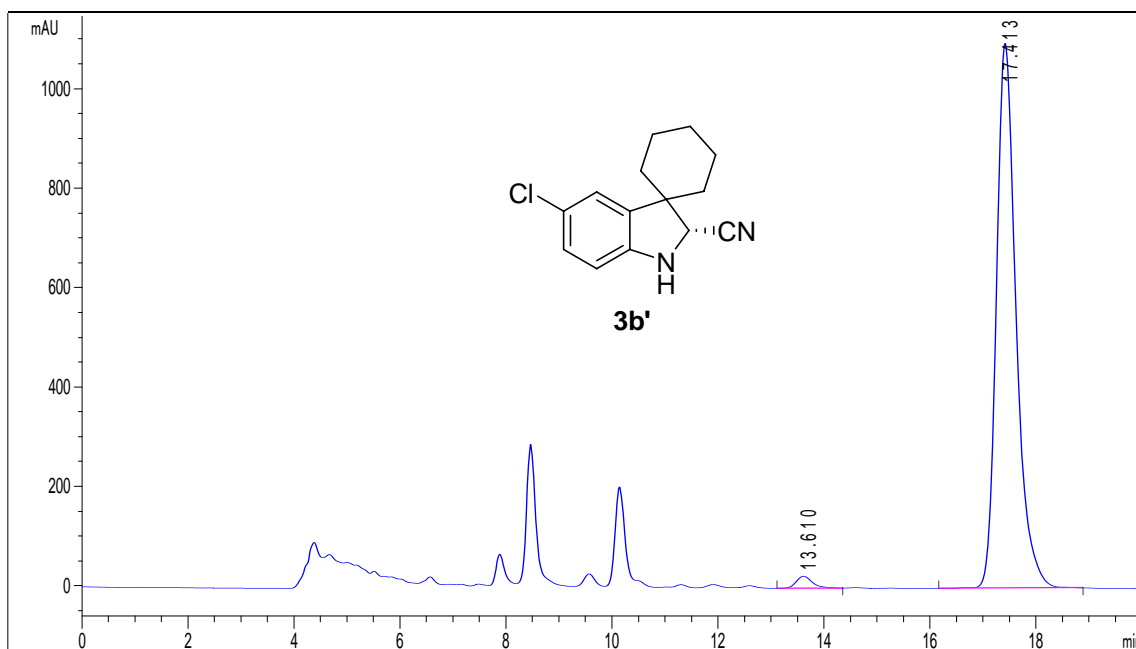

| Number | Time (min) | Area (mAU·s) | Height (mAU) | Width (min) | Symmetry factor | Area (%) |
|--------|------------|--------------|--------------|-------------|-----------------|----------|
| 1      | 13.61      | 492.4        | 25           | 0.3287      | 0.846           | 1.715    |
| 2      | 17.413     | 28225.4      | 1096.1       | 0.3922      | 0.734           | 98.285   |



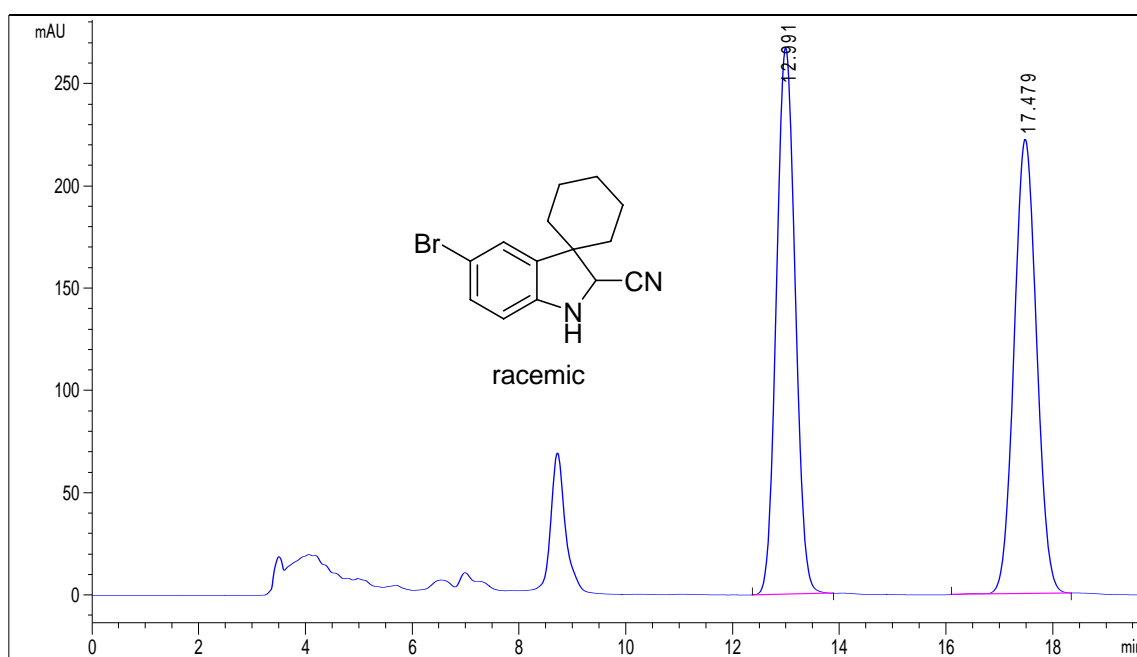

| Number | Time (min) | Area (mAU·s) | Height (mAU) | Width (min) | Symmetry factor | Area (%) |
|--------|------------|--------------|--------------|-------------|-----------------|----------|
| 1      | 12.991     | 6524.8       | 267.4        | 0.3852      | 0.917           | 50.091   |
| 2      | 17.479     | 6501.1       | 222.2        | 0.4578      | 0.935           | 49.909   |

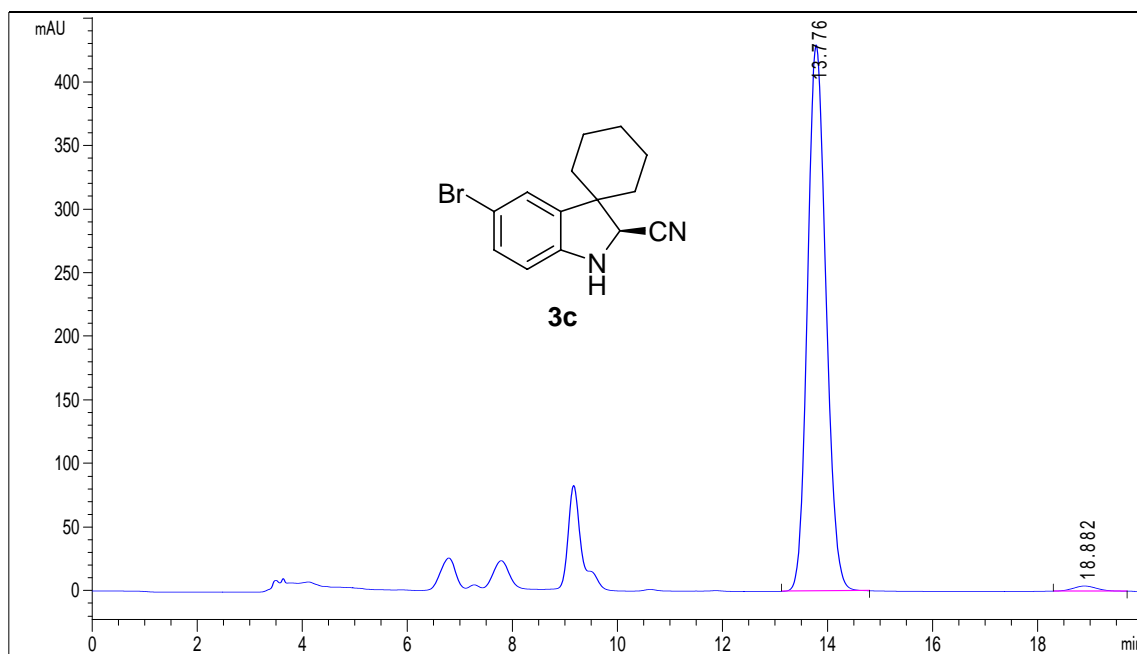

| Number | Time (min) | Area (mAU·s) | Height (mAU) | Width (min) | Symmetry factor | Area (%) |
|--------|------------|--------------|--------------|-------------|-----------------|----------|
| 1      | 13.776     | 10497.5      | 429.6        | 0.3797      | 0.83            | 98.775   |
| 2      | 18.882     | 130.2        | 4.1          | 0.4864      | 0.892           | 1.225    |

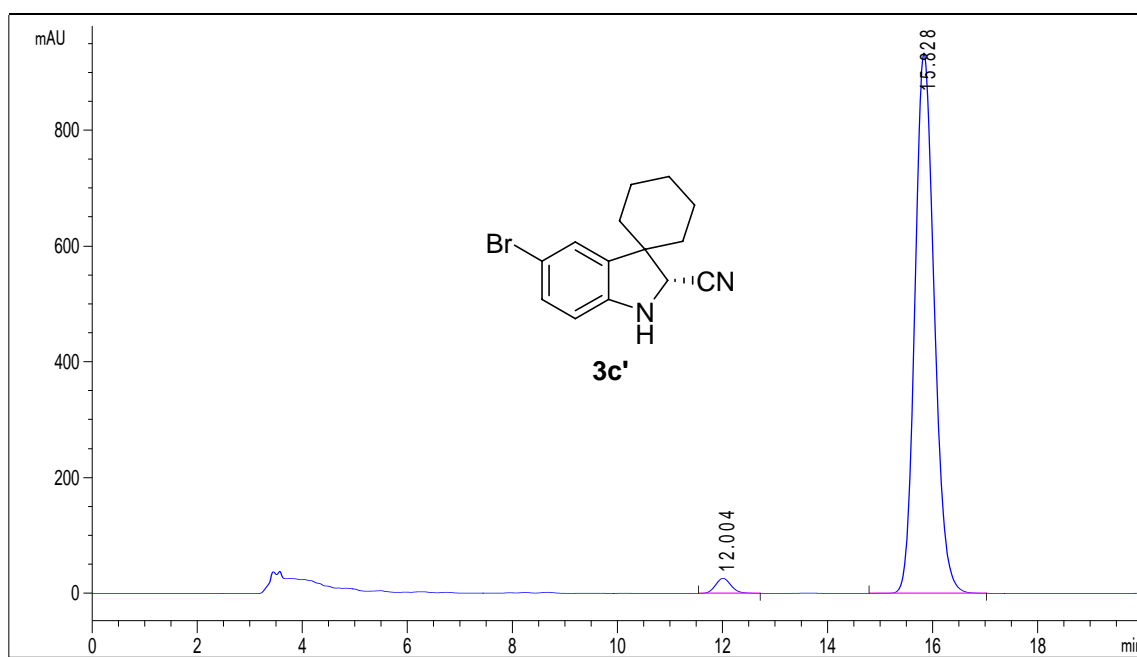

| Number | Time (min) | Area (mAU·s) | Height (mAU) | Width (min) | Symmetry factor | Area (%) |
|--------|------------|--------------|--------------|-------------|-----------------|----------|
| 1      | 12.004     | 544.4        | 26.1         | 0.3234      | 0.878           | 2.234    |
| 2      | 15.828     | 23828.7      | 933.8        | 0.3953      | 0.822           | 97.766   |

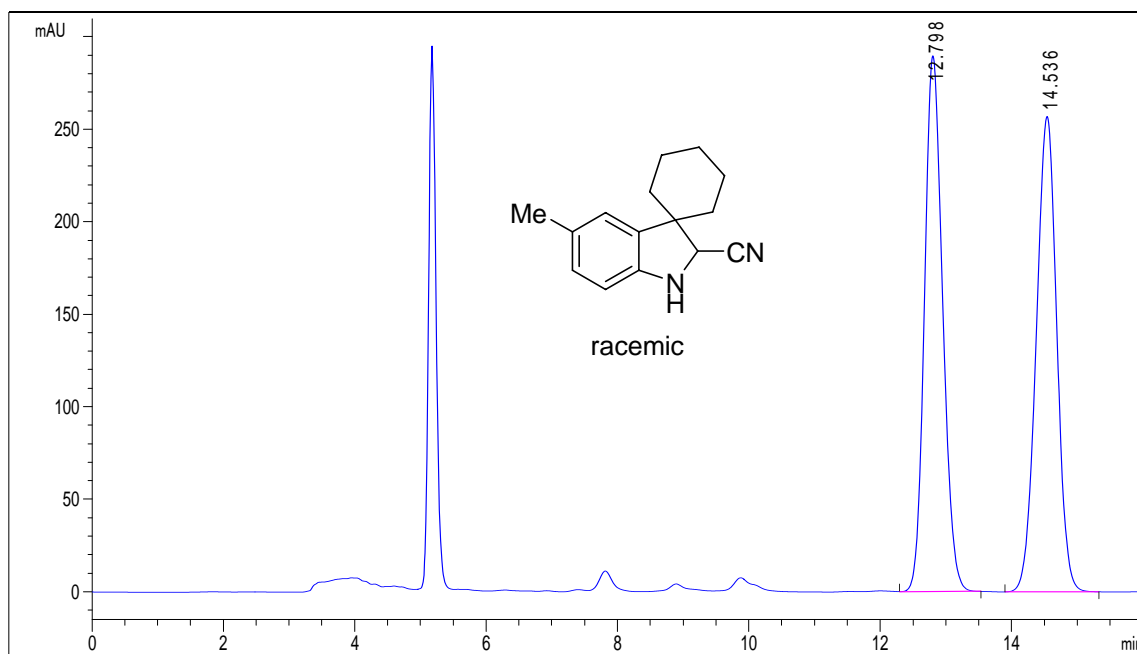

| Number | Time (min) | Area (mAU·s) | Height (mAU) | Width (min) | Symmetry factor | Area (%) |
|--------|------------|--------------|--------------|-------------|-----------------|----------|
| 1      | 12.798     | 5562.9       | 289.7        | 0.2968      | 0.808           | 49.956   |
| 2      | 14.536     | 5572.8       | 257          | 0.3374      | 1.057           | 50.044   |

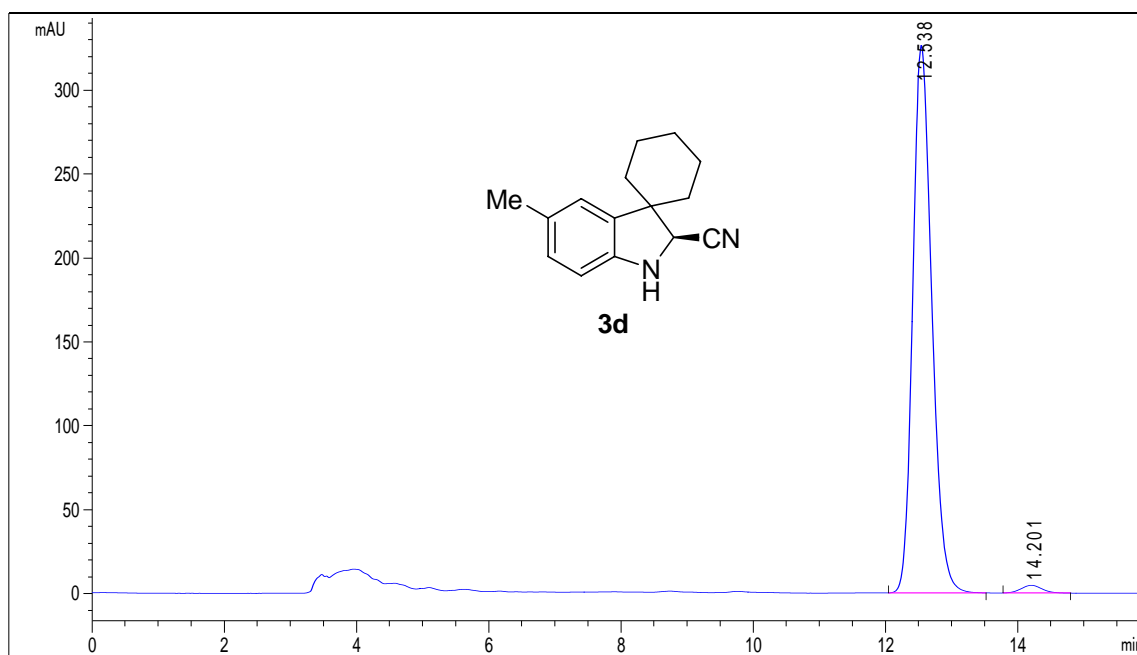

| Number | Time (min) | Area (mAU·s) | Height (mAU) | Width (min) | Symmetry factor | Area (%) |
|--------|------------|--------------|--------------|-------------|-----------------|----------|
| 1      | 12.538     | 6533.2       | 326.3        | 0.3093      | 0.758           | 98.457   |
| 2      | 14.201     | 102.4        | 4.6          | 0.3429      | 0.907           | 1.543    |

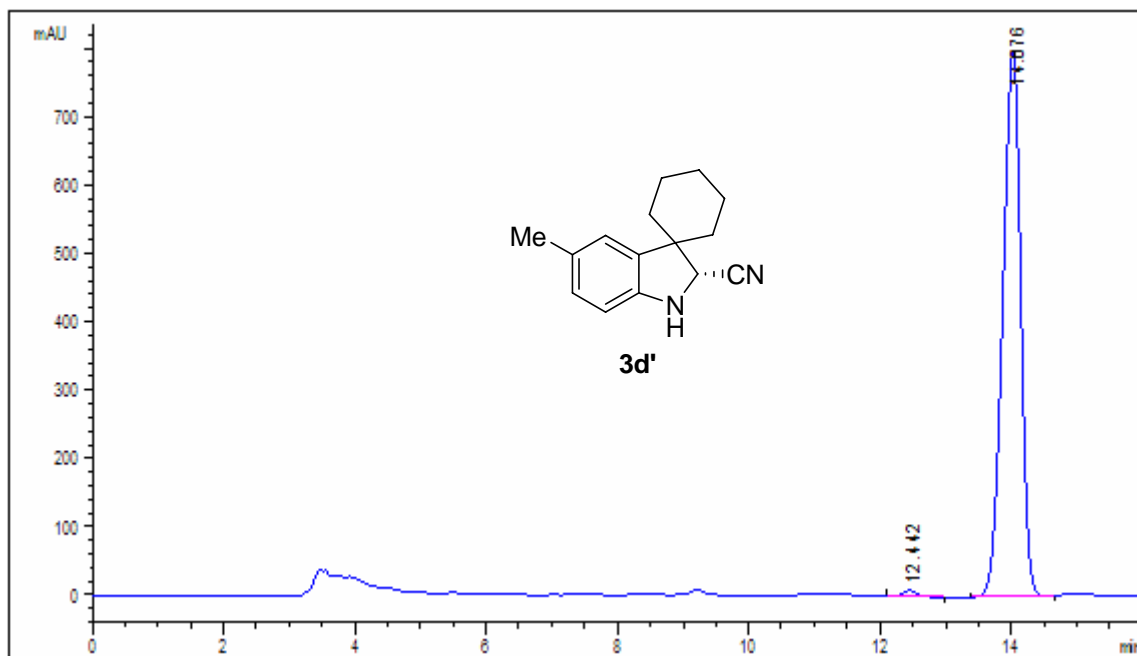

| Number | Time (min) | Area (mAU·s) | Height (mAU) | Width (min) | Symmetry factor | Area (%) |
|--------|------------|--------------|--------------|-------------|-----------------|----------|
| 1      | 12.442     | 163.5        | 9.7          | 0.2586      | 0.957           | 1.064    |
| 2      | 14.076     | 15195.9      | 797.5        | 0.2966      | 1.271           | 98.936   |

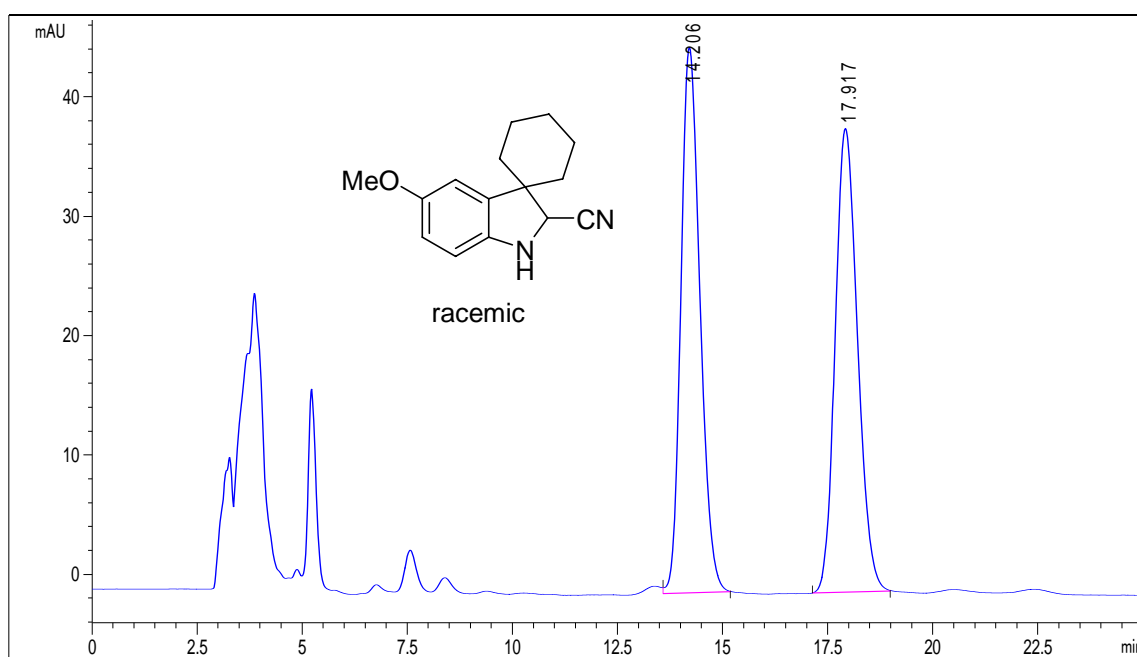

| Number | Time (min) | Area (mAU·s) | Height (mAU) | Width (min) | Symmetry factor | Area (%) |
|--------|------------|--------------|--------------|-------------|-----------------|----------|
| 1      | 14.206     | 1442.7       | 45.7         | 0.4875      | 0.758           | 50.103   |
| 2      | 17.917     | 1436.8       | 38.9         | 0.574       | 0.8             | 49.897   |

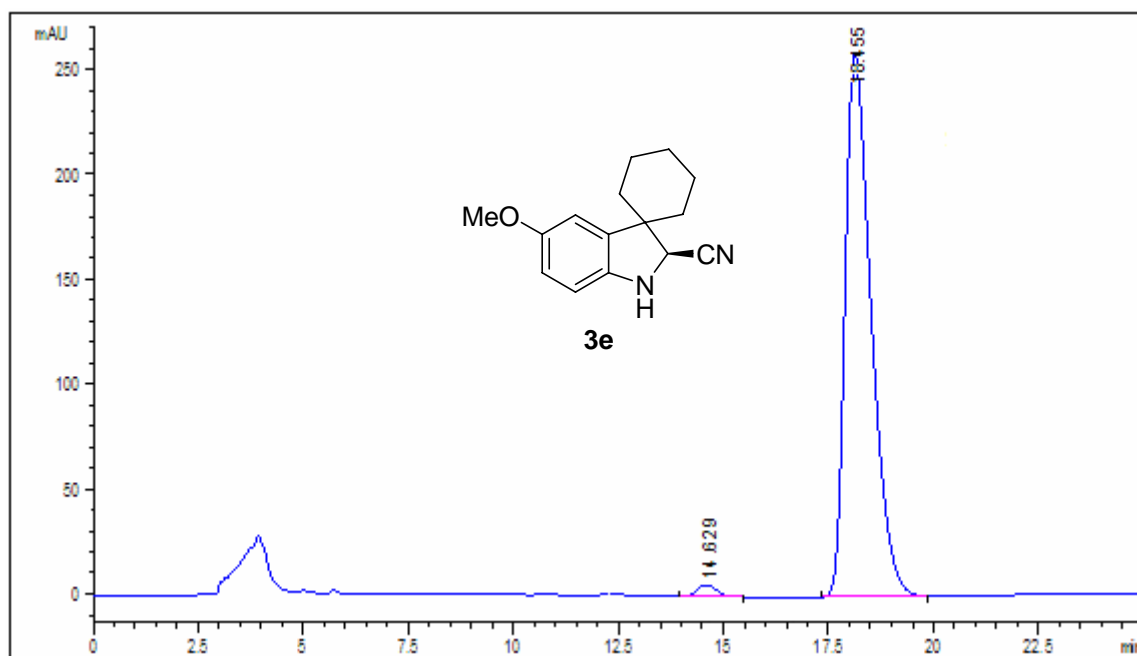

| Number | Time (min) | Area (mAU·s) | Height (mAU) | Width (min) | Symmetry factor | Area (%) |
|--------|------------|--------------|--------------|-------------|-----------------|----------|
| 1      | 14.629     | 185.4        | 5.6          | 0.5175      | 0.858           | 1.638    |
| 2      | 18.455     | 11136.2      | 259.7        | 0.6518      | 0.555           | 98.362   |

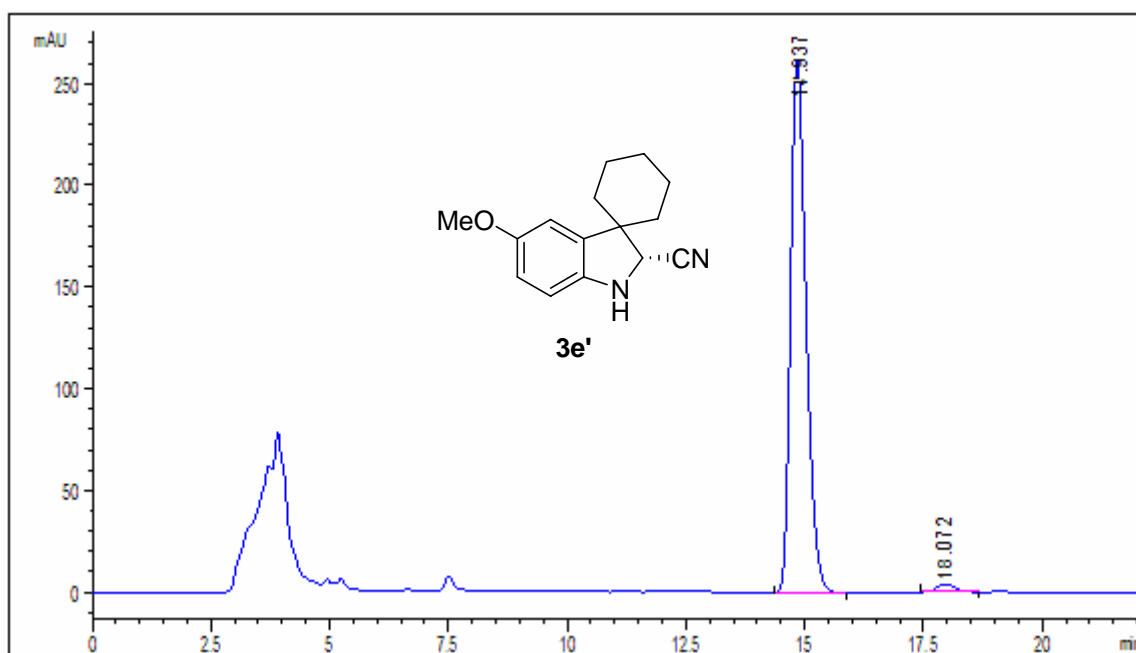

| Number | Time (min) | Area (mAU·s) | Height (mAU) | Width (min) | Symmetry factor | Area (%) |
|--------|------------|--------------|--------------|-------------|-----------------|----------|
| 1      | 14.937     | 5974.5       | 262.4        | 0.3501      | 0.673           | 98.233   |
| 2      | 18.072     | 107.5        | 4            | 0.4189      | 0.887           | 1.767    |

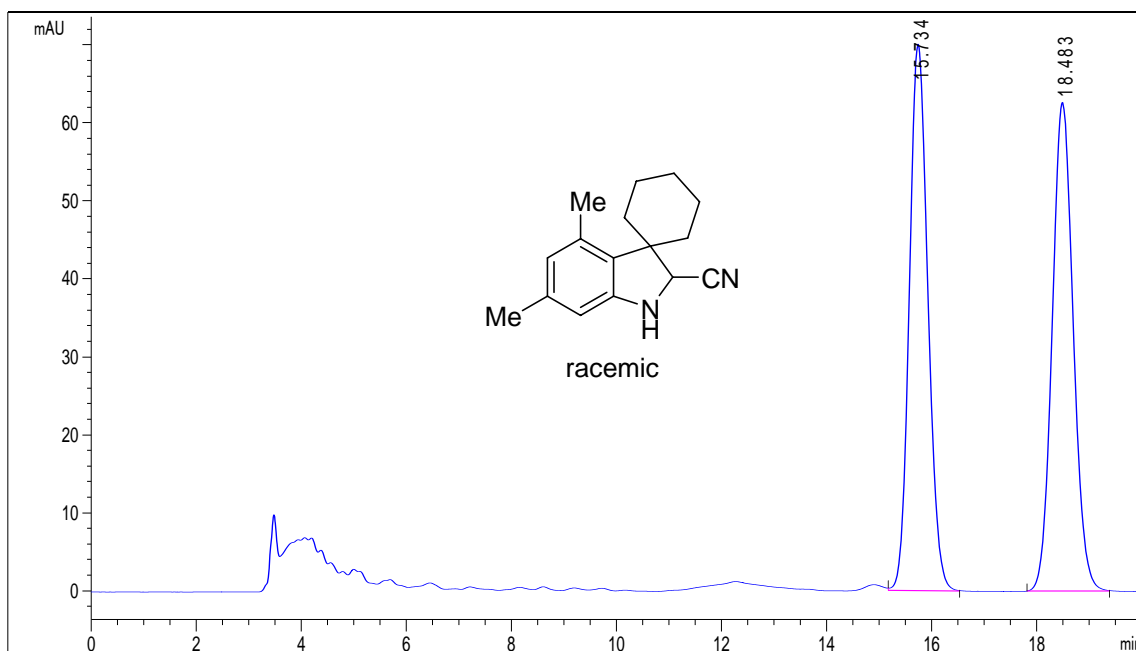

| Number | Time (min) | Area (mAU·s) | Height (mAU) | Width (min) | Symmetry factor | Area (%) |
|--------|------------|--------------|--------------|-------------|-----------------|----------|
| 1      | 15.734     | 1719.8       | 70.1         | 0.3808      | 0.845           | 49.702   |
| 2      | 18.483     | 1740.4       | 62.7         | 0.4302      | 0.908           | 50.298   |

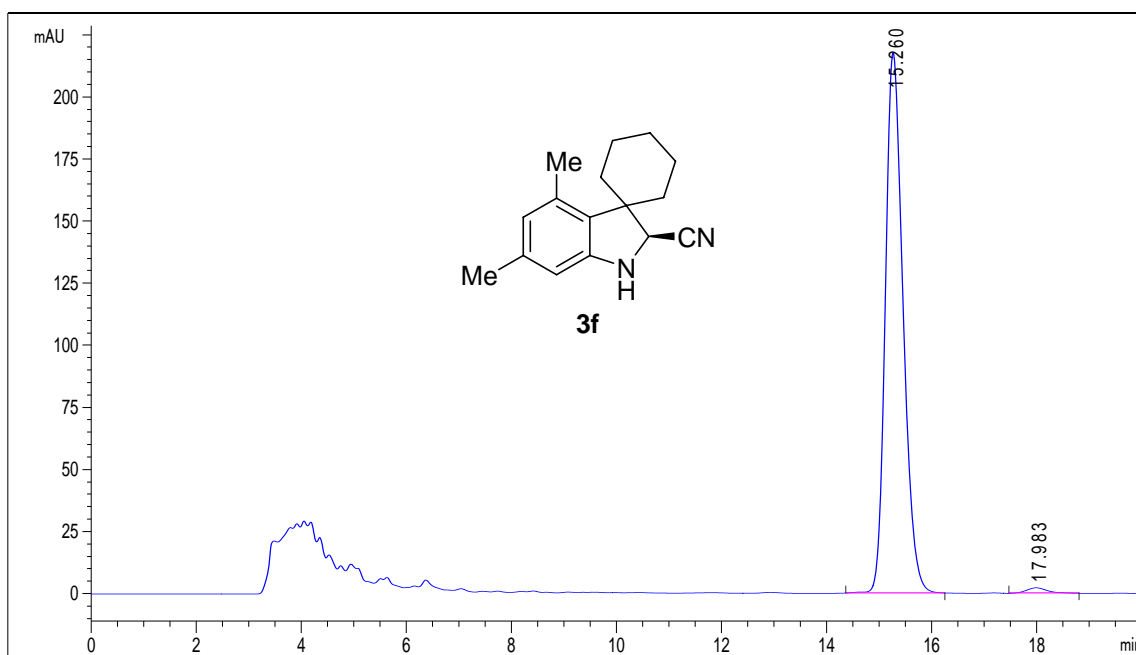

| Number | Time (min) | Area (mAU·s) | Height (mAU) | Width (min) | Symmetry factor | Area (%) |
|--------|------------|--------------|--------------|-------------|-----------------|----------|
| 1      | 15.26      | 5081.7       | 217.6        | 0.3598      | 0.734           | 98.795   |
| 2      | 17.983     | 62           | 2.2          | 0.4259      | 0.784           | 1.205    |

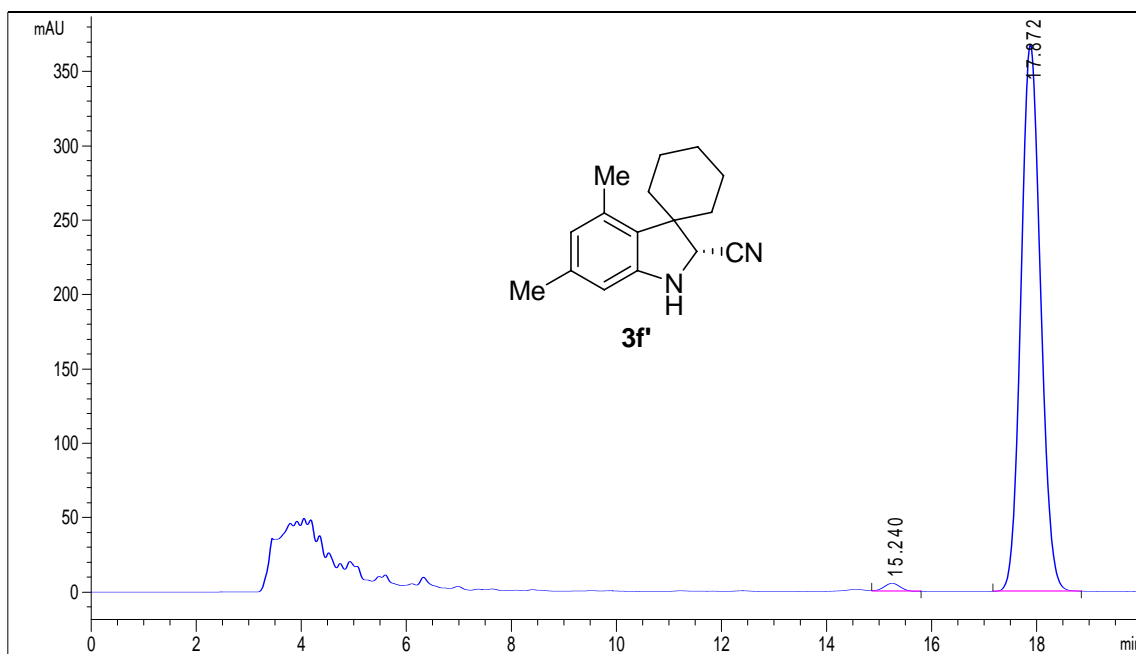

| Number | Time (min) | Area (mAU·s) | Height (mAU) | Width (min) | Symmetry factor | Area (%) |
|--------|------------|--------------|--------------|-------------|-----------------|----------|
| 1      | 15.24      | 124.4        | 5.5          | 0.3455      | 0.982           | 1.284    |
| 2      | 17.872     | 9562.8       | 368.1        | 0.405       | 0.877           | 98.716   |

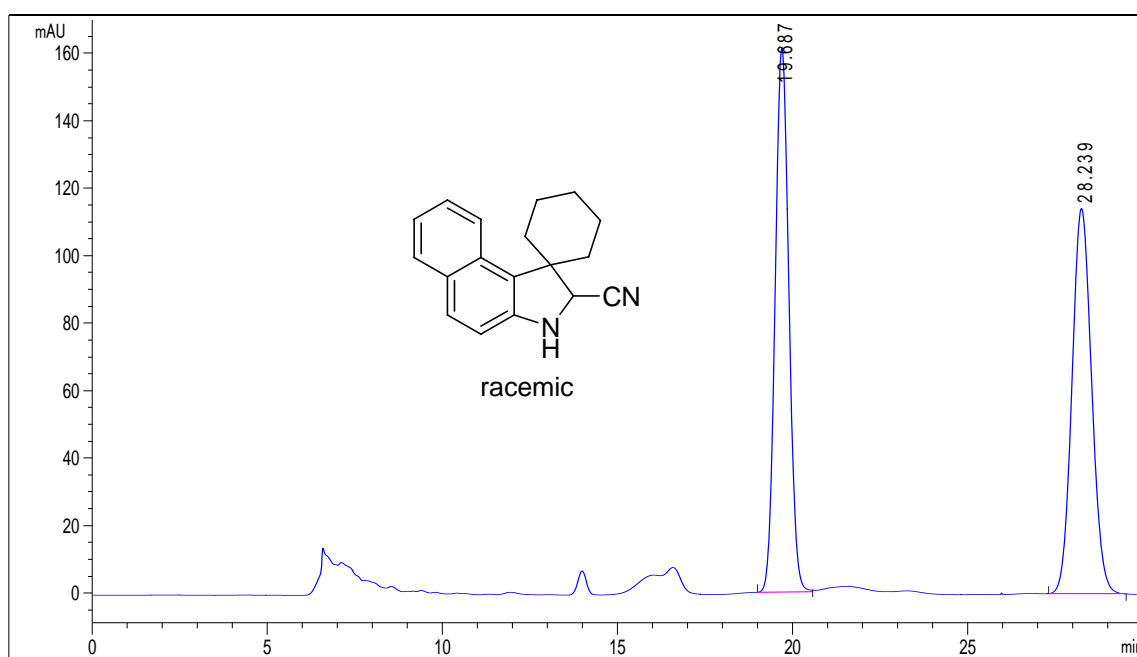

| Number | Time (min) | Area (mAU·s) | Height (mAU) | Width (min) | Symmetry factor | Area (%) |
|--------|------------|--------------|--------------|-------------|-----------------|----------|
| 1      | 19.687     | 4391.7       | 161.5        | 0.425       | 0.917           | 49.695   |
| 2      | 28.239     | 4445.6       | 114.3        | 0.6053      | 0.894           | 50.305   |

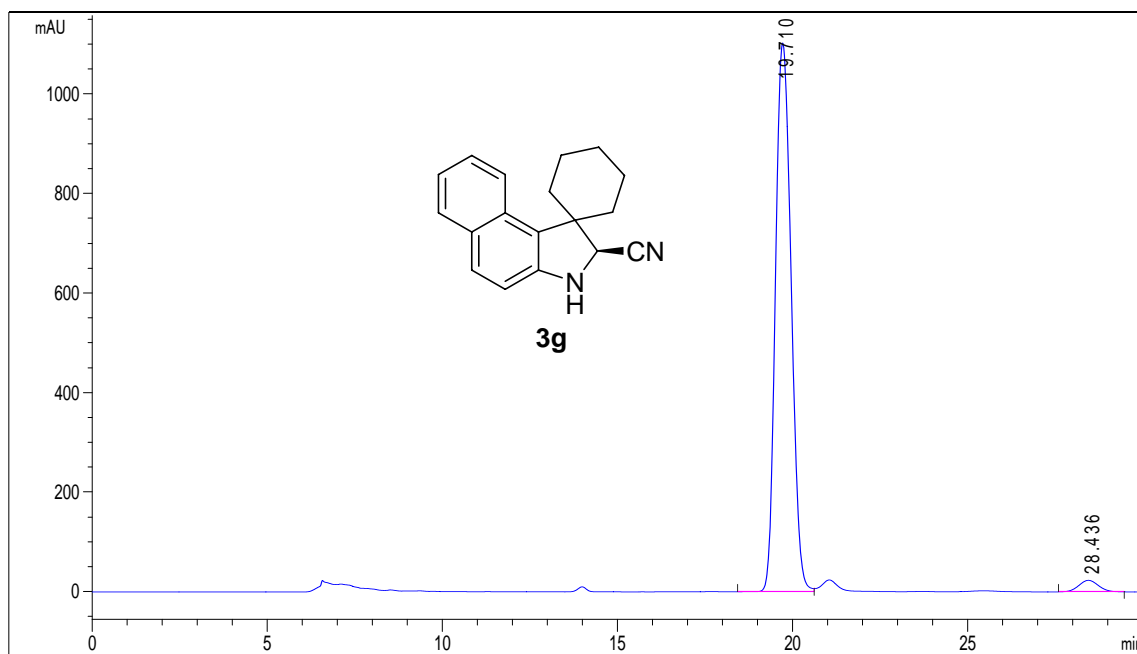

| Number | Time (min) | Area (mAU·s) | Height (mAU) | Width (min) | Symmetry factor | Area (%) |
|--------|------------|--------------|--------------|-------------|-----------------|----------|
| 1      | 19.71      | 34101.7      | 1102.5       | 0.4977      | 0.808           | 97.408   |
| 2      | 28.436     | 907.3        | 23.3         | 0.6082      | 0.929           | 2.592    |

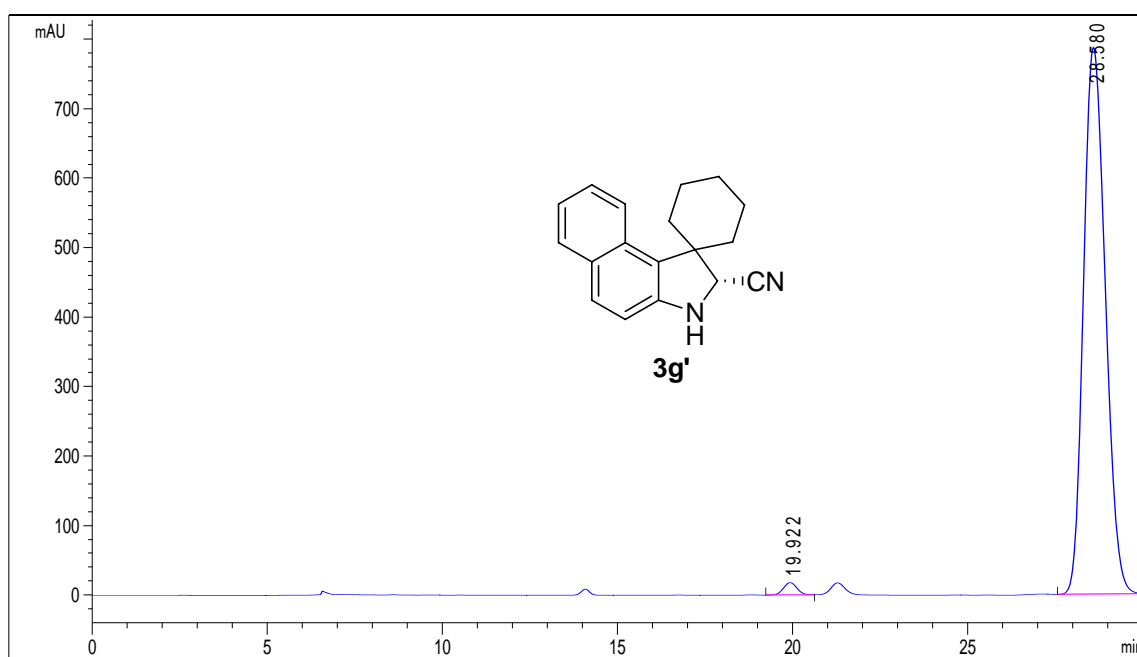

| Number | Time (min) | Area (mAU·s) | Height (mAU) | Width (min) | Symmetry factor | Area (%) |
|--------|------------|--------------|--------------|-------------|-----------------|----------|
| 1      | 19.922     | 490.5        | 17.9         | 0.4237      | 0.919           | 1.422    |
| 2      | 28.58      | 34008.6      | 787.4        | 0.6859      | 0.79            | 98.578   |

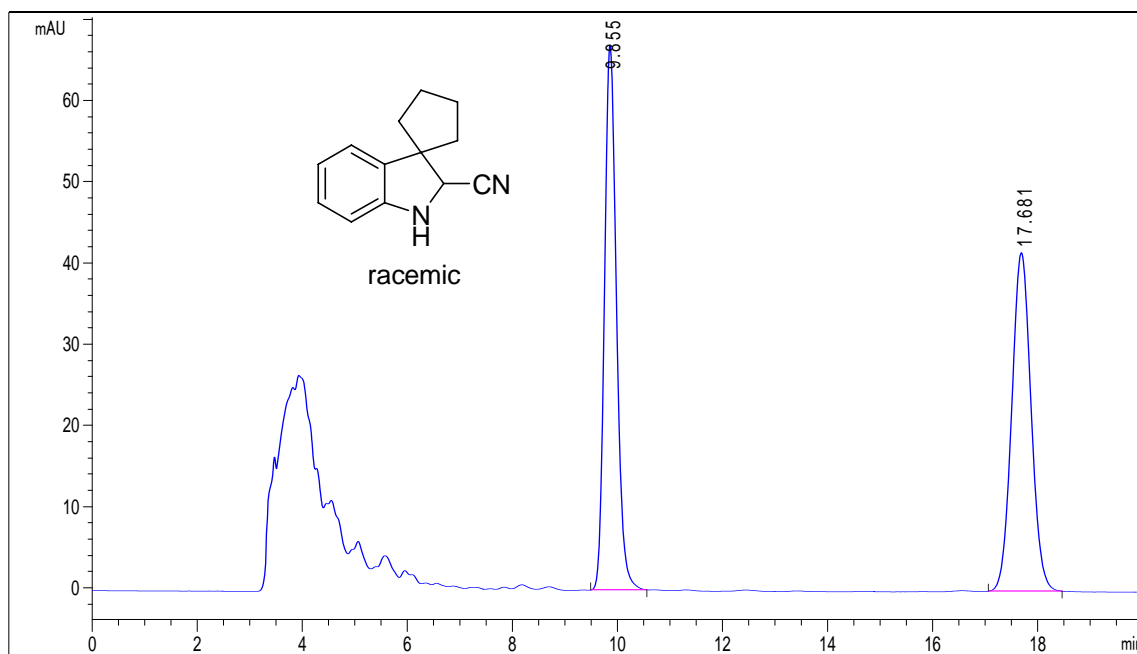

| Number | Time (min) | Area (mAU·s) | Height (mAU) | Width (min) | Symmetry factor | Area (%) |
|--------|------------|--------------|--------------|-------------|-----------------|----------|
| 1      | 9.855      | 1060.4       | 67.1         | 0.2455      | 0.813           | 49.925   |
| 2      | 17.681     | 1063.6       | 41.7         | 0.395       | 0.945           | 50.075   |



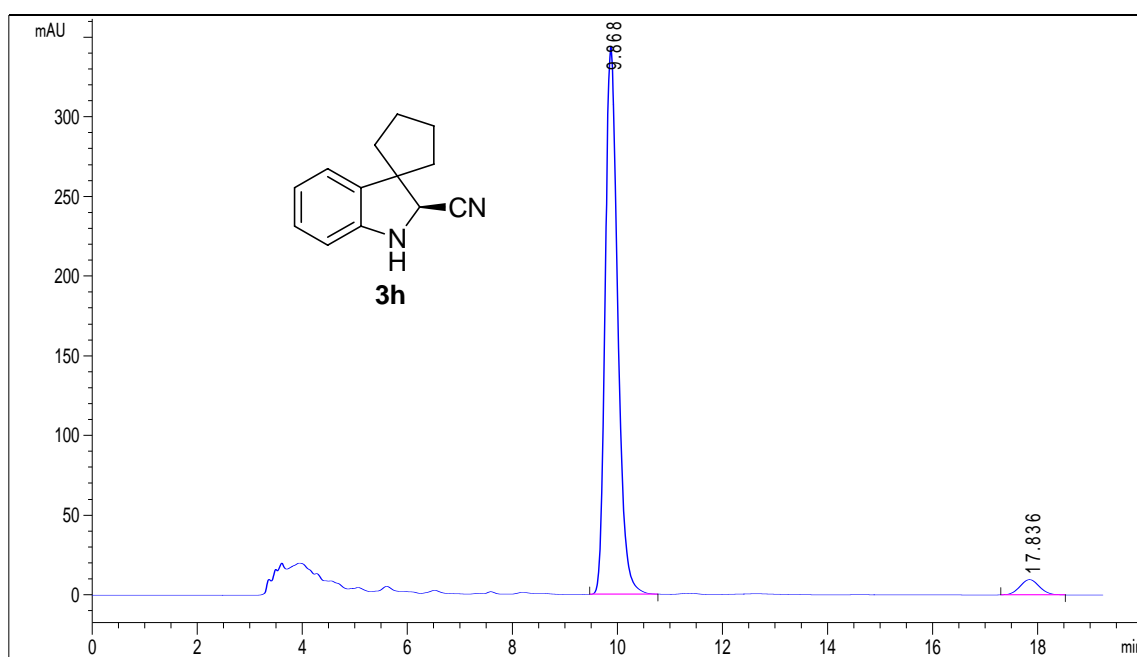

| Number | Time (min) | Area (mAU·s) | Height (mAU) | Width (min) | Symmetry factor | Area (%) |
|--------|------------|--------------|--------------|-------------|-----------------|----------|
| 1      | 9.868      | 5715.5       | 344          | 0.2579      | 0.734           | 95.799   |
| 2      | 17.836     | 250.7        | 9.7          | 0.4002      | 0.931           | 4.201    |

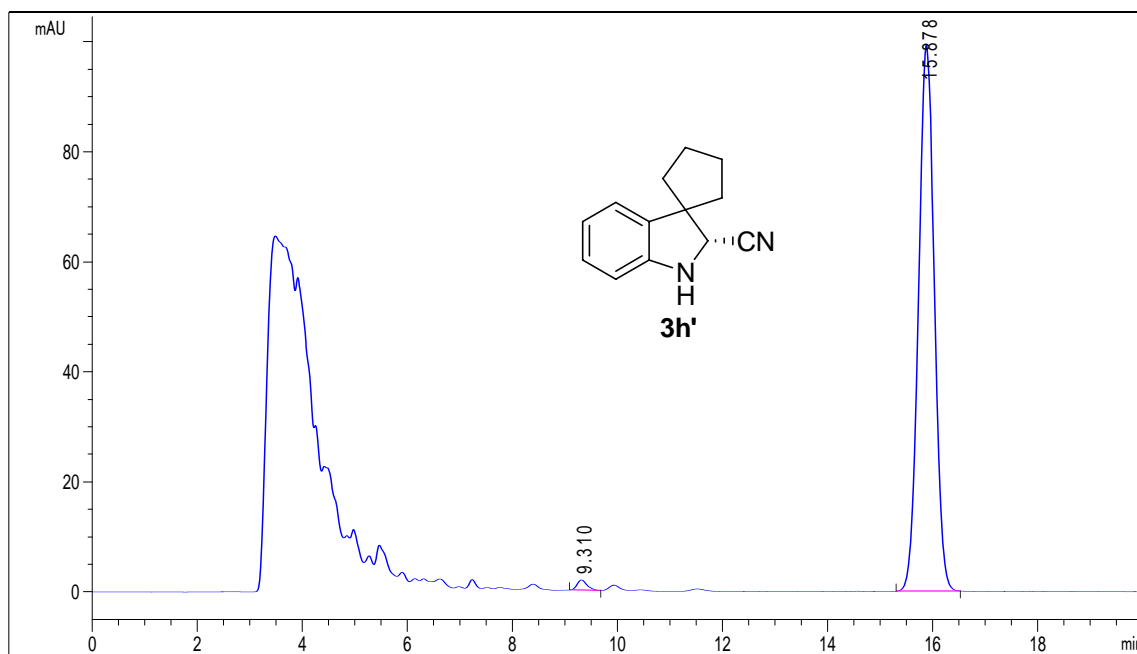

| Number | Time (min) | Area (mAU·s) | Height (mAU) | Width (min) | Symmetry factor | Area (%) |
|--------|------------|--------------|--------------|-------------|-----------------|----------|
| 1      | 9.31       | 25.4         | 1.9          | 0.2007      | 0.748           | 1.207    |
| 2      | 15.878     | 2077.1       | 99.5         | 0.3251      | 0.99            | 98.793   |

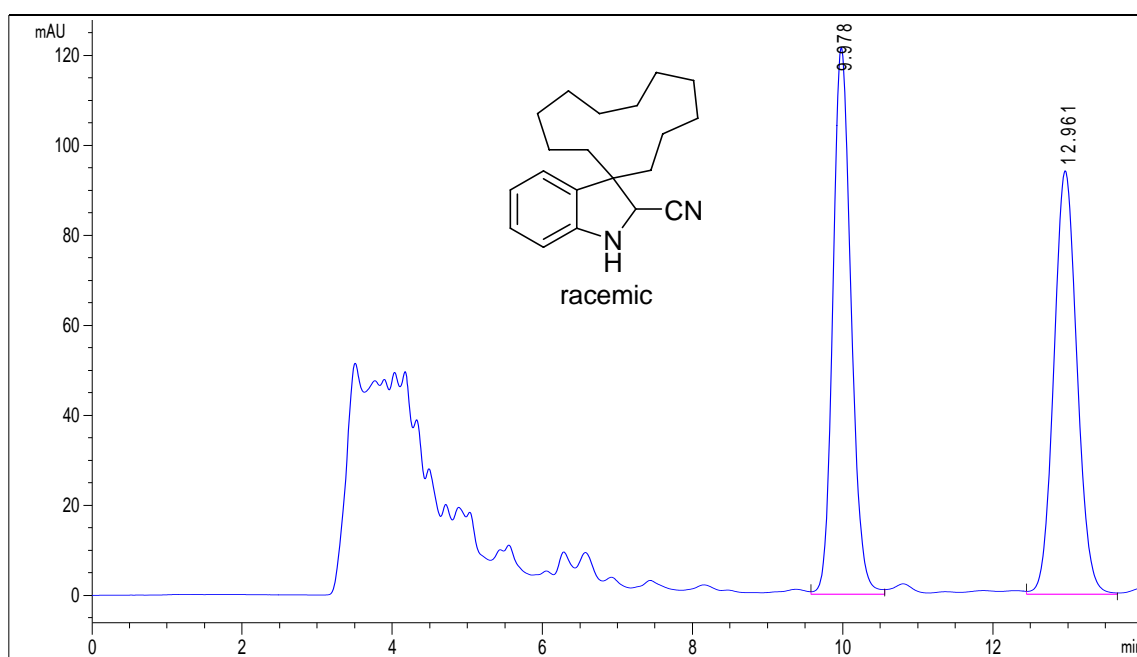

| Number | Time (min) | Area (mAU·s) | Height (mAU) | Width (min) | Symmetry factor | Area (%) |
|--------|------------|--------------|--------------|-------------|-----------------|----------|
| 1      | 9.978      | 2053.3       | 121.6        | 0.2611      | 0.807           | 50.525   |
| 2      | 12.961     | 2010.6       | 94.1         | 0.3322      | 0.913           | 49.475   |

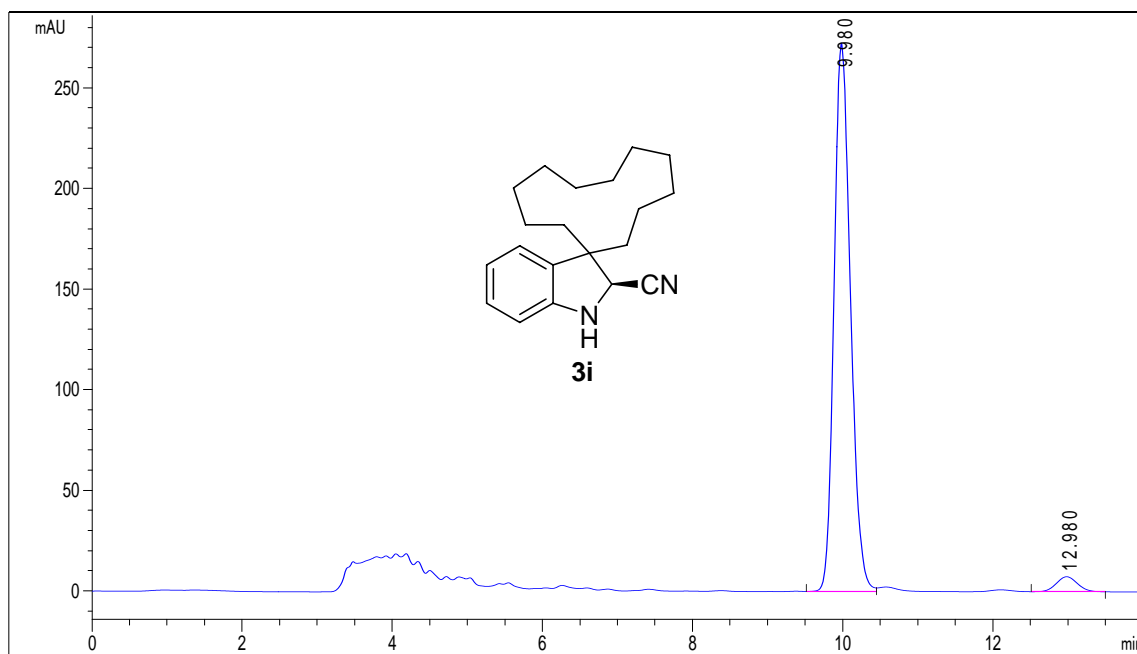

| Number | Time (min) | Area (mAU·s) | Height (mAU) | Width (min) | Symmetry factor | Area (%) |
|--------|------------|--------------|--------------|-------------|-----------------|----------|
| 1      | 9.98       | 4142.8       | 272.7        | 0.2355      | 0.775           | 96.559   |
| 2      | 12.98      | 147.6        | 7.5          | 0.3065      | 0.925           | 3.441    |

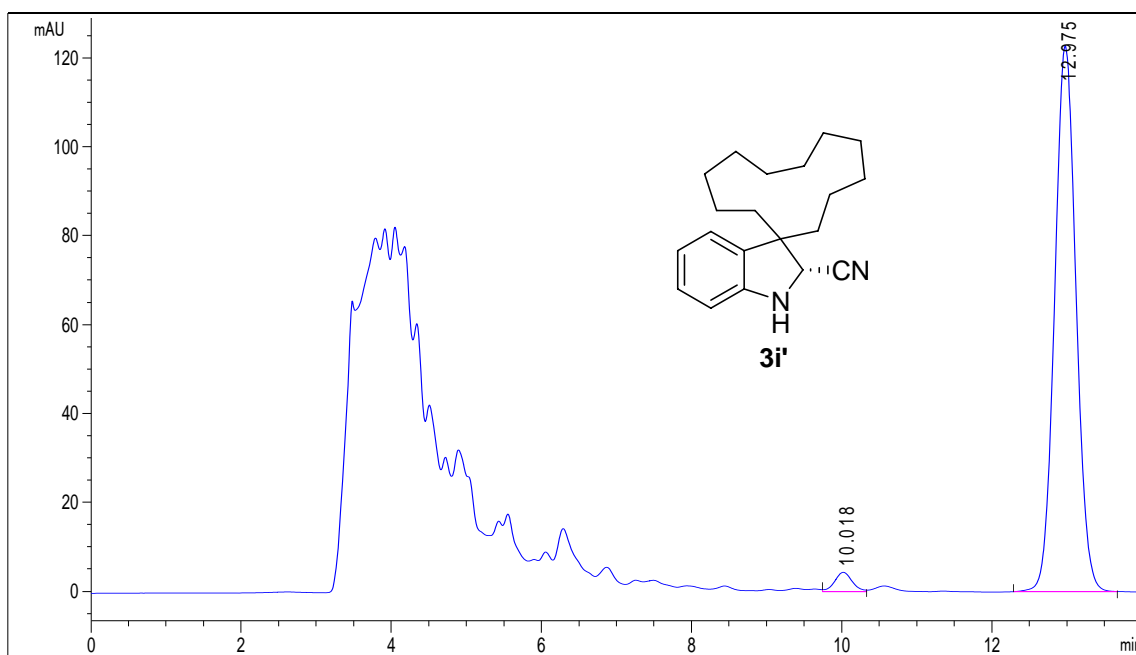

| Number | Time (min) | Area (mAU·s) | Height (mAU) | Width (min) | Symmetry factor | Area (%) |
|--------|------------|--------------|--------------|-------------|-----------------|----------|
| 1      | 10.018     | 73.5         | 4.4          | 0.2517      | 0.928           | 2.931    |
| 2      | 12.975     | 2432.6       | 123          | 0.308       | 0.946           | 97.069   |

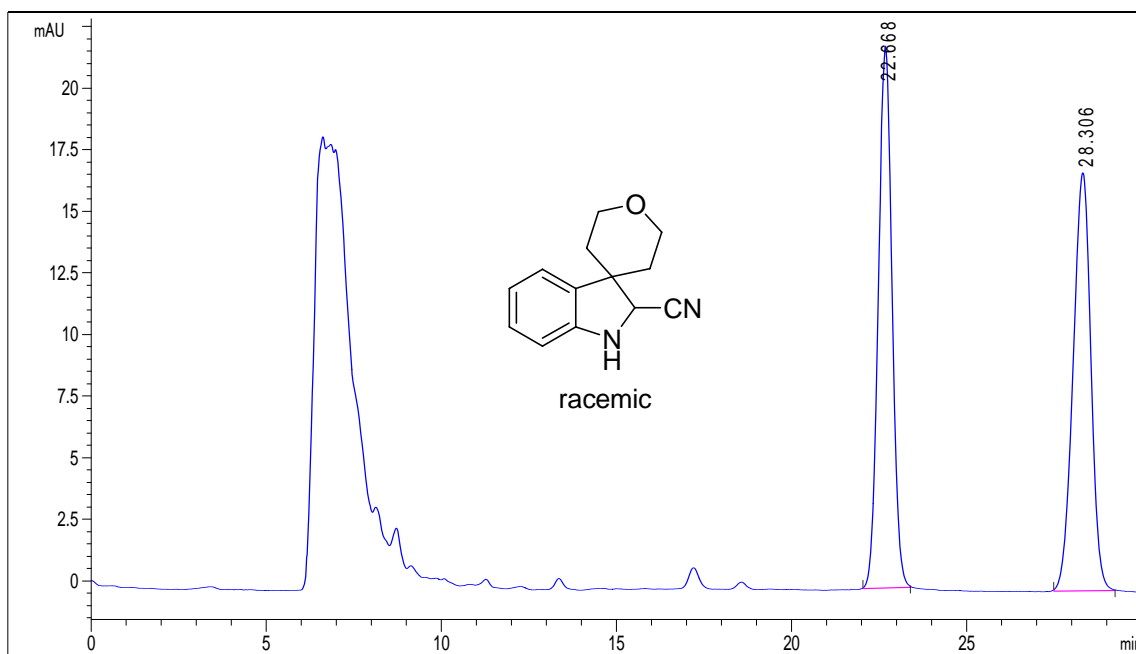

| Number | Time (min) | Area (mAU·s) | Height (mAU) | Width (min) | Symmetry factor | Area (%) |
|--------|------------|--------------|--------------|-------------|-----------------|----------|
| 1      | 22.668     | 598.4        | 22           | 0.4221      | 0.997           | 50.107   |
| 2      | 28.306     | 595.8        | 17           | 0.5437      | 1.153           | 49.893   |

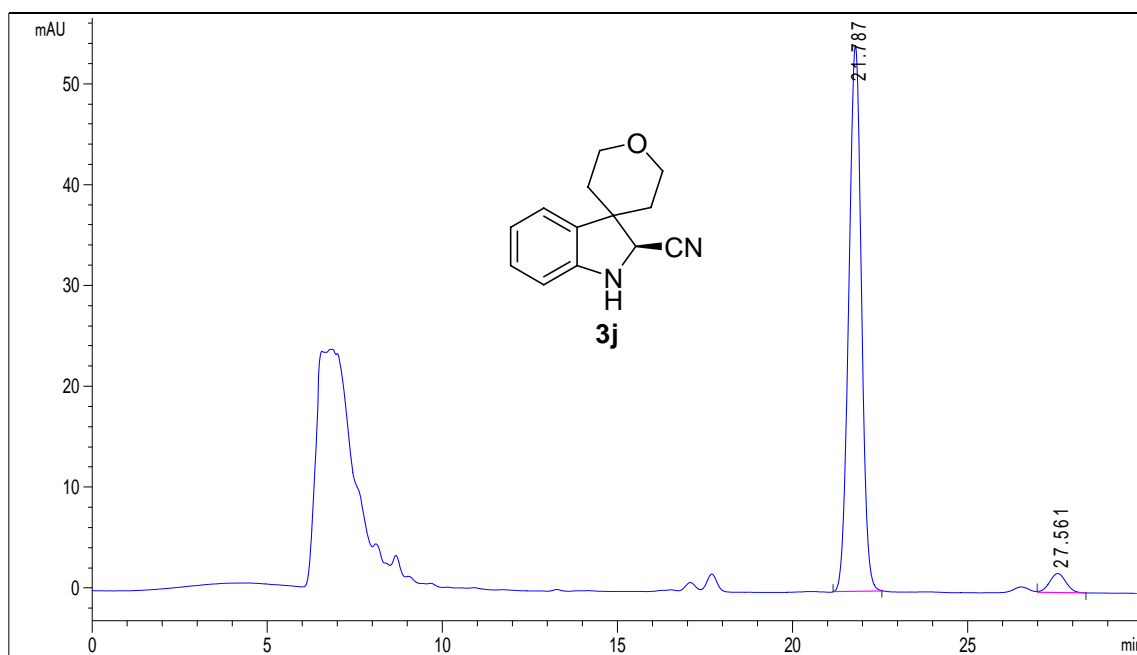

| Number | Time (min) | Area (mAU·s) | Height (mAU) | Width (min) | Symmetry factor | Area (%) |
|--------|------------|--------------|--------------|-------------|-----------------|----------|
| 1      | 21.787     | 1357.1       | 54.2         | 0.3913      | 1.063           | 95.622   |
| 2      | 27.561     | 62.1         | 1.9          | 0.4975      | 0.962           | 4.378    |

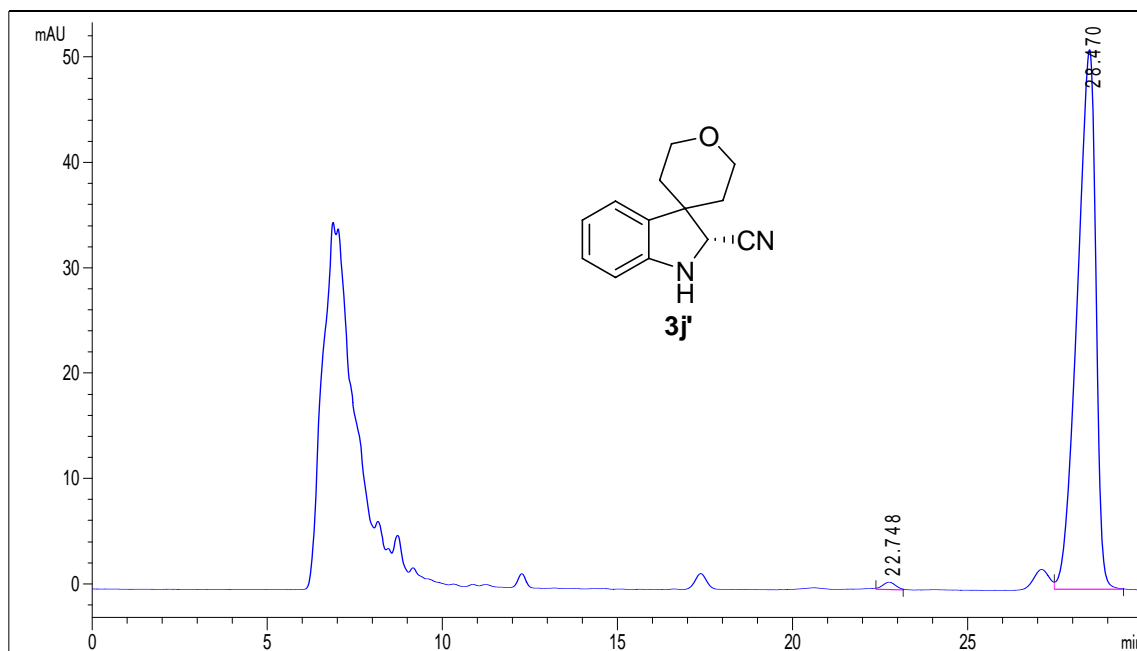

| Number | Time (min) | Area (mAU·s) | Height (mAU) | Width (min) | Symmetry factor | Area (%) |
|--------|------------|--------------|--------------|-------------|-----------------|----------|
| 1      | 22.748     | 18.6         | 7.2E-1       | 0.4335      | 0.929           | 0.980    |
| 2      | 28.47      | 1884.9       | 51.2         | 0.5617      | 1.882           | 99.020   |

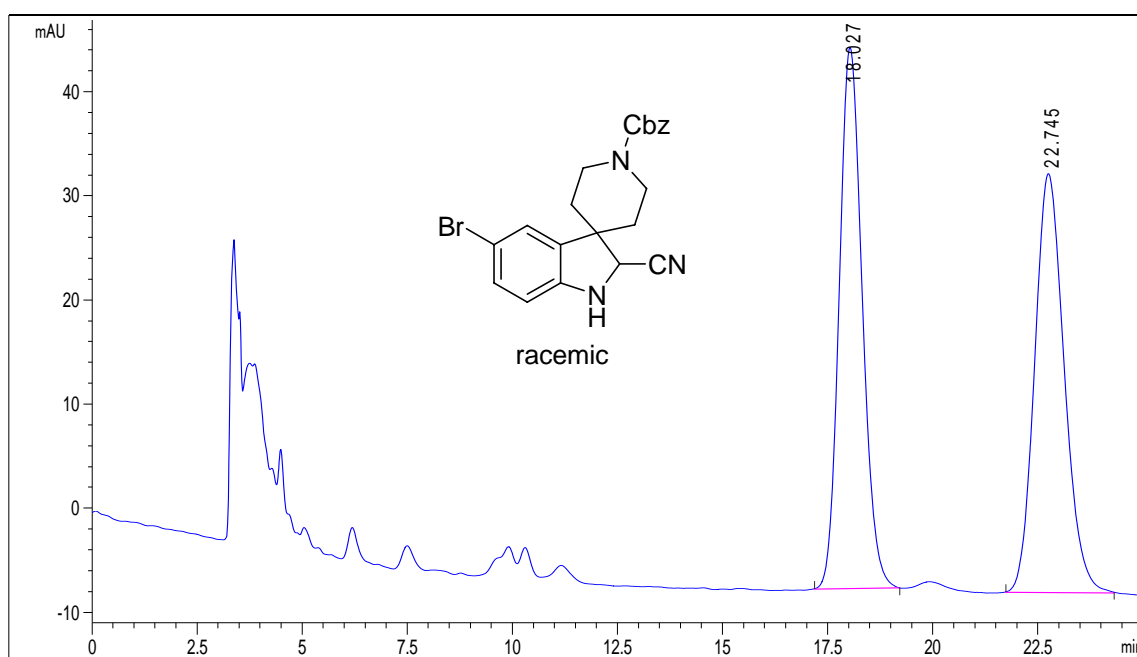

| Number | Time (min) | Area (mAU·s) | Height (mAU) | Width (min) | Symmetry factor | Area (%) |
|--------|------------|--------------|--------------|-------------|-----------------|----------|
| 1      | 18.027     | 1978.7       | 52           | 0.5895      | 0.837           | 50.132   |
| 2      | 22.745     | 1968.3       | 40.2         | 0.7554      | 0.826           | 49.868   |

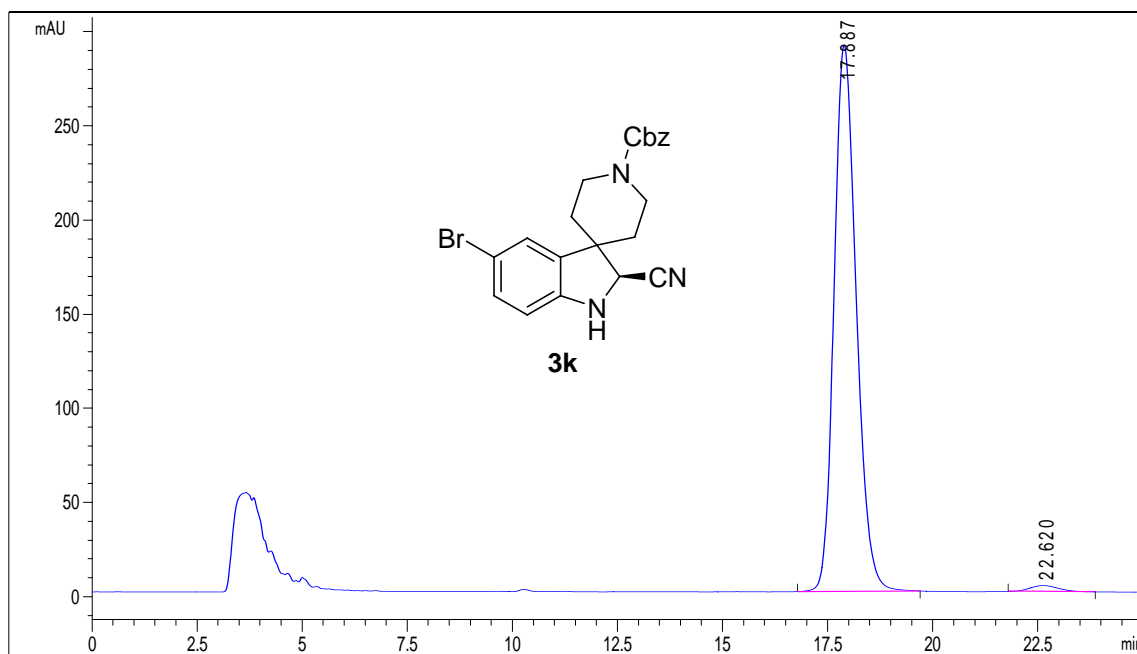

| Number | Time (min) | Area (mAU·s) | Height (mAU) | Width (min) | Symmetry factor | Area (%) |
|--------|------------|--------------|--------------|-------------|-----------------|----------|
| 1      | 17.887     | 10641.1      | 290.3        | 0.5674      | 0.784           | 98.543   |
| 2      | 22.62      | 157.4        | 3.3          | 0.6665      | 0.831           | 1.457    |

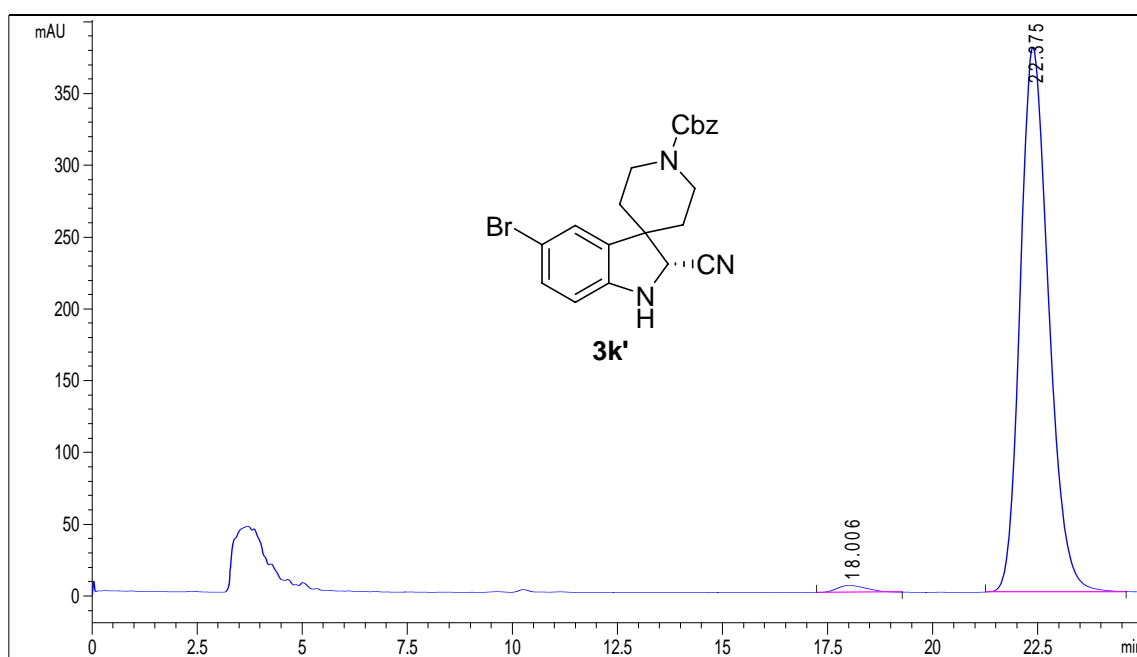

| Number | Time (min) | Area (mAU·s) | Height (mAU) | Width (min) | Symmetry factor | Area (%) |
|--------|------------|--------------|--------------|-------------|-----------------|----------|
| 1      | 18.006     | 240.8        | 4.9          | 0.7233      | 0.657           | 1.333    |
| 2      | 22.375     | 17821        | 379.2        | 0.7274      | 0.754           | 98.667   |

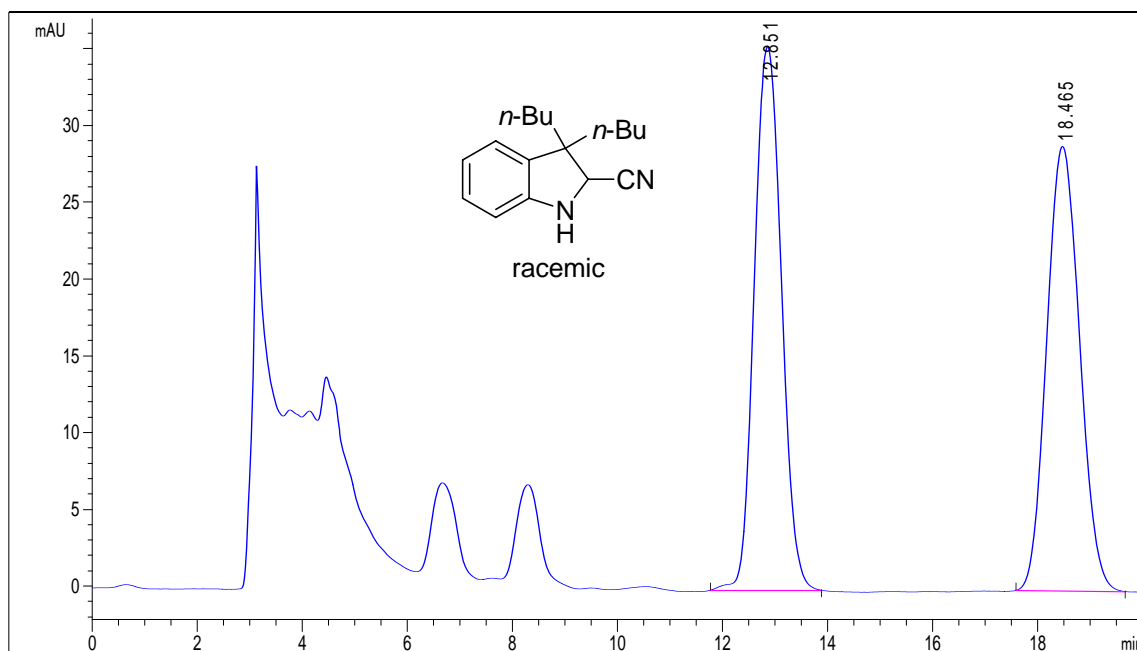

| Number | Time (min) | Area (mAU·s) | Height (mAU) | Width (min) | Symmetry factor | Area (%) |
|--------|------------|--------------|--------------|-------------|-----------------|----------|
| 1      | 12.851     | 1277.2       | 35.5         | 0.5742      | 0.909           | 50.276   |
| 2      | 18.465     | 1263.1       | 29           | 0.6877      | 0.887           | 49.724   |

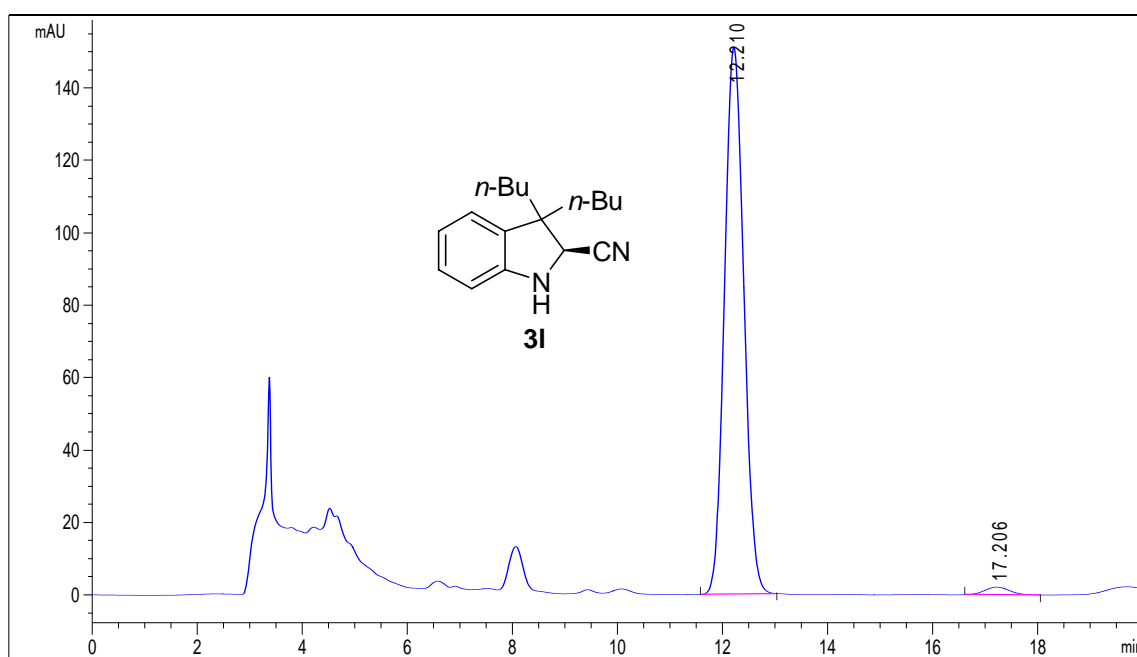

| Number | Time (min) | Area (mAU·s) | Height (mAU) | Width (min) | Symmetry factor | Area (%) |
|--------|------------|--------------|--------------|-------------|-----------------|----------|
| 1      | 12.21      | 3856.9       | 151          | 0.4013      | 0.891           | 98.204   |
| 2      | 17.206     | 70.5         | 2.1          | 0.4958      | 0.868           | 1.796    |

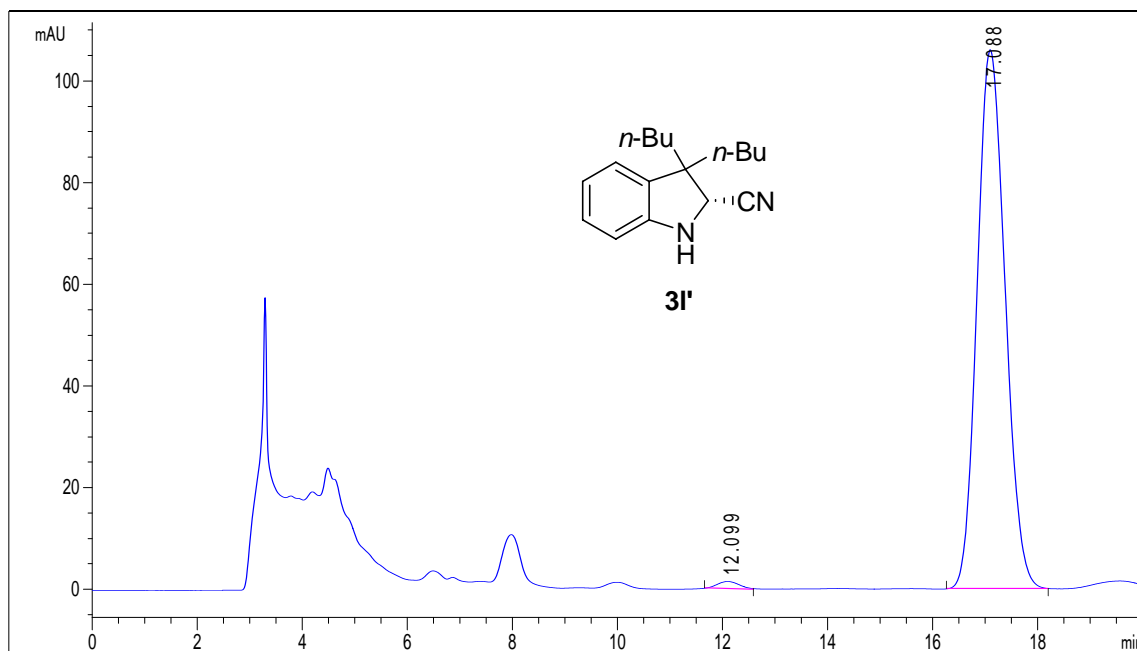

| Number | Time (min) | Area (mAU·s) | Height (mAU) | Width (min) | Symmetry factor | Area (%) |
|--------|------------|--------------|--------------|-------------|-----------------|----------|
| 1      | 12.099     | 43.3         | 1.5          | 0.4958      | 0.812           | 1.091    |
| 2      | 17.088     | 3929.7       | 106.1        | 0.5806      | 0.831           | 98.756   |

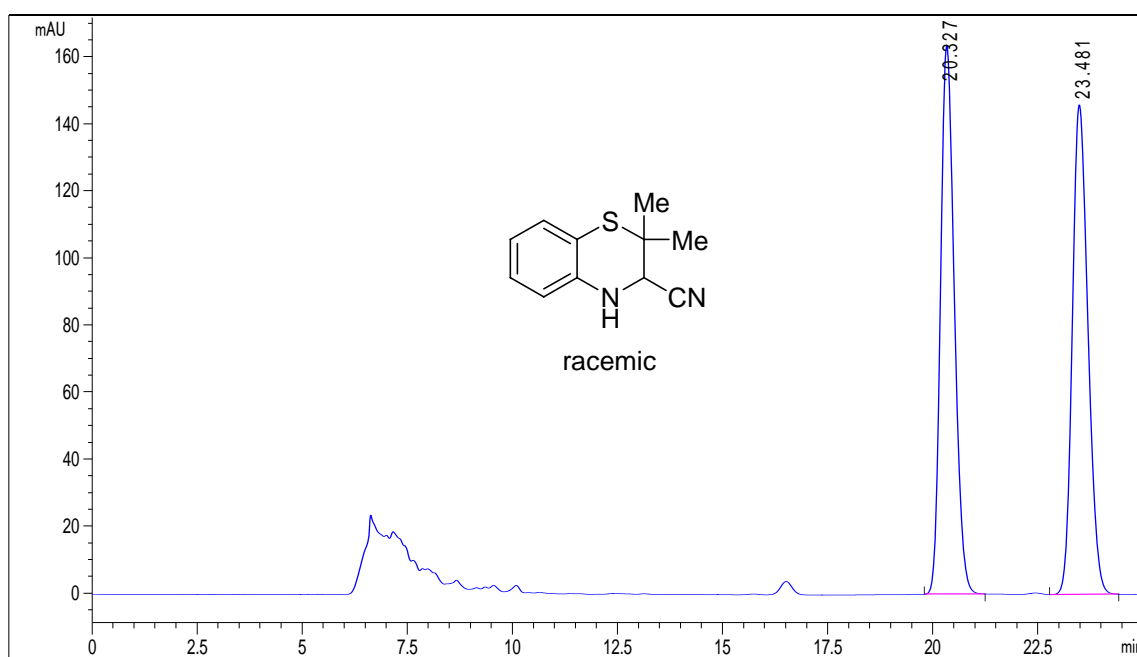

| Number | Time (min) | Area (mAU·s) | Height (mAU) | Width (min) | Symmetry factor | Area (%) |
|--------|------------|--------------|--------------|-------------|-----------------|----------|
| 1      | 20.327     | 3742.7       | 163.8        | 0.354       | 0.773           | 49.798   |
| 2      | 23.481     | 3773.1       | 146          | 0.4004      | 0.767           | 50.202   |

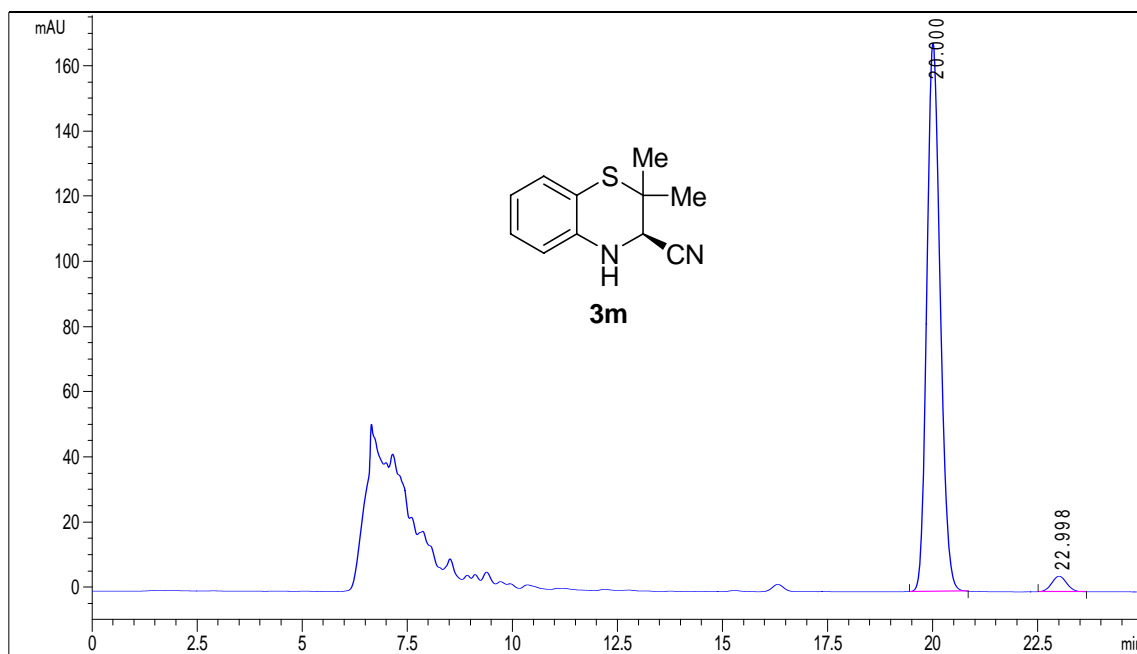

| Number | Time (min) | Area (mAU·s) | Height (mAU) | Width (min) | Symmetry factor | Area (%) |
|--------|------------|--------------|--------------|-------------|-----------------|----------|
| 1      | 20         | 3721.7       | 168.3        | 0.3439      | 0.803           | 96.879   |
| 2      | 22.998     | 119.9        | 4.8          | 0.3845      | 0.928           | 3.121    |



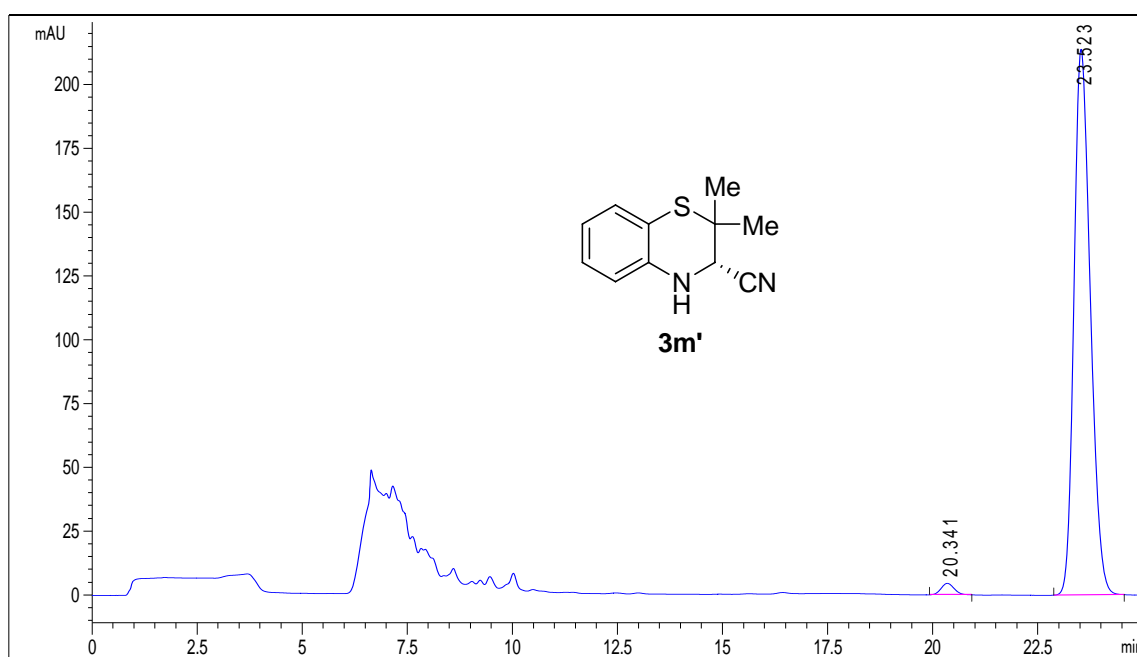

| Number | Time (min) | Area (mAU·s) | Height (mAU) | Width (min) | Symmetry factor | Area (%) |
|--------|------------|--------------|--------------|-------------|-----------------|----------|
| 1      | 20.341     | 100.1        | 4.6          | 0.3426      | 0.867           | 1.701    |
| 2      | 23.523     | 5787.4       | 214          | 0.4175      | 0.726           | 98.299   |

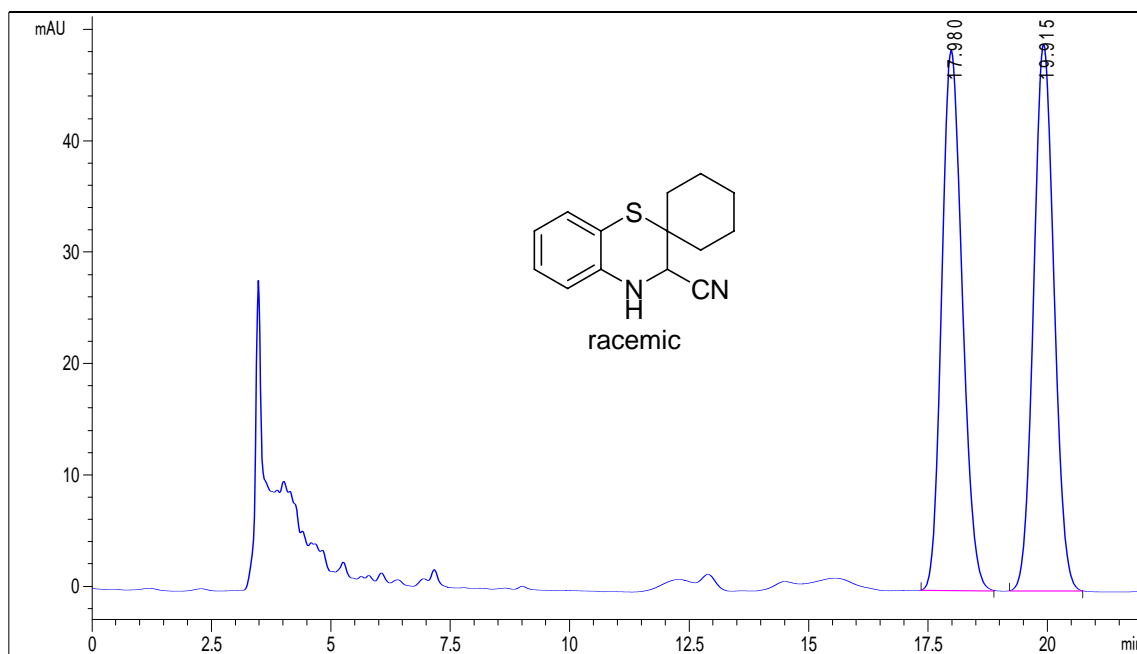

| Number | Time (min) | Area (mAU·s) | Height (mAU) | Width (min) | Symmetry factor | Area (%) |
|--------|------------|--------------|--------------|-------------|-----------------|----------|
| 1      | 17.98      | 1457         | 48.5         | 0.4682      | 0.802           | 49.934   |
| 2      | 19.915     | 1460.8       | 49.1         | 0.4634      | 0.91            | 50.066   |

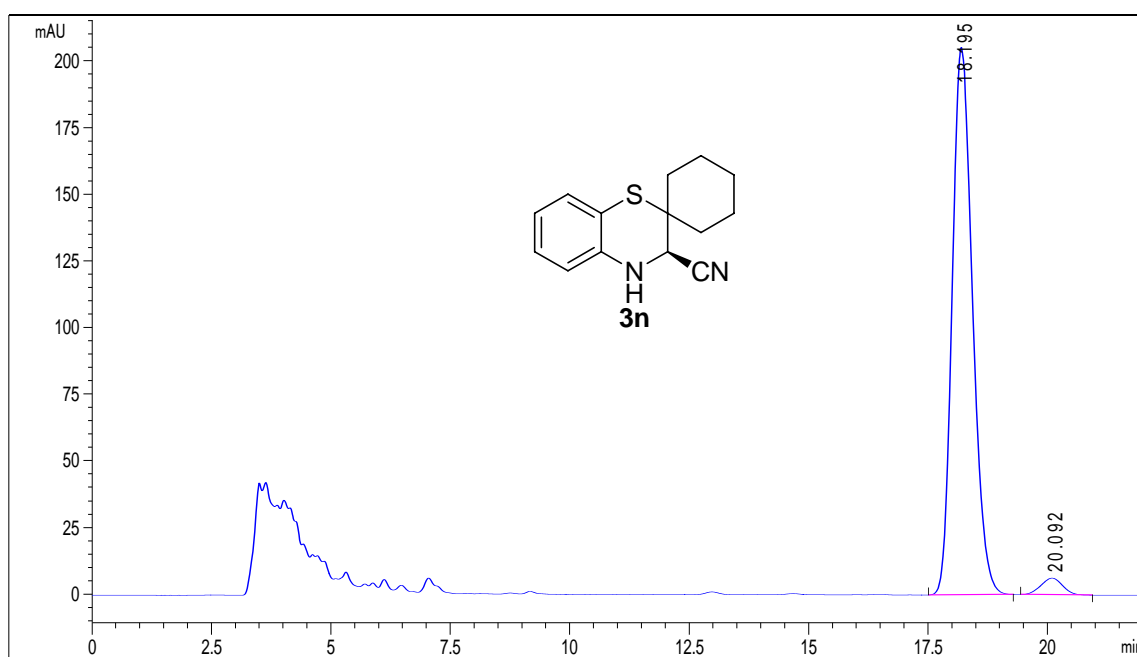

| Number | Time (min) | Area (mAU·s) | Height (mAU) | Width (min) | Symmetry factor | Area (%) |
|--------|------------|--------------|--------------|-------------|-----------------|----------|
| 1      | 18.195     | 6058.5       | 205.4        | 0.4562      | 0.784           | 96.794   |
| 2      | 20.092     | 200.7        | 6.3          | 0.4925      | 1.044           | 3.206    |

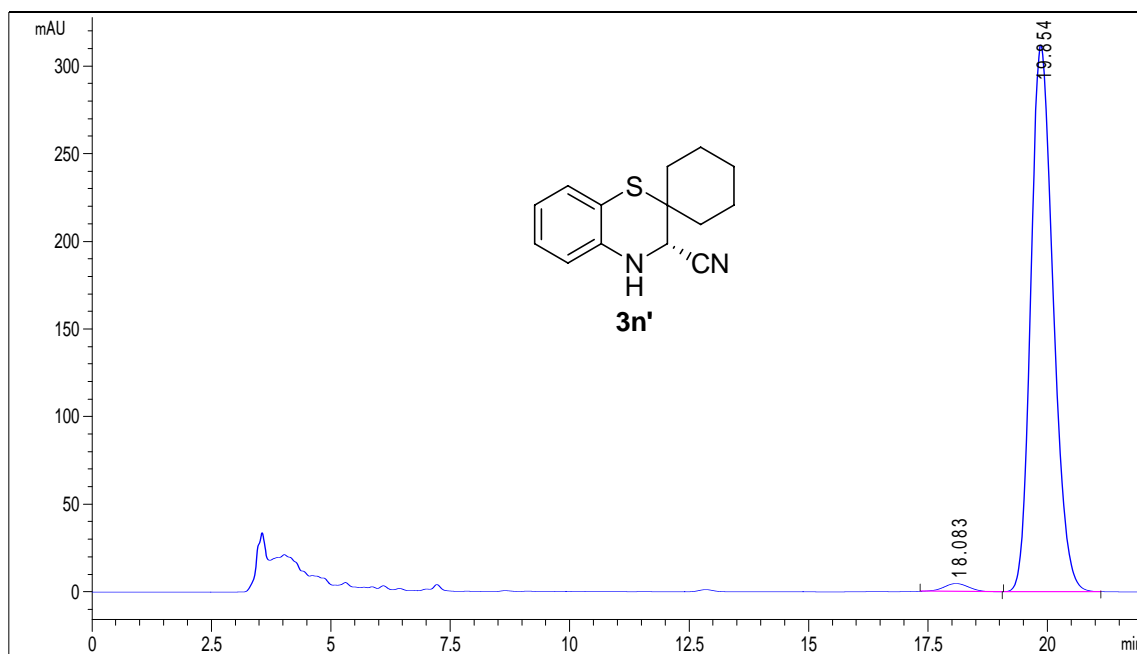

| Number | Time (min) | Area (mAU·s) | Height (mAU) | Width (min) | Symmetry factor | Area (%) |
|--------|------------|--------------|--------------|-------------|-----------------|----------|
| 1      | 18.083     | 169.6        | 4.6          | 0.5766      | 0.98            | 1.641    |
| 2      | 19.854     | 10166.5      | 312.1        | 0.5053      | 0.757           | 98.359   |

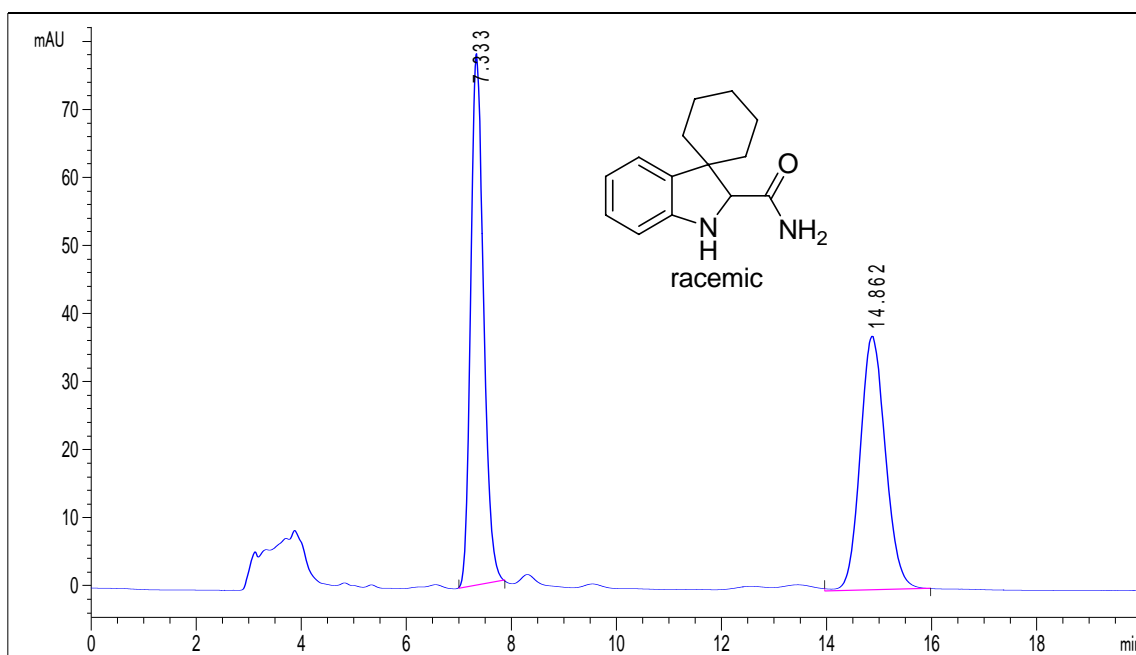

| Number | Time (min) | Area (mAU·s) | Height (mAU) | Width (min) | Symmetry factor | Area (%) |
|--------|------------|--------------|--------------|-------------|-----------------|----------|
| 1      | 7.333      | 1332.9       | 78.1         | 0.2843      | 0.786           | 51.761   |
| 2      | 14.862     | 1242.2       | 37.3         | 0.5552      | 0.878           | 48.239   |

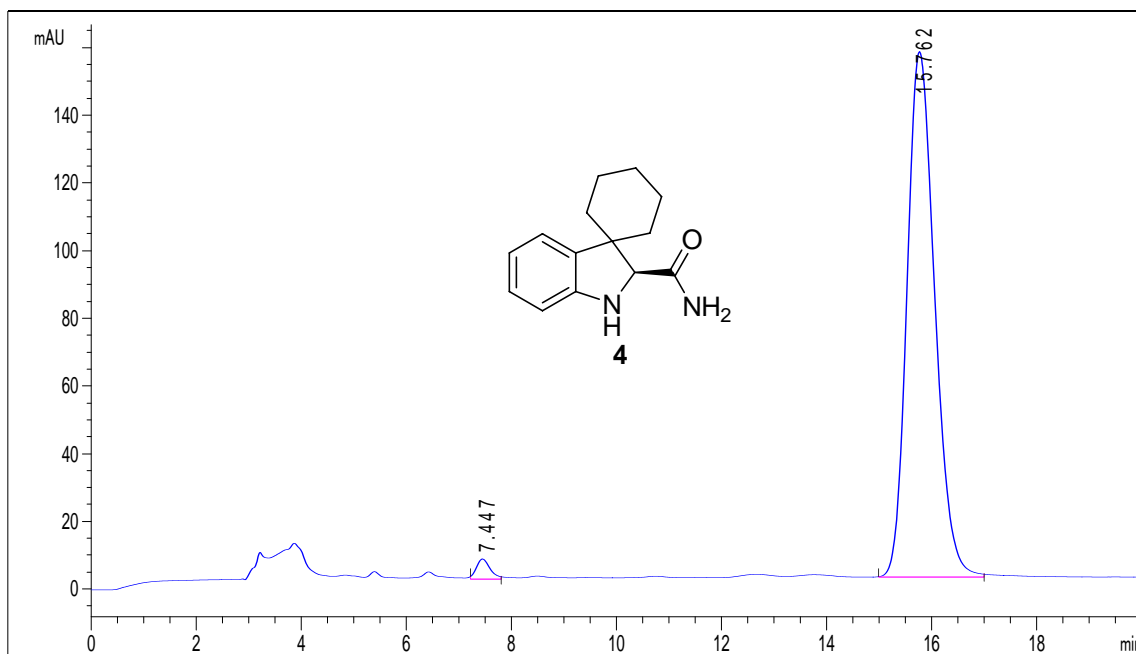

| Number | Time (min) | Area (mAU·s) | Height (mAU) | Width (min) | Symmetry factor | Area (%) |
|--------|------------|--------------|--------------|-------------|-----------------|----------|
| 1      | 7.447      | 115.2        | 6.1          | 0.3124      | 0.766           | 1.991    |
| 2      | 15.762     | 5671.9       | 155.3        | 0.6088      | 0.783           | 98.009   |

The crystal data of compound **3b** have been deposited in CCDC with number 837035.

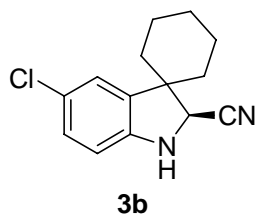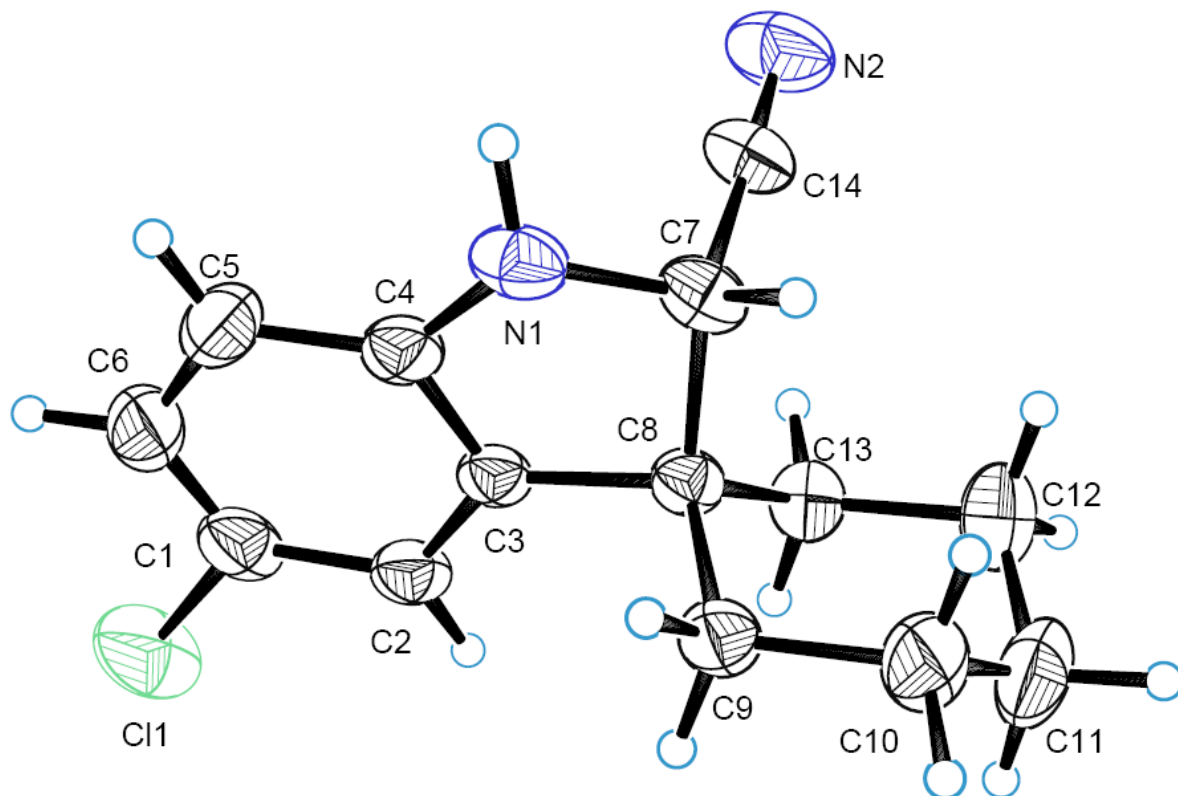

**Table 1 Crystal data and structure refinement for 110726**

|                                    |                                                   |
|------------------------------------|---------------------------------------------------|
| Identification code                | 110726                                            |
| Empirical formula                  | C <sub>14</sub> H <sub>15</sub> ClN <sub>2</sub>  |
| Formula weight                     | 246.73                                            |
| Temperature                        | 291(2)                                            |
| Crystal system                     | Monoclinic                                        |
| Space group                        | P2 <sub>1</sub>                                   |
| a/Å, b/Å, c/Å                      | 7.2479(3), 7.0711(4), 13.0826(6)                  |
| α /°, β /°, γ /°                   | 90.00, 98.024(5), 90.00                           |
| Volume/Å <sup>3</sup>              | 663.93(6)                                         |
| Z                                  | 2                                                 |
| ρ <sub>calc</sub> /mm <sup>3</sup> | 1.234                                             |
| m/mm <sup>2</sup>                  | 0.267                                             |
| F(000)                             | 260                                               |
| Crystal size                       | 0.42 × 0.36 × 0.31                                |
| Theta range for data collection    | 3.15 to 26.37°                                    |
| Index ranges                       | -9 ≤ h ≤ 9, -8 ≤ k ≤ 8, -16 ≤ l ≤ 13              |
| Reflections collected              | 6023                                              |
| Independent reflections            | 2686[R(int) = 0.0243]                             |
| Data/restraints/parameters         | 2686/2/158                                        |
| Goodness-of-fit on F <sup>2</sup>  | 1.024                                             |
| Final R indexes [I > 2 σ (I)]      | R <sub>1</sub> = 0.0460, wR <sub>2</sub> = 0.0895 |
| Final R indexes [all data]         | R <sub>1</sub> = 0.0640, wR <sub>2</sub> = 0.0981 |
| Largest diff. peak/hole            | 0.231/-0.272                                      |

**Table 2 Atomic Coordinates (Å×10<sup>4</sup>) and Equivalent Isotropic Displacement Parameters (Å<sup>2</sup>×10<sup>3</sup>) for 110726. U<sub>eq</sub> is defined as 1/3 of the trace of the orthogonalised U<sub>ij</sub> tensor.**

| Atom | x            | y           | z           | U(eq)     |
|------|--------------|-------------|-------------|-----------|
| Cl1  | 12948.5 (11) | 2115.1 (19) | 5499.4 (6)  | 107.8 (4) |
| N1   | 8674 (3)     | -1218 (3)   | 1808.7 (17) | 56.1 (6)  |
| C3   | 9339 (3)     | 1177 (3)    | 2972.5 (17) | 41.8 (5)  |
| C8   | 7666 (3)     | 1857 (3)    | 2226.3 (16) | 41.4 (5)  |
| C7   | 7822 (4)     | 472 (4)     | 1310.1 (18) | 48.8 (6)  |
| C9   | 5868 (3)     | 1420 (4)    | 2686.2 (18) | 54.1 (7)  |
| C4   | 9850 (3)     | -620 (4)    | 2690.3 (19) | 48.8 (6)  |
| N2   | 9890 (4)     | 1769 (4)    | -16.1 (19)  | 79 (7)    |
| C2   | 10257 (3)    | 2027 (4)    | 3845.3 (17) | 52.2 (6)  |
| C5   | 11274 (4)    | -1601 (4)   | 3273 (3)    | 67.7 (8)  |
| C10  | 4113 (3)     | 2106 (5)    | 2008 (2)    | 73 (9)    |
| C14  | 8982 (4)     | 1244 (4)    | 564.5 (19)  | 56.6 (7)  |
| C13  | 7728 (4)     | 3949 (4)    | 1936 (2)    | 53 (6)    |
| C1   | 11712 (4)    | 1045 (5)    | 4412 (2)    | 65.6 (8)  |
| C12  | 5967 (4)     | 4573 (5)    | 1236 (3)    | 73.8 (9)  |
| C6   | 12215 (4)    | -724 (5)    | 4143 (2)    | 74 (9)    |
| C11  | 4245 (4)     | 4182 (6)    | 1741 (3)    | 88.9 (11) |

**Table 3 Anisotropic Displacement Parameters ( $\text{\AA}^2 \times 10^3$ ) for 110726. The Anisotropic displacement factor exponent takes the form:  $-2 \pi^2 [h^2 a^* 2 U_{11} + \dots + 2 h k a^* b^* U_{12}]$**

| Atom | $U_{11}$  | $U_{22}$  | $U_{33}$ | $U_{23}$ | $U_{13}$ | $U_{12}$  |
|------|-----------|-----------|----------|----------|----------|-----------|
| C11  | 63.1(4)   | 193.1(11) | 61.2(4)  | -14(6)   | -12.1(4) | -10.7(6)  |
| N1   | 78.8(16)  | 43.5(13)  | 50(13)   | -6.6(11) | 22.6(12) | -6.9(11)  |
| C3   | 38.2(11)  | 51.1(14)  | 38.4(11) | 0.8(11)  | 13.5(10) | -1.9(10)  |
| C8   | 37.1(11)  | 48.8(14)  | 38.9(11) | -3(11)   | 7.1(9)   | -4.5(11)  |
| C7   | 52.4(15)  | 53.8(15)  | 41.1(13) | -2.1(11) | 10.4(11) | -15.9(12) |
| C9   | 42.5(12)  | 72.1(18)  | 49.2(13) | 6.3(13)  | 11.9(11) | -0.2(12)  |
| C4   | 50.5(14)  | 52.6(16)  | 47.4(15) | 5.7(12)  | 21.8(12) | 0.6(12)   |
| N2   | 110.6(19) | 73.6(19)  | 60.5(14) | 3.4(13)  | 38.9(14) | -8.6(15)  |
| C2   | 42.2(12)  | 70.5(17)  | 45.2(12) | -7.7(13) | 10.6(10) | -2.3(13)  |
| C5   | 68(19)    | 62.5(19)  | 79(2)    | 20.8(16) | 32.1(17) | 22.3(15)  |
| C10  | 38.3(13)  | 108(3)    | 72(17)   | 14.3(19) | 6.9(12)  | -0.9(16)  |
| C14  | 73.2(18)  | 58.6(16)  | 40(12)   | -2.8(13) | 15.2(13) | -10.5(14) |
| C13  | 53(15)    | 47.3(15)  | 57.3(16) | 0(13)    | 3(12)    | -3.3(12)  |
| C1   | 40.2(14)  | 112(3)    | 45.3(14) | 2.5(17)  | 8.6(12)  | -2.3(16)  |
| C12  | 70.8(19)  | 61.4(18)  | 84(2)    | 17.1(16) | -6.2(17) | 4.3(15)   |
| C6   | 48.9(16)  | 110(3)    | 65(2)    | 26(2)    | 15.7(15) | 19.7(18)  |
| C11  | 54.3(19)  | 110(3)    | 99(3)    | 21(2)    | -1(17)   | 27(2)     |

**Table 4 Bond Lengths for 110726.**

| Atom | Atom | Length/ $\text{\AA}$ | Atom | Atom | Length/ $\text{\AA}$ |
|------|------|----------------------|------|------|----------------------|
| C11  | C1   | 1.745(3)             | C9   | C10  | 1.525(3)             |
| N1   | C4   | 1.400(3)             | C4   | C5   | 1.382(4)             |
| N1   | C7   | 1.457(3)             | N2   | C14  | 1.135(3)             |
| C3   | C2   | 1.377(3)             | C2   | C1   | 1.388(4)             |
| C3   | C4   | 1.388(3)             | C5   | C6   | 1.389(4)             |
| C3   | C8   | 1.524(3)             | C10  | C11  | 1.515(5)             |
| C8   | C13  | 1.529(4)             | C13  | C12  | 1.529(4)             |
| C8   | C9   | 1.541(3)             | C1   | C6   | 1.363(4)             |
| C8   | C7   | 1.564(3)             | C12  | C11  | 1.516(4)             |
| C7   | C14  | 1.478(4)             |      |      |                      |

**Table 5 Bond Angles for 110726.**

| Atom | Atom | Atom | Angle/ $^\circ$ | Atom | Atom | Atom | Angle/ $^\circ$ |
|------|------|------|-----------------|------|------|------|-----------------|
| C4   | N1   | C7   | 107.0(2)        | C5   | C4   | C3   | 121.3(2)        |
| C2   | C3   | C4   | 120.3(2)        | C5   | C4   | N1   | 128.7(3)        |
| C2   | C3   | C8   | 130.0(2)        | C3   | C4   | N1   | 110.0(2)        |
| C4   | C3   | C8   | 109.65(19)      | C3   | C2   | C1   | 117.9(3)        |
| C3   | C8   | C13  | 114.55(18)      | C4   | C5   | C6   | 118.2(3)        |
| C3   | C8   | C9   | 109.08(18)      | C11  | C10  | C9   | 111.6(2)        |
| C13  | C8   | C9   | 110.3(2)        | N2   | C14  | C7   | 177.4(3)        |
| C3   | C8   | C7   | 99.04(18)       | C12  | C13  | C8   | 112.1(2)        |
| C13  | C8   | C7   | 114.07(19)      | C6   | C1   | C2   | 122.2(3)        |
| C9   | C8   | C7   | 109.21(19)      | C6   | C1   | C11  | 118.9(2)        |
| N1   | C7   | C14  | 110.7(2)        | C2   | C1   | C11  | 118.9(3)        |
| N1   | C7   | C8   | 104.01(18)      | C11  | C12  | C13  | 110.8(2)        |
| C14  | C7   | C8   | 112.52(19)      | C1   | C6   | C5   | 120.2(3)        |
| C10  | C9   | C8   | 113.0(2)        | C10  | C11  | C12  | 111.1(3)        |

**Table 6 Hydrogen Bonds for 110726.**

| D  | H  | A  | d(D-H)/Å   | d(H-A)/Å   | d(D-A)/Å  | D-H-A/° |
|----|----|----|------------|------------|-----------|---------|
| N1 | H1 | N2 | 0.871 (17) | 2.200 (19) | 3.048 (3) | 164 (3) |

**Table 7 Torsion Angles for 110726.**

| A   | B  | C   | D   | Angle/°    |
|-----|----|-----|-----|------------|
| C2  | C3 | C8  | C13 | 42.8 (3)   |
| C4  | C3 | C8  | C13 | -140.6 (2) |
| C2  | C3 | C8  | C9  | -81.4 (3)  |
| C4  | C3 | C8  | C9  | 95.3 (2)   |
| C2  | C3 | C8  | C7  | 164.6 (2)  |
| C4  | C3 | C8  | C7  | -18.8 (2)  |
| C4  | N1 | C7  | C14 | 89.5 (2)   |
| C4  | N1 | C7  | C8  | -31.6 (3)  |
| C3  | C8 | C7  | N1  | 29.6 (2)   |
| C13 | C8 | C7  | N1  | 151.8 (2)  |
| C9  | C8 | C7  | N1  | -84.3 (2)  |
| C3  | C8 | C7  | C14 | -90.3 (2)  |
| C13 | C8 | C7  | C14 | 31.9 (3)   |
| C9  | C8 | C7  | C14 | 155.8 (2)  |
| C3  | C8 | C9  | C10 | 178.2 (2)  |
| C13 | C8 | C9  | C10 | 51.6 (3)   |
| C7  | C8 | C9  | C10 | -74.6 (3)  |
| C2  | C3 | C4  | C5  | 0.3 (3)    |
| C8  | C3 | C4  | C5  | -176.7 (2) |
| C2  | C3 | C4  | N1  | 177.4 (2)  |
| C8  | C3 | C4  | N1  | 0.4 (3)    |
| C7  | N1 | C4  | C5  | -162.9 (3) |
| C7  | N1 | C4  | C3  | 20.2 (3)   |
| C4  | C3 | C2  | C1  | 1.1 (3)    |
| C8  | C3 | C2  | C1  | 177.4 (2)  |
| C3  | C4 | C5  | C6  | -1.3 (4)   |
| N1  | C4 | C5  | C6  | -177.9 (3) |
| C8  | C9 | C10 | C11 | -53.2 (3)  |
| N1  | C7 | C14 | N2  | 35 (6)     |

**Table 8 Hydrogen Atom Coordinates ( $\text{\AA} \times 10^4$ ) and Isotropic Displacement Parameters ( $\text{\AA}^2 \times 10^3$ ) for 110726.**

| Atom | <i>x</i> | <i>y</i>  | <i>z</i>  | U(eq)  |
|------|----------|-----------|-----------|--------|
| H7   | 6576     | 171       | 955       | 59     |
| H9A  | 5778     | 65        | 2784      | 65     |
| H9B  | 5941     | 2014      | 3359      | 65     |
| H2   | 9913     | 3222      | 4049      | 63     |
| H5   | 11594    | -2814     | 3088      | 81     |
| H10A | 3925     | 1368      | 1377      | 88     |
| H10B | 3045     | 1910      | 2367      | 88     |
| H13A | 7873     | 4706      | 2561      | 64     |
| H13B | 8803     | 4174      | 1587      | 64     |
| H12B | 6041     | 5915      | 1093      | 89     |
| H12A | 5876     | 3900      | 585       | 89     |
| H6   | 13191    | -1346     | 4544      | 89     |
| H11B | 4291     | 4934      | 2364      | 107    |
| H11A | 3144     | 4550      | 1275      | 107    |
| H1   | 9110 (4) | -1990 (3) | 1378 (18) | 66 (9) |



The crystal data of compound **3m** have been deposited in CCDC with number 832628.

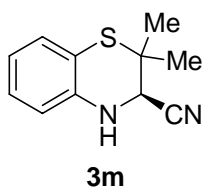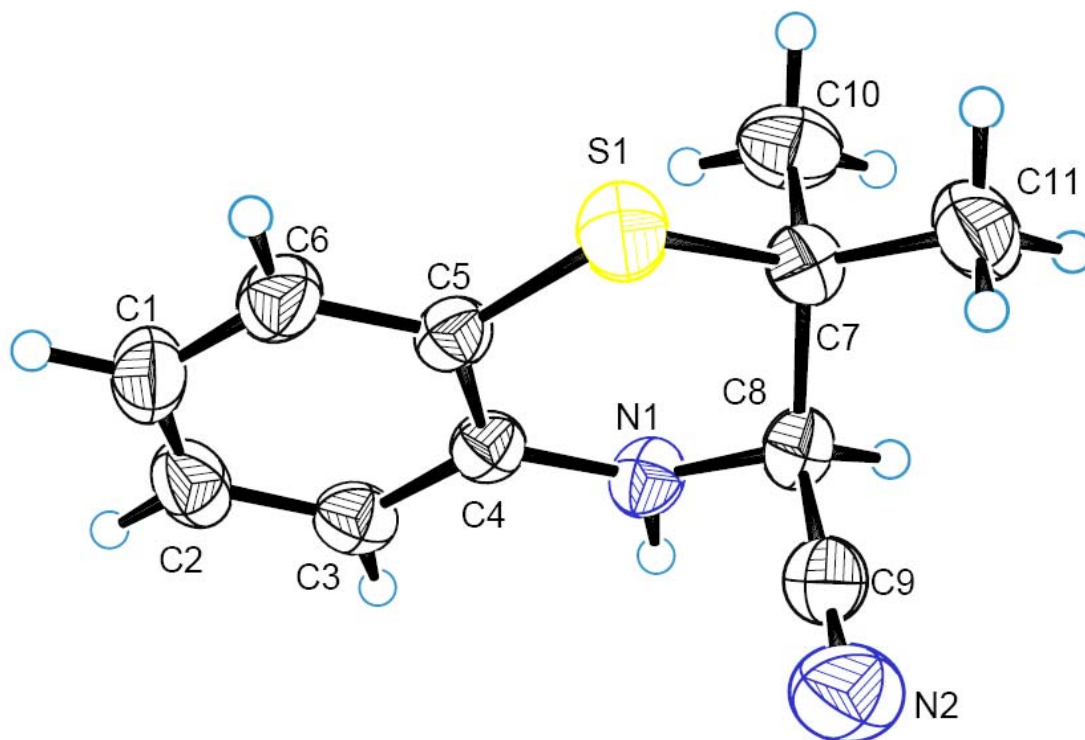

**Table 1 Crystal data and structure refinement for syd110701**

|                                       |                                                   |
|---------------------------------------|---------------------------------------------------|
| Identification code                   | syd110701                                         |
| Empirical formula                     | C <sub>11</sub> H <sub>12</sub> SN <sub>2</sub>   |
| Formula weight                        | 204.29                                            |
| Temperature                           | 291(2)                                            |
| Crystal system                        | Orthorhombic                                      |
| Space group                           | P2 <sub>1</sub> 2 <sub>1</sub> 2 <sub>1</sub>     |
| a/Å, b/Å, c/Å                         | 5.9323(3), 10.0252(8), 18.0127(16)                |
| α /°, β /°, γ /°                      | 90.00, 90.00, 90.00                               |
| Volume/Å <sup>3</sup>                 | 1071.26(14)                                       |
| Z                                     | 4                                                 |
| ρ <sub>calc</sub> /mg/mm <sup>3</sup> | 1.267                                             |
| m/mm <sup>2</sup>                     | 0.263                                             |
| F(000)                                | 432                                               |
| Crystal size                          | 0.42 × 0.36 × 0.32                                |
| Theta range for data collection       | 3.62 to 26.37°                                    |
| Index ranges                          | -7 ≤ h ≤ 7, -12 ≤ k ≤ 12, -22 ≤ l ≤ 22            |
| Reflections collected                 | 9400                                              |
| Independent reflections               | 2199[R(int) = 0.0294]                             |
| Data/restraints/parameters            | 2199/1/133                                        |
| Goodness-of-fit on F <sup>2</sup>     | 1.045                                             |
| Final R indexes [I > 2 σ (I)]         | R <sub>1</sub> = 0.0317, wR <sub>2</sub> = 0.0754 |
| Final R indexes [all data]            | R <sub>1</sub> = 0.0366, wR <sub>2</sub> = 0.0783 |
| Largest diff. peak/hole               | 0.156/-0.154                                      |

**Table 2 Atomic Coordinates (Å×10<sup>4</sup>) and Equivalent Isotropic Displacement Parameters (Å<sup>2</sup>×10<sup>3</sup>) for syd110701. U<sub>eq</sub> is defined as 1/3 of the trace of the orthogonalised U<sub>ij</sub> tensor.**

| Atom | x          | y            | z            | U(eq)      |
|------|------------|--------------|--------------|------------|
| S1   | 5799.9 (7) | 10069.2 (5)  | 8442.3 (3)   | 53.65 (15) |
| N2   | 7588 (4)   | 11426.4 (18) | 10337.5 (11) | 72.3 (5)   |
| C6   | 5458 (3)   | 7397 (19)    | 8621.1 (11)  | 50.6 (5)   |
| N1   | 10454 (3)  | 9376.2 (15)  | 9149.4 (9)   | 43.8 (4)   |
| C4   | 8943 (3)   | 8331.5 (16)  | 9066.8 (9)   | 37.4 (4)   |
| C7   | 8385 (3)   | 11058.9 (17) | 8418.2 (11)  | 44.4 (4)   |
| C1   | 6101 (4)   | 6142 (2)     | 8848.3 (11)  | 59.1 (5)   |
| C3   | 9565 (3)   | 7052.1 (17)  | 9299.2 (10)  | 45.6 (4)   |
| C5   | 6840 (3)   | 8498.7 (16)  | 8723.1 (9)   | 39.4 (4)   |
| C2   | 8169 (4)   | 5969.8 (19)  | 9184 (11)    | 55.8 (5)   |
| C10  | 9794 (4)   | 10736 (2)    | 7734.5 (12)  | 63.9 (6)   |
| C8   | 9750 (3)   | 10754.9 (16) | 9123.6 (10)  | 42.7 (4)   |
| C9   | 8497 (3)   | 11144.4 (18) | 9802.6 (11)  | 50.4 (4)   |
| C11  | 7622 (4)   | 12520.1 (19) | 8413.7 (13)  | 62.6 (6)   |

**Table 3 Anisotropic Displacement Parameters (Å<sup>2</sup>×10<sup>3</sup>) for syd110701. The Anisotropic displacement factor exponent takes the form: -2 π<sup>2</sup>[h<sup>2</sup>a<sup>2</sup>U<sub>11</sub>+...+2hka×b×U<sub>12</sub>]**

| Atom | U <sub>11</sub> | U <sub>22</sub> | U <sub>33</sub> | U <sub>23</sub> | U <sub>13</sub> | U <sub>12</sub> |
|------|-----------------|-----------------|-----------------|-----------------|-----------------|-----------------|
| S1   | 38.4(2)         | 51.6(2)         | 71(3)           | 5.4(2)          | -11.1(2)        | 2.3(2)          |
| N2   | 90.8(14)        | 70.4(12)        | 55.7(11)        | -4.7(10)        | 10.8(10)        | 18.6(11)        |
| C6   | 47.1(10)        | 57(11)          | 47.7(11)        | -4.3(8)         | 1(8)            | -13.1(9)        |
| N1   | 34.9(7)         | 44(8)           | 52.5(10)        | -2.9(7)         | -7.6(7)         | 0.7(6)          |
| C4   | 37.8(8)         | 40(8)           | 34.5(9)         | -4.2(7)         | 4.8(7)          | 2(7)            |
| C7   | 44.7(9)         | 42.1(8)         | 46.4(10)        | 2.7(8)          | 2.3(8)          | -0.8(7)         |
| C1   | 71.6(14)        | 48.3(10)        | 57.4(12)        | -5.2(9)         | 12.4(11)        | -19.2(10)       |
| C3   | 49.8(10)        | 48.2(10)        | 38.7(10)        | -1.3(7)         | 5.1(8)          | 8.9(8)          |
| C5   | 39.5(9)         | 42.5(9)         | 36.1(9)         | -4.7(7)         | 1.5(7)          | -2.2(7)         |
| C2   | 78.1(13)        | 38.2(9)         | 51.2(12)        | 1.8(9)          | 15.4(11)        | 4.1(9)          |
| C10  | 66.1(13)        | 78.7(14)        | 47(12)          | 2.7(10)         | 10(10)          | 7.4(11)         |
| C8   | 41.4(9)         | 38.8(9)         | 47.9(11)        | -3.7(7)         | 0.5(8)          | -4.8(7)         |
| C9   | 58(11)          | 43.2(9)         | 50.1(11)        | -1.5(8)         | -1.3(9)         | 2.9(8)          |
| C11  | 78.4(15)        | 45.3(10)        | 64.1(14)        | 9.7(10)         | 2.7(12)         | 5.6(10)         |

**Table 4 Bond Lengths for syd110701.**

| Atom | Atom | Length/Å   | Atom | Atom | Length/Å |
|------|------|------------|------|------|----------|
| S1   | C5   | 1.7650(17) | C4   | C5   | 1.403(2) |
| S1   | C7   | 1.8272(18) | C7   | C10  | 1.523(3) |
| N2   | C9   | 1.140(3)   | C7   | C11  | 1.533(2) |
| C6   | C1   | 1.377(3)   | C7   | C8   | 1.537(2) |
| C6   | C5   | 1.388(2)   | C1   | C2   | 1.379(3) |
| N1   | C4   | 1.386(2)   | C3   | C2   | 1.381(3) |
| N1   | C8   | 1.445(2)   | C8   | C9   | 1.484(3) |
| C4   | C3   | 1.399(2)   |      |      |          |

**Table 5 Bond Angles for syd110701.**

| Atom | Atom | Atom | Angle/°    | Atom | Atom | Atom | Angle/°    |
|------|------|------|------------|------|------|------|------------|
| C5   | S1   | C7   | 101.41(8)  | C8   | C7   | S1   | 108.35(12) |
| C1   | C6   | C5   | 121.61(19) | C6   | C1   | C2   | 119.42(19) |
| C4   | N1   | C8   | 122.19(13) | C2   | C3   | C4   | 121.16(18) |
| N1   | C4   | C3   | 119.35(15) | C6   | C5   | C4   | 119.26(16) |
| N1   | C4   | C5   | 122.13(15) | C6   | C5   | S1   | 117.74(14) |
| C3   | C4   | C5   | 118.44(16) | C4   | C5   | S1   | 122.95(13) |
| C10  | C7   | C11  | 111.17(17) | C1   | C2   | C3   | 120.09(18) |
| C10  | C7   | C8   | 109.70(15) | N1   | C8   | C9   | 111.72(16) |
| C11  | C7   | C8   | 110.45(16) | N1   | C8   | C7   | 111.63(14) |
| C10  | C7   | S1   | 111.35(14) | C9   | C8   | C7   | 111.43(15) |
| C11  | C7   | S1   | 105.73(13) | N2   | C9   | C8   | 177.8(2)   |

**Table 6 Torsion Angles for syd110701.**

| <b>A</b> | <b>B</b> | <b>C</b> | <b>D</b> | <b>Angle/°</b> |
|----------|----------|----------|----------|----------------|
| C8       | N1       | C4       | C3       | -162.15 (16)   |
| C8       | N1       | C4       | C5       | 21.1 (3)       |
| C5       | S1       | C7       | C10      | 75.93 (15)     |
| C5       | S1       | C7       | C11      | -163.22 (14)   |
| C5       | S1       | C7       | C8       | -44.80 (13)    |
| C5       | C6       | C1       | C2       | -0.1 (3)       |
| N1       | C4       | C3       | C2       | -175.84 (16)   |
| C5       | C4       | C3       | C2       | 1.1 (3)        |
| C1       | C6       | C5       | C4       | -0.1 (3)       |
| C1       | C6       | C5       | S1       | -177.65 (15)   |
| N1       | C4       | C5       | C6       | 176.46 (16)    |
| C3       | C4       | C5       | C6       | -0.4 (2)       |
| N1       | C4       | C5       | S1       | -6.1 (2)       |
| C3       | C4       | C5       | S1       | 177.07 (13)    |
| C7       | S1       | C5       | C6       | -163.75 (14)   |
| C7       | S1       | C5       | C4       | 18.79 (16)     |
| C6       | C1       | C2       | C3       | 0.8 (3)        |
| C4       | C3       | C2       | C1       | -1.3 (3)       |
| C4       | N1       | C8       | C9       | 72.7 (2)       |
| C4       | N1       | C8       | C7       | -52.8 (2)      |
| C10      | C7       | C8       | N1       | -58.26 (19)    |
| C11      | C7       | C8       | N1       | 178.86 (16)    |
| S1       | C7       | C8       | N1       | 63.49 (15)     |
| C10      | C7       | C8       | C9       | 176.06 (17)    |
| C11      | C7       | C8       | C9       | 53.18 (19)     |
| S1       | C7       | C8       | C9       | -62.19 (16)    |
| N1       | C8       | C9       | N2       | 49 (6)         |
| C7       | C8       | C9       | N2       | 175 (100)      |

**Table 7 Hydrogen Atom Coordinates ( $\text{\AA} \times 10^4$ ) and Isotropic Displacement Parameters ( $\text{\AA}^2 \times 10^3$ ) for syd110701.**

| Atom | <i>x</i>  | <i>y</i>  | <i>z</i>  | U(eq)  |
|------|-----------|-----------|-----------|--------|
| H6   | 4063      | 7509      | 8394      | 61     |
| H1   | 5149      | 5417      | 8776      | 71     |
| H3   | 10944     | 6928      | 9535      | 55     |
| H2   | 8625      | 5124      | 9333      | 67     |
| H10B | 10172     | 9805      | 7736      | 96     |
| H10C | 11151     | 11257     | 7742      | 96     |
| H10A | 8946      | 10941     | 7295      | 96     |
| H8   | 11118     | 11301     | 9105      | 51     |
| H11B | 8920      | 13092     | 8425      | 94     |
| H11C | 6701      | 12690     | 8841      | 94     |
| H11A | 6768      | 12694     | 7971      | 94     |
| H4   | 11560 (3) | 9241 (19) | 9437 (10) | 54 (6) |
